# Supplementary material
Source: Royal Society of Chemistry journal article supplement (doi:10.1039/d5fo03084f)
Supplement: d5fo03084f1.xlsx [file d5fo03084f1.xlsx]

## Sheet: 工作表1
Count	Compound	CAS#	Formula	MW	RI	Rt [sec]	Dt [a.u.]
1	methyl-5-hepten-2-one	C110930	C8H14O	126.2	988.9	541.693	1.17805
2	1-octen-3-one-M	C4312996	C8H14O	126.2	975.2	505.23	1.2774
3	alpha-Pinene	C80568	C10H16	136.2	952.9	451.056	1.28459
4	2-heptanone-D	C110430	C7H14O	114.2	893.5	334.374	1.63173
5	2-heptanone-M	C110430	C7H14O	114.2	893.5	334.374	1.25945
6	Acetic acid butyl ester-D	C123864	C6H12O2	116.2	816.5	228.11	1.61976
7	Acetic acid butyl ester-M	C123864	C6H12O2	116.2	818.3	230.193	1.23551
8	Hexanal-D	C66251	C6H12O	100.2	799	209.357	1.5623
9	Hexanal-M	C66251	C6H12O	100.2	803	213.524	1.26304
10	2,3-Butanediol	C513859	C4H10O2	90.1	805	215.608	1.36598
11	acetic acid ethyl ester-D	C141786	C4H8O2	88.1	601.3	83.298	1.33606
12	2,3-butanedione-D	C431038	C4H6O2	86.1	591.3	79.716	1.18049
13	Furfural-D	C98011	C5H4O2	96.1	835.1	249.969	1.33268
14	Furfural-M	C98011	C5H4O2	96.1	836.7	251.972	1.0833
15	dipropyl disulfide	C629196	C6H14S2	150.3	1101.6	965.032	1.4823
16	Hexanoic acid	C142621	C6H12O2	116.2	1033.9	681.611	1.61275
17	1.8-Cineole-M	C470826	C10H18O	154.3	1033.9	681.66	1.25208
18	5-Methylfurfural-D	C620020	C6H6O2	110.1	952.4	450.074	1.46755
19	5-Methylfurfural-M	C620020	C6H6O2	110.1	952.4	450.01	1.14559
20	butanal-D	C123728	C4H8O	72.1	598.5	82.291	1.28966
21	Area 19	unidentified	*	0	1034.4	683.27	1.53832
22	Area 21	unidentified	*	0	1002.3	579.94	1.40808
23	Area 22	unidentified	*	0	1034.1	682.402	1.45561
24	Area 23	unidentified	*	0	827	240.27	1.58097
25	Area 26	unidentified	*	0	798	208.372	1.34423
26	Area 29	unidentified	*	0	666.6	111.605	1.32009
27	Area 32	unidentified	*	0	632.2	95.482	1.15635
28	Area 34	unidentified	*	0	863.1	287.308	0.95469
29	Area 35	unidentified	*	0	816.9	228.599	1.04108
30	Area 36	unidentified	*	0	645	101.137	1.40148
31	Area 39	unidentified	*	0	786.3	196.805	1.09113
32	Area 42	unidentified	*	0	1001.6	577.922	1.49922
33	Area 44	unidentified	*	0	1010.7	605.384	1.12719
34	Area 45	unidentified	*	0	975.6	506.172	1.10759
35	Area 46	unidentified	*	0	742.2	159.056	1.07513
36	Area 47	unidentified	*	0	755.8	169.817	0.97073
37	Area 49	unidentified	*	0	883.6	318.21	1.08614
38	Area 51	unidentified	*	0	891.1	330.453	1.54615
39	Area 52	unidentified	*	0	911.1	365.224	1.39175
40	Area 54	unidentified	*	0	914.5	371.649	1.08135
41	Area 55	unidentified	*	0	653.5	105.146	1.24638
42	Area 56	unidentified	*	0	912.1	367.056	1.29881
43	Area 60	unidentified	*	0	893	333.459	1.38341
44	Area 48	unidentified	*	0	1016.7	624.324	1.74518
