# Supplementary material
Source: Royal Society of Chemistry journal article supplement (doi:10.1039/d5fo03084f)
Supplement: d5fo03084f2.xlsx [file d5fo03084f2.xlsx]

## Sheet: AnnotationTable_CC_n10
																					CC-2	CC-1	CC-3	CC-4	CC-5	CM24-1	CM24-5	CM24-4	CM24-3	CM24-2
Compound NO.	Compound NO ion mode	Name	Formula	PubChem NO.	CAS NO.	HMDB	KEGG NO.	Calc. MW	m/z	RT [min]	mzCloud Best Match	MS2	Reference Ion	Confidence level	Annot. Source: LWHK Search	Annot. Source: mzCloud Search	Annot. Source: Metabolika Search	Annot. Source: ChemSpider Search	Annot. Source: Predicted Compositions	Annot. DeltaMass [ppm]	0HR	0HR	0HR	0HR	0HR	24HR	24HR	24HR	24HR	24HR	Group Area: 0HR	Group Area: 24HR	Group Area: 0HR	Group Area: 24HR	Group CV [%]: 0HR	Group CV [%]: 24HR	Ratio: (24HR) / (0HR)	Log2 Fold Change: (24HR) / (0HR)	P-value: (24HR) / (0HR)	Adj. P-value: (24HR) / (0HR)
1	P001	Betaine	C5 H12 N O2	247	6915-17-9	HMDB0000043		117.079	118.086	0.867	94.6	DDA for preferred ion	[M+H]+1	1	●	●	●	●	●	0.13	36.6046	40.4424	40.4571	38.3525	38.7885	39.71	39.8381	39.5935	41.2639	39.6041	1	1	38.929	40.0019	4.13816	1.78082	1.02756	0.0392236	0.2103	0.351671
2	P002	Serine	C3 H7 N O3	5951	56-45-1	HMDB0000589	C00065	105.043	106.05	0.791	93.8	DDA for preferred ion	[M+H]+1	1	●	●	●	●	●	0.79	4.02183	4.07148	4.10717	4.07943	4.00961	3.78104	3.71564	3.84169	3.63565	3.74086	1	1	4.05791	3.74298	1.00923	2.04622	0.922391	-0.116549	3.96411e-05	0.000193613
3	P003	Ectoine	C6 H10 N2 O2	126041	96702-03-3	HMDB0240650	C06231	142.074	143.081	0.978		DDA for preferred ion	[M+H]+1	1	●	●	●	●	●	-0.65	27.8927	29.5993	27.1689	26.4058	26.1217	29.1198	27.7583	27.735	27.7833	28.0431	1	1	27.4377	28.0879	5.07264	2.10073	1.0237	0.0337911	0.364317	0.518326
4	P004	Adenosine monophosphate	C10 H14 N5 O7 P	6083				347.063	348.07	1.515	99.2	DDA for preferred ion	[M+H]+1	1	●	●	●	●	●	-1.57	1.44849	1.60605	1.51511	1.4259	1.4322	1.51748	1.53205	1.48387	1.49131	1.53506	1	1	1.48555	1.51195	5.12343	1.54525	1.01778	0.0254191	0.479515	0.638026
5	P005	Adenosine	C10 H13 N5 O4	60961	58-61-7	HMDB0004401	C00212	267.096	268.104	4.451	99.9	DDA for preferred ion	[M+H]+1	1	●	●	●	●	●	-1.39	27.2712	30.4077	30.4793	31.3643	30.1753	21.7385	22.7928	22.5807	21.1994	22.3757	1	1	29.9396	22.1374	5.20562	2.96361	0.739404	-0.435566	6.72045e-06	3.63722e-05
6	P006	L-Methionine	C5 H11 N O2 S	6137	63-68-3	HMDB0000696	C00073	149.051	150.058	1.562	98.6	DDA for preferred ion	[M+H]+1	1	●	●	●	●	●	-0.48	4.04454	4.23173	4.39175	4.27756	4.41319	2.63519	2.74073	2.90862	2.85313	2.92343	1	1	4.27175	2.81222	3.46564	4.34731	0.658329	-0.603119	1.45646e-07	1.14375e-06
7	P007	Leucine	C6 H13 N O2	6106	61-90-5	HMDB0013773	C00123	131.095	132.102	2.868	99.7	DDA for preferred ion	[M+H]+1	1	●	●	●	●	●	-0.42	33.2961	35.7641	36.9892	36.2433	36.3632	18.2399	18.0808	18.544	18.8787	31.8084	1	1	35.7312	21.1104	4.00099	28.3661	0.59081	-0.759233	0.000719326	0.00267991
8	P008	Guanosine	C10 H13 N5 O5	135398635	118-00-3	HMDB00133	C00387	283.091	284.099	4.633		DDA for preferred ion	[M+H]+1	1	●	●	●	●	●	-0.97	3.14104	3.45977	3.56936	3.63086	3.53713	2.34721	2.41515	2.46961	2.22815	2.36317	1	1	3.46763	2.36466	5.55732	3.81229	0.681923	-0.552319	2.78821e-06	1.59526e-05
9	P009	gamma-Glutamylalanine	C8 H14 N2 O5	440103	5875-41-2	HMDB0006248	C03740	218.09	219.097	1.016		DDA for preferred ion	[M+H]+1	1	●	●	●	●	●	-1.68	39.3694	41.5255	39.2457	37.9551	40.0102	37.6972	38.6125	37.4313	42.0193	39.8499	1	1	39.6212	39.122	3.28057	4.7944	0.987403	-0.0182897	0.637915	0.756993
10	P010	5-Methyluridine	C10 H14 N2 O6	445408	1463-10-1	HMDB0000884		258.085	259.092	4.909		DDA for preferred ion	[M+H]+1	1	●	●	●	●	●	-0.59	0.790199	0.890518	0.88289	0.841884	0.822711	0.814841	0.807936	0.833167	0.833179	0.835607	1	1	0.845641	0.824946	4.95224	1.53389	0.975528	-0.0357448	0.321063	0.471875
11	P011	Niacinamide	C6 H6 N2 O	936	98-92-0	HMDB0001406	C00153	122.048	123.055	1.765	98.4	DDA for preferred ion	[M+H]+1	1	●	●	●	●	●	0.07	3.06236	3.35526	3.69968	3.58389	3.67617	0.197278	0.224835	0.266238	0.24031	0.242735	1	0	3.47548	0.234279	7.71278	10.8563	0.0674092	-3.89091	3.90748e-09	4.60279e-08
12	P012	L-Pyroglutamic acid	C5 H7 N O3	7405	98-79-3	HMDB0000805	C01879	129.042	130.05	1.952	98	DDA for preferred ion	[M+H]+1	1	●	●	●	●	●	-0.86	305.91	345.235	335.791	334.663	332.561	334.992	326.872	339.535	335.281	345.27	1	1	330.832	336.39	4.45984	2.00807	1.0168	0.0240374	0.465721	0.626963
13	P013	Glutamate	C5 H9 N O4	33032	56-86-0	HMDB00148	C00025	147.053	148.06	0.847	99.5	DDA for preferred ion	[M+H]+1	1	●	●	●	●	●	-2.02	58.4797	63.6407	66.0875	64.6599	63.11	64.0883	62.2892	61.562	65.471	65.0272	1	1	63.1956	63.6876	4.54179	2.67497	1.00778	0.0111877	0.750175	0.832257
14	P014	Nicotinic acid	C6 H5 N O2	938	59-67-6	HMDB01488	C00253	123.032	124.039	1.574	99.5	DDA for preferred ion	[M+H]+1	1	●	●	●	●	●	0.17	6.28465	6.73771	6.72193	6.66378	6.66483	8.67485	8.30023	8.53579	8.61001	8.94699	1	1	6.61458	8.61357	2.83323	2.71755	1.30221	0.380962	4.04423e-07	2.86675e-06
15	P015	Creatinine	C4 H7 N3 O	588	60-27-5	HMDB00562	C00791	113.059	114.066	0.892	78.1	DDA for preferred ion	[M+H]+1	1	●	●	●	●	●	0.68	0.865451	0.985275	0.990206	0.999488	0.945097	0.936323	0.876395	0.999264	0.999398	0.952852	1	1	0.957103	0.952846	5.77734	5.36149	0.995552	-0.00643128	0.902499	0.927987
16	P016	gamma-Glutamylvaline	C10 H18 N2 O5	7015683	2746-34-1	HMDB0011172		246.121	247.129	5.051		DDA for preferred ion	[M+H]+1	1	●	●	●	●	●	-1.41	2.12946	2.28344	2.20995	2.48315	2.54634	2.30466	2.37629	2.28246	2.25755	2.34984	1	1	2.33047	2.31416	7.64754	2.09864	0.993002	-0.010131	0.848432	0.894202
17	P017	Nε,Nε,Nε-Trimethyllysine	C9 H20 N2 O2	159660	19253-88-4	HMDB0001325	C03793	188.152	189.16	0.758	96.5	DDA for preferred ion	[M+H]+1	1	●	●	●	●	●	-1.11	0.950474	1.05612	1.11814	1.03285	1.06163	1.11609	1.08946	1.15998	1.14264	1.12879	1	1	1.04384	1.12739	5.83244	2.3732	1.08004	0.111085	0.0228675	0.056086
18	P018	Threonine	C4 H9 N O3	6288	72-19-5	HMDB00167	C00188	119.058	120.066	0.835	96.4	DDA for preferred ion	[M+H]+1	1	●	●	●	●	●	-0.07	3.39957	3.64313	3.84763	3.63316	3.66682	2.72653	2.67073	2.71379	2.65605	2.72496	1	1	3.63806	2.69841	4.38227	1.214	0.741717	-0.43106	1.22648e-06	7.44249e-06
19	P019	Asparagine	C4 H8 N2 O3	6267	70-47-3	HMDB00168	C00152	132.053	133.061	0.8	89.7	DDA for preferred ion	[M+H]+1	1	●	●	●	●	●	-1.02	14.1502	15.1284	14.9298	14.3807	13.8437	12.3557	12.1071	12.1919	11.8118	12.1714	1	1	14.4866	12.1275	3.69501	1.63995	0.837159	-0.256427	1.52961e-05	7.95596e-05
20	P020	Isoleucine	C6 H13 N O2	6306	73-32-5	HMDB0000172	C00407	131.095	132.102	2.612	99.4	DDA for preferred ion	[M+H]+1	1	●	●	●	●	●	-0.2	17.2997	19.1575	19.1929	19.6645	19.8153	12.2324	12.1208	13.1764	12.2622	12.9686	1	1	19.026	12.5521	5.29255	3.85274	0.659732	-0.600048	1.19078e-06	7.32618e-06
21	P021	gamma-Glutamylphenylalanine	C14 H18 N2 O5	111299	7432-24-8	HMDB0000594		294.121	295.128	6.875		DDA for preferred ion	[M+H]+1	1	●	●	●	●	●	-2.23	393.165	443.195	441.718	458.394	462.188	415.803	411.923	423.295	448.889	442.113	1	1	439.732	428.405	6.2661	3.80715	0.974241	-0.0376497	0.451739	0.612255
22	P022	gamma-Glutamyltyrosine	C14 H18 N2 O6	94340	7432-23-7	HMDB0011741		310.116	311.123	5.49		DDA for preferred ion	[M+H]+1	1	●	●	●	●	●	-0.85	1.35769	1.52311	1.44171	1.48058	1.49149	1.5077	1.55043	1.5548	1.51795	1.55988	1	1	1.45892	1.53815	4.36125	1.53697	1.05431	0.0763012	0.0311175	0.0733092
23	P023	Tryptophan	C11 H12 N2 O2	6305	73-22-3	HMDB00929	C00078	204.09	205.097	6.28	99.7	DDA for preferred ion	[M+H]+1	1	●	●	●	●	●	-0.92	13.6446	15.1334	15.3249	14.8337	14.4686	14.8729	13.9266	14.5191	14.7365	14.4916	1	1	14.681	14.5093	4.5205	2.494	0.988304	-0.0169726	0.625211	0.749263
24	P024	Phenylalanine	C9 H11 N O2	6140	63-91-2	HMDB0000612	C00079	165.079	166.086	5.152	99.2	DDA for preferred ion	[M+H]+1	1	●	●	●	●	●	-1.66	634.945	710.846	709.62	715.641	728.906	675.729	647.771	684.21	682.558	696.343	1	1	699.992	677.322	5.30818	2.67433	0.967615	-0.0474951	0.254965	0.404107
25	P025	Pantothenic acid	C9 H16 N O5	6613	79-83-4	HMDB00210	C00864	219.111	220.118	5.596		DDA for preferred ion	[M+H]+1	1	●	●	●	●	●	0.12	5.46776	6.26909	5.75192	6.11089	5.74924	7.98256	8.00855	8.21923	8.13914	8.27406	1	1	5.86978	8.12471	5.4385	1.57077	1.38416	0.46901	4.58709e-07	3.16746e-06
26	P026	Valine	C5 H11 N O2	6287	72-18-4	HMDB0034366	C00183	117.079	118.086	1.093	99.5	DDA for preferred ion	[M+H]+1	1	●	●	●	●	●	0.06	14.1022	18.8043	18.9991	18.1875	18.6047	16.7414	14.851	16.634	12.3883	16.4752	1	1	17.7396	15.418	11.5868	12.0683	0.869131	-0.202355	0.0980523	0.192513
27	P027	Histidine	C6 H9 N3 O2	6274	71-00-1	HMDB0003412	C00135	155.069	156.077	0.773	99.6	DDA for preferred ion	[M+H]+1	1	●	●	●	●	●	-0.95	25.6574	27.6826	26.6556	27.4574	26.7494	27.8431	28.0784	28.5586	27.5555	27.5134	1	1	26.8405	27.9098	2.96411	1.53753	1.03984	0.056361	0.0294758	0.070478
28	P028	Tyrosine	C9 H11 N O3	6057	60-18-4	HMDB0000158	C00082	181.074	182.081	2.715	98.3	DDA for preferred ion	[M+H]+1	1	●	●	●	●	●	-0.65	12.0221	13.3612	13.0825	13.3905	12.9433	11.5128	11.1177	11.6265	11.3325	11.698	1	1	12.9599	11.4575	4.29834	2.04958	0.884072	-0.177764	0.000536447	0.00204616
29	P029	Trigonelline	C7 H7 N O2	5570	535-83-1	HMDB00875	C01004	137.047	138.055	0.927	99.9	DDA for preferred ion	[M+H]+1	1	●	●	●	●	●	-1.96	198.002	217.929	217.182	221	214.852	215.663	202.884	215.432	216.651	219.213	1	1	213.793	213.969	4.25503	2.97964	1.00082	0.0011856	0.972643	0.975078
30	P030	DL-pipecolinic acid	C6 H11 N O2	849	535-75-1	HMDB00070	C00408	129.079	130.086	1.076	99.4	DDA for preferred ion	[M+H]+1	1	●	●	●	●	●	-1.47	1101.75	1170.03	1153.3	974.059	1146.75	1156.24	1087.98	1153.49	1177.04	1027.78	1	1	1109.18	1120.51	7.18056	5.50423	1.01021	0.0146583	0.807813	0.866791
31	P031	Lysine	C6 H14 N2 O2	5962	56-87-1	HMDB00182	C00047	146.105	147.113	0.722	97.5	DDA for preferred ion	[M+H]+1	1	●	●	●	●	●	-1.34	2.99789	3.15685	3.23477	3.26977	3.15141	2.23729	2.21458	2.30022	2.20993	2.30862	1	1	3.16214	2.25413	3.31605	2.09196	0.712848	-0.488333	1.08085e-07	8.83431e-07
32	P032	Arginine	C6 H14 N4 O2	6322	74-79-3	HMDB00517	C00062	174.111	175.119	0.781	94.4	DDA for preferred ion	[M+H]+1	1	●	●	●	●	●	-1.4	23.0928	23.5725	23.2387	23.5413	21.9352	24.6095	24.9049	25.4978	23.2747	24.0569	1	1	23.0761	24.4688	2.8998	3.45834	1.06035	0.0845428	0.0203047	0.0506669
33	P033	Proline	C5 H9 N O2	145742	147-85-3	HMDB0000162	C00148	115.063	116.071	0.941	99.6	DDA for preferred ion	[M+H]+1	1	●	●	●	●	●	0.06	12.0317	13.329	13.7295	14.5895	14.0791	15.6008	14.727	15.6936	15.9529	15.9489	1	1	13.5517	15.5846	7.14171	3.23383	1.15001	0.201646	0.00314006	0.0097488
34	P034	trans-3-Indoleacrylic acid	C11 H9 N O2	5375048	1204-06-4,29953-71-7	HMDB0000734		187.063	188.07	6.28	93.4	DDA for preferred ion	[M+H]+1	2	●	●	●	●	●	-0.92	5.60329	6.13477	6.18087	5.93578	5.86891	6.00733	5.70803	5.84863	5.96777	5.87996	1	1	5.94472	5.88234	3.89349	1.98342	0.989507	-0.0152186	0.605126	0.735518
35	P035	2-Amino-4-methylpyrimidine	C5 H7 N3	7939	108-52-1			109.064	110.071	0.774	87.7	DDA for preferred ion	[M+H]+1	2	●	●	●	●	●	1.2	2.637	2.85605	2.67458	2.82171	2.67301	2.8775	2.88254	2.92149	2.85967	2.83026	1	1	2.73247	2.87429	3.62457	1.16155	1.0519	0.0730026	0.0162038	0.0414673
36	P036	NP-015948	C21 H30 O10					442.183	443.19	8.683	98.1	DDA for preferred ion	[M+H]+1	2	●	●	●	●	●	-1.81	2.90084	5.37328	3.7731	10.1522	7.49197	1.76025	2.74603	3.37403	3.59194	5.4912	1	1	5.93828	3.39269	49.3875	40.4327	0.571325	-0.807616	0.116791	0.218064
37	P037	NP-013210	C12 H14 O3					206.094	207.101	6.663	62.5	DDA for preferred ion	[M+H]+1	2	●	●	●	●	●	-0.4	0.473127	0.516158	0.511865	0.719435	0.480315	1.31962	1.25702	1.29546	1.30634	1.30293	0	1	0.54018	1.29627	18.8769	1.82233	2.39971	1.26286	2.16809e-07	1.62303e-06
38	P038	Corymboside	C26 H28 O14	13644660				564.147	565.154	7.947	90.6	DDA for preferred ion	[M+H]+1	2	●	●	●	●	●	-1.35	1.29691	1.42485	1.38347	1.43796	1.43205	1.43481	1.3091	1.39754	1.44393	1.43366	1	1	1.39505	1.40381	4.22	3.97758	1.00628	0.00903112	0.815305	0.871757
39	P039	Maltotriose	C18 H32 O16	439586				504.168	505.175	0.988	84.8	DDA for preferred ion	[M+H]+1	2	●	●	●	●	●	-2.35	1.85901	2.40897	2.04092	1.80067	1.99784	1.62119	2.01334	1.81509	1.73149	1.80544	1	1	2.02148	1.79731	11.7648	7.98568	0.889106	-0.169573	0.108796	0.206123
40	P040	1-Aminocyclohexanecarboxylic acid	C7 H13 N O2	1366	2756-85-6			143.095	144.102	1.422	97.4	DDA for preferred ion	[M+H]+1	2	●	●	●	●	●	-0.84	5.54474	6.16084	6.11272	5.61971	5.99706	6.13194	5.4435	6.0078	6.03233	6.76752	1	1	5.88701	6.07662	4.85406	7.75357	1.03221	0.0457321	0.463771	0.625389
41	P041	Thymine	C5 H6 N2 O2	1135	65-71-4	HMDB00262	C00178	126.043	127.05	4.907	91.7	DDA for preferred ion	[M+H]+1	2	●	●	●	●	●	0.65	1.02055	1.12388	1.06786	1.02988	1.03181	1.05216	1.02685	1.03704	1.02049	1.05058	0	1	1.0548	1.03743	4.04029	1.35392	0.983532	-0.0239559	0.411914	0.568868
42	P042	Guanine	C5 H5 N5 O	135398634	73-40-5	HMDB00132	C00242	151.049	152.057	4.63	98.3	DDA for preferred ion	[M+H]+1	2	●	●	●	●	●	-0.13	1.11378	1.21456	1.21025	1.24176	1.1972	0.857762	0.887942	0.887563	0.850848	0.937518	1	1	1.19551	0.884327	4.05518	3.8677	0.739707	-0.434973	2.55295e-06	1.48182e-05
43	P043	Cytidine	C9 H13 N3 O5	6175	65-46-3	HMDB00089	C00475	243.085	244.092	1.46	99.2	DDA for preferred ion	[M+H]+1	2	●	●	●	●	●	-1.8	0.4113	0.439456	0.492866	0.429882	0.479796	0.434715	0.467694	0.457183	0.447401	0.486298	0	1	0.45066	0.458658	7.63594	4.28882	1.01775	0.0253799	0.663827	0.770616
44	P044	NP-021018	C12 H18 O4					226.12	227.127	8.22	72.2	DDA for preferred ion	[M+H]+1	2	●	●	●	●	●	-1.6	0.309242	0.317998	0.322201	0.376663	0.2098	14.6028	14.2465	14.641	14.4946	14.8797	0	1	0.307181	14.5729	19.7065	1.58081	47.4408	5.56806	1.07692e-14	4.32805e-12
45	P045	Adenine	C5 H5 N5	190	73-24-5	HMDB00034	C00147	135.054	136.062	4.451	61.2	DDA for preferred ion	[M+H]+1	2	●	●	●	●	●	-1.35	1.65269	1.80814	1.82014	1.98596	1.95972	1.33748	1.36842	1.46412	1.38042	1.43357	1	0	1.84533	1.3968	7.27011	3.66403	0.75694	-0.40175	0.00011436	0.000506091
46	P046	Imidazolelactic acid	C6 H8 N2 O3	459122	876-19-7	HMDB02320	C05132	156.053	157.061	0.956	96.5	DDA for preferred ion	[M+H]+1	2	●	●	●	●	●	-1.3	0.0695698	0.0821775	0.0646497	0.0831767	0.0749154	0.371979	0.351758	0.335297	0.32521	0.355984	0	1	0.0748978	0.348046	10.6592	5.24621	4.64694	2.21628	1.39523e-09	1.92686e-08
47	P047	trans-Aconitic acid	C6 H6 O6	444212	4023-65-8	HMDB00958	C02341	174.016	175.023	1.779	72.7	DDA for preferred ion	[M+H]+1	2	●	●	●	●	●	-1.4	20.9548	22.4867	22.1929	21.8554	21.6015	0.0101919	0.0134278	0.0211446	0.0748886	0.00930856	1	0	21.8183	0.0257923	2.69328	107.935	0.00118214	-9.72438	5.03153e-13	3.35908e-11
48	P048	Zeatin-7-N-glucoside	C16 H23 N5 O6					381.163	382.17	5.74	65.1	DDA for preferred ion	[M+H]+1	2	●	●	●	●	●	-4.74	0.923408	0.98237	0.939892	0.939019	0.94067	0.270226	0.250961	0.264897	0.265893	0.249357	1	0	0.945072	0.260267	2.33227	3.63445	0.275394	-1.86043	4.03033e-12	1.40363e-10
49	P049	Inosine	C10 H12 N4 O5	135398641	58-63-9	HMDB00195	C00294	268.081	269.088	4.62	88	DDA for preferred ion	[M+H]+1	2	●	●	●	●	●	-0.96	0.78506	0.884629	0.85921	0.753605	0.720795	2.75343	2.18609	2.43172	2.63225	2.54158	1	1	0.80066	2.50901	8.67896	8.6001	3.13368	1.64786	1.55862e-07	1.21209e-06
50	P050	NP-021018	C12 H18 O4					226.12	227.128	7.487	61.5	DDA for preferred ion	[M+H]+1	2	●	●	●	●	●	-1.03	5.31204	5.87496	5.7246	5.5193	5.32354	0.206095	0.422357	0.428383	0.421761	0.421551	1	1	5.55089	0.380029	4.4579	25.5963	0.0684628	-3.86854	8.62569e-11	2.03211e-09
51	P051	2-Amino-1,3,4-octadecanetriol	C18 H39 N O3	248575	13552-11-9,33511-66-9			317.292	318.3	12.408	87.1	DDA for preferred ion	[M+H]+1	2	●	●	●	●	●	-1.86	3.65922	2.98399	3.32282	3.22332	3.90332	3.53718	3.25482	3.08587	3.29842	3.49702	1	1	3.41853	3.33466	10.6384	5.54899	0.975466	-0.0358372	0.658024	0.767122
52	P052	2-Methoxyresorcinol	C7 H8 O3					140.047	141.054	0.881	76.4	DDA for preferred ion	[M+H]+1	2	●	●	●	●	●	-1.33	1.86323	2.03028	1.92544	1.9788	1.8814	1.97634	1.94519	2.02553	2.07349	1.95972	1	0	1.93583	1.99606	3.57051	2.64638	1.03111	0.0442004	0.160196	0.281396
53	P053	Cytarabine	C9 H13 N3 O5	6253	147-94-4	HMDB0015122	C02961	243.085	244.092	1.031	98	DDA for preferred ion	[M+H]+1	2	●	●	●	●	●	-1.64	0.527919	0.541399	0.612163	0.56965	0.604547	0.594419	0.554197	0.564203	0.599253	0.606533	1	0	0.571135	0.583721	6.52409	3.95205	1.02204	0.0314455	0.538741	0.683885
54	P054	Hypoxanthine	C5 H4 N4 O	135398638	68-94-0	HMDB00157	C00262	136.038	137.046	4.62	92.6	DDA for preferred ion	[M+H]+1	2	●	●	●	●	●	-0.09	1.40701	1.56608	1.51176	1.31047	1.26503	4.78516	3.82279	4.2092	4.51839	4.42933	1	1	1.41207	4.35297	9.07092	8.29683	3.08268	1.62419	1.35202e-07	1.08297e-06
55	P055	3-Hydroxypyridine	C5 H5 N O	7971				95.0373	96.0446	1.028	92.2	DDA for preferred ion	[M+H]+1	2	●	●	●	●	●	2.14	1.1412	1.29818	1.19999	1.14157	1.1024	1.16891	1.21374	1.10762	1.16213	1.15621	1	1	1.17667	1.16172	6.48851	3.25389	0.987301	-0.0184386	0.705149	0.804593
56	P056	DL-β-Leucine	C6 H13 N O2					131.095	132.102	0.932	80.9	DDA for preferred ion	[M+H]+1	2	●	●	●	●	●	-0.36	0.535004	0.621698	0.623352	0.649733	0.62527	0.61035	0.544999	0.623861	0.616775	0.621617	1	1	0.611011	0.603521	7.20224	5.48813	0.98774	-0.0177962	0.768805	0.845896
57	P057	Triethyl phosphate	C6 H15 O4 P	6535	78-40-0	HMDB12228		182.071	183.078	10.203	94.9	DDA for preferred ion	[M+H]+1	2	●	●	●	●	●	-0.77	0.963967	0.825229	1.27868	1.05538	1.47819	0.907885	1.08119	0.891179	1.56358	1.2609	1	1	1.12029	1.14095	23.1433	24.5284	1.01844	0.0263597	0.906616	0.929833
58	P058	Adenine	C5 H5 N5	190	73-24-5	HMDB00034	C00147	135.054	136.062	1.46	92.2	DDA for preferred ion	[M+H]+1	2	●	●	●	●	●	-1.72	1.08475	1.07352	1.20551	1.05681	1.1464	0.154322	0.157488	0.0975907	0.171075	0.165445	1	0	1.1134	0.149184	5.53422	19.8305	0.13399	-2.8998	1.11029e-09	1.77869e-08
59	P059	D-Lactose monohydrate	C12 H22 O11					342.115	343.123	0.988	81.6	DDA for preferred ion	[M+H]+1	2	●	●	●	●	●	-2.16	1.15089	1.37452	1.23901	1.17862	1.2365	1.17993	1.31817	1.12347	1.12034	1.20456	1	1	1.23591	1.18929	6.97588	6.78118	0.962284	-0.055466	0.403038	0.558161
60	P060	NP-013538	C12 H16 O8					288.084	289.091	0.986	61.8	DDA for preferred ion	[M+H]+1	2	●	●	●	●	●	-2.17	1.22176	1.25228	1.25798	1.25951	1.249	0.880805	1.01347	1.17601	1.14313	1.19811	1	1	1.2481	1.0823	1.22803	12.3298	0.867158	-0.205634	0.0246717	0.0597041
61	P061	Jasmonic acid	C12 H18 O3	5281166	6894-38-8	HMDB32797	C08491	210.125	211.133	7.745	95.9	DDA for preferred ion	[M+H]+1	2	●	●	●	●	●	-0.78	2.36818	2.66407	2.67544	2.64787	2.56802	0.352755	0.357144	0.378358	0.380384	0.354862	1	1	2.58472	0.364701	4.95783	3.70193	0.141099	-2.82522	2.2641e-10	4.90146e-09
62	P062	Jasmonic acid	C12 H18 O3	5281166	6894-38-8	HMDB32797	C08491	210.125	211.133	8.511	94.9	DDA for preferred ion	[M+H]+1	2	●	●	●	●	●	-0.72	0.21217	0.250331	0.143139	0.162813	0.141889	3.70883	3.53232	3.60016	3.62286	3.69329	1	1	0.182068	3.63149	26.1491	1.98056	19.9458	4.31801	2.72893e-13	3.14089e-11
63	P063	2-Isopropyl-5-thieno[3,2-b]thiophen-2-yl-1,3,4-oxadiazole	C11 H10 N2 O S2					250.023	251.03	0.763	89.9	DDA for preferred ion	[M+H]+1	2	●	●	●	●	●	-1.25	0.54708	0.597271	0.591727	0.553218	0.535356	0.652802	0.637965	0.725008	0.632577	0.675037	1	1	0.56493	0.664678	4.92341	5.64538	1.17657	0.234582	0.00139917	0.00472883
64	P064	DL-Stachydrine	C7 H13 N O2	555				143.095	144.102	1.953	66.5	DDA for preferred ion	[M+H]+1	2	●	●	●	●	●	-0.36	1.36631	1.55438	1.16454	1.04979	1.08985	1.21838	1.26744	1.0046	1.18714	1.65898	1	1	1.24498	1.26731	16.9958	18.9724	1.01794	0.0256519	0.879954	0.914193
65	P065	4-Amino-3-hydroxybenzoic acid	C7 H7 N O3	137566	2374-03-0			153.043	154.05	5.432	89.6	DDA for preferred ion	[M+H]+1	2	●	●	●	●	●	0.2	0.680421	0.73083	0.706987	0.703034	0.678907	0.720412	0.706399	0.73006	0.756507	0.735409	1	1	0.700036	0.729758	3.06108	2.54573	1.04246	0.0599887	0.0471645	0.104361
66	P066	Guanine	C5 H5 N5 O	135398634	73-40-5	HMDB00132	C00242	151.049	152.057	2.071	98.4	DDA for preferred ion	[M+H]+1	2	●	●	●	●	●	-0.68	1.39706	1.53434	1.47145	1.43553	1.4427	0.386078	1.41157	1.5745	0.433106	1.55903	1	1	1.45622	1.07286	3.50928	56.7673	0.736743	-0.440767	0.198336	0.335163
67	P067	DL-Alanine	C3 H7 N O2	602	302-72-7			89.0479	90.0552	0.8	96.3	DDA for preferred ion	[M+H]+1	2	●	●	●	●	●	2.63	26.0675	28.022	27.9707	26.7416	26.5158	31.7529	30.0869	30.4803	29.5054	30.3681	1	1	27.0635	30.4387	3.27234	2.71339	1.12471	0.169557	0.000250476	0.00101843
68	P068	2'-Deoxyadenosine	C10 H13 N5 O3	13730	958-09-8	HMDB0005778	C00559	251.102	252.109	4.626	99.5	DDA for preferred ion	[M+H]+1	2	●	●	●	●	●	-0.92	0.566271	0.639241	0.65655	0.696534	0.693746	0.0444217	0.0544356	0.0395635	0.0449887	0.0486426	1	0	0.650468	0.0464104	8.15208	11.9115	0.0713492	-3.80896	6.31066e-09	6.73979e-08
69	P069	DL-Stachydrine	C7 H13 N O2	555				143.094	144.102	0.985	99.8	DDA for preferred ion	[M+H]+1	2	●	●	●	●	●	-2.31	327.09	349.914	335.31	334.205	334.059	344.081	321.39	334.577	330.863	340.806	1	1	336.116	334.343	2.49088	2.66066	0.994728	-0.00762668	0.753966	0.835306
70	P070	5-Hydroxymethyl-2-furaldehyde	C6 H6 O3	237332	67-47-0	HMDB34355	C11101	126.032	127.039	0.986	69.5	DDA for preferred ion	[M+H]+1	2	●	●	●	●	●	-0.82	9.65462	11.0062	10.0018	10.3096	10.4971	10.1649	9.76004	10.2354	9.71536	10.2328	1	1	10.2939	10.0217	4.96034	2.60702	0.973562	-0.0386556	0.319676	0.471816
71	P071	Urocanic acid	C6 H6 N2 O2	736715	104-98-3,3465-72-3	HMDB0000301	C00785	138.043	139.05	1.688	67.3	DDA for preferred ion	[M+H]+1	2	●	●	●	●	●	-0.63	0.46983	0.893272	0.865056	0.767681	0.745651	0.478164	0.861657	0.571274	0.731225	0.913322	1	1	0.748298	0.711128	22.4192	26.0982	0.950328	-0.0735032	0.748259	0.831283
72	P072	Choline	C5 H13 N O	305	62-49-7	HMDB00097	C00114	103.1	104.107	0.813	98.1	DDA for preferred ion	[M+H]+1	2	●	●	●	●	●	0.69	243.589	260.768	261.637	255.341	244.584	265.928	260.455	257.366	261.404	269.259	1	1	253.184	262.882	3.41861	1.7887	1.03831	0.0542315	0.0588447	0.123713
73	P073	7-Oxobenz[de]anthracene	C17 H10 O	6697	82-05-3			230.072	231.079	5.079	73.3	DDA for preferred ion	[M+H]+1	2	●	●	●	●	●	-4.75	0.458113	0.495293	0.577177	0.497962	0.517351	0.56853	0.525377	0.555192	0.570854	0.572817	0	1	0.509179	0.558554	8.57013	3.54271	1.09697	0.133523	0.0501388	0.109134
74	P074	NP-015948	C21 H30 O10					442.183	443.191	7.662	82.6	DDA for preferred ion	[M+H]+1	2	●	●	●	●	●	-1.33	0.671649	0.673658	0.564656	0.565676	0.519517	0.517234	0.425543	0.429044	0.414301	0.417501	1	1	0.599031	0.440725	11.6435	9.79756	0.735729	-0.442754	0.00256274	0.00808171
75	P075	5-Hydroxymethyl-2-furaldehyde	C6 H6 O3	237332	67-47-0	HMDB34355	C11101	126.032	127.039	0.866	73.5	DDA for preferred ion	[M+H]+1	2	●	●	●	●	●	-0.66	8.6844	8.77228	7.42049	7.29876	7.01701	12.9298	8.31126	8.23611	11.055	10.7876	1	1	7.83859	10.2639	10.5362	19.4442	1.30941	0.38892	0.0363196	0.0833522
76	P076	Syringic acid	C9 H10 O5	10742	530-57-4	HMDB02085	C10833	198.053	199.06	6.022	92.1	DDA for preferred ion	[M+H]+1	2	●	●	●	●	●	-0.48	0.484821	0.542103	0.51814	0.505229	0.493082	0.0195715	0.0213531	0.0160101	0.0229045	0.0238143	1	1	0.508675	0.0207307	4.42985	14.9165	0.0407543	-4.6169	3.94451e-11	1.0895e-09
77	P077	DL-3-Aminoisobutyric acid	C4 H9 N O2	64956				103.063	104.071	0.951	81.1	DDA for preferred ion	[M+H]+1	2	●	●	●	●	●	0.94	38.5093	42.3124	43.5009	44.1343	42.0118	44.4978	41.273	44.2434	43.3415	43.2548	1	1	42.0938	43.3221	5.18395	2.92767	1.02918	0.0414962	0.308191	0.459704
78	P078	7-(tert-butyl)-4-imino-1,2,3,4,5,6-hexahydropyrido[3,4-d]pyridazine-1,5-dione	C11 H14 N4 O2					234.111	235.119	2.633	90.5	DDA for preferred ion	[M+H]+1	2	●	●	●	●	●	-0.93	1.72249	1.91388	1.89493	1.96866	1.82928	1.88125	1.79251	1.93988	1.85482	1.96695	0	1	1.86585	1.88708	5.05703	3.6699	1.01138	0.0163252	0.695629	0.797137
79	P079	D-(-)-Aspartic acid	C4 H7 N O4	83887	1783-96-6	HMDB06483	C00402	133.037	134.045	0.812	99.6	DDA for preferred ion	[M+H]+1	2	●	●	●	●	●	-1.44	25.6936	27.6771	26.4221	25.2739	24.0593	27.363	27.3152	27.1482	26.1557	26.9737	1	1	25.8252	26.9912	5.2043	1.8208	1.04515	0.0637082	0.105949	0.204002
80	P080	6-Hydroxynicotinate	C6 H5 N O3	72924	5006-66-6	HMDB0002658	C01020	139.027	140.034	1.906		DDA for preferred ion	[M+H]+1	3	●	●	●	●	●	-1.17	1.486	1.76803	1.66071	1.46602	1.50196	1.16988	1.13201	1.17514	1.21241	1.21191	1	1	1.57654	1.18027	8.37446	2.84075	0.748644	-0.417648	0.00018712	0.000793033
81	P081	Iprobenfos	C13 H21 O3 P S	33294	26087-47-8	HMDB0031768	C15230	288.095	289.103	0.881		No MS2	[M+H]+1	3	●	●	●	●	●	1.16	0.368454	0.461161	0.436459	0.419059	0.421664	0.418768	0.431598	0.435236	0.448071	0.427221	1	1	0.421359	0.432179	8.06254	2.49931	1.02568	0.0365769	0.516503	0.663011
82	P082	CYCLOTETRAGLUCOSE	C24 H40 O20	11686063				648.21	649.217	1.176		No MS2	[M+H]+1	3	●	●	●	●	●	-2.01	0.357082	0.396513	0.436775	0.419477	0.40614	0.448066	0.437412	0.347326	0.278554	0.414305	1	1	0.403198	0.385132	7.41195	18.5124	0.955195	-0.0661322	0.615463	0.743944
83	P083	Maleamate	C4 H5 N O3	5280451	557-24-4			115.027	116.034	1.535		DDA for preferred ion	[M+H]+1	3	●	●	●	●	●	0.93	1.09217	1.18098	1.29144	1.21807	1.21666	1.24489	1.27997	1.30361	1.29305	1.40696	1	1	1.19987	1.3057	6.03232	4.65511	1.0882	0.121948	0.0367247	0.0833522
84	P084	g-Guanidinobutyrate	C5 H11 N3 O2	500	463-00-3	HMDB0005991	C01035	145.085	146.092	1.035		No MS2	[M+H]+1	3	●	●	●	●	●	-1.56	0.365951	0.360857	0.335896	0.394111	0.455958	0.403915	0.376702	0.374947	0.465481	0.369637	1	1	0.382555	0.398137	12.011	10.0295	1.04073	0.0575969	0.582807	0.714898
85	P085	Cysteinyl-4-hydroxyproline	C8 H14 N2 O4 S					234.067	235.075	3.237		DDA for preferred ion	[M+H]+1	3	●	●	●	●	●	-0.76	3.10058	3.36916	3.50166	3.24606	3.15207	1.35443	1.85669	1.69298	1.47138	1.40816	1	0	3.27391	1.55673	4.98654	13.5821	0.475495	-1.0725	5.35999e-07	3.57779e-06
86	P086	N6-METHYLLYSINE	C7 H16 N2 O2	164795	1188-07-4	HMDB02038	C02728	160.121	161.128	0.755		No MS2	[M+H]+1	3	●	●	●	●	●	-1.07	0.567496	0.597493	0.627697	0.609716	0.564518	0.651588	0.620445	0.671551	0.59123	0.662005	1	1	0.593384	0.639364	4.5878	5.17133	1.07749	0.107671	0.0431378	0.0962489
87	P087	mk-3903	C27 H19 Cl N2 O3	45256689	1219737-12-8			454.108	455.115	0.889		No MS2	[M+H]+1	3	●	●	●	●	●	-1.09	0.487948	0.525198	0.530625	0.53054	0.510855	0.513483	0.506572	0.539654	0.590517	0.515318	1	1	0.517033	0.533109	3.51075	6.46022	1.03109	0.0441737	0.38283	0.538486
88	P088	EED226	C17 H15 N5 O3 S	123132228	2083627-02-3			369.09	370.097	0.94		DDA for preferred ion	[M+H]+1	3	●	●	●	●	●	1.3	0.470845	0.539535	0.531699	0.509046	0.496827	0.643677	0.476678	0.447671	0.705924	0.601285	1	1	0.50959	0.575047	5.41867	19.1345	1.12845	0.174342	0.233023	0.3817
89	P089	1-Piperideine-2-carboxylate	C6 H9 N O2	5460387				127.063	128.071	0.892		No MS2	[M+H]+1	3	●	●	●	●	●	-0.27	0.692064	0.802049	0.792444	0.750708	0.802793	0.702826	0.729974	0.762558	0.786006	0.732708	1	1	0.768012	0.742814	6.18742	4.32131	0.967192	-0.0481264	0.354624	0.509057
90	P090	Midodrine	C12 H18 N2 O4	4195	42794-76-3,97476-58-9,133163-28-7	HMDB0014356	C07890	254.126	255.133	0.915		No MS2	[M+H]+1	3	●	●	●	●	●	-2.35	0.312967	0.29462	0.290438	0.30971	0.306796	0.333115	0.273729	0.340318	0.351632	0.326001	1	1	0.302906	0.324959	3.2463	9.28233	1.0728	0.101386	0.158723	0.280655
91	P091	(2S,4S)-4-Hydroxy-2,3,4,5-tetrahydrodipicolinate	C7 H9 N O5	70678847				187.048	188.055	2.575		DDA for preferred ion	[M+H]+1	3	●	●	●	●	●	-0.56	2.29883	2.55657	2.44422	2.51983	2.4822	2.41433	2.41904	2.53533	2.46612	2.51387	1	1	2.46033	2.46974	4.04522	2.20872	1.00382	0.00550556	0.857578	0.900374
92	P092	Thymine	C5 H6 N2 O2	1135	65-71-4	HMDB00262	C00178	126.043	127.05	0.942		DDA for preferred ion	[M+H]+1	3	●	●	●	●	●	-0.12	0.329293	0.356302	0.352404	0.445822	0.430516	0.403487	0.37235	0.418106	0.40711	0.405949	0	1	0.382867	0.4014	13.5325	4.28011	1.04841	0.0681983	0.469507	0.629941
93	P093	6-Hydroxy-5a,9-dimethyl-3-methylene-3a,5,5a,6,7,9b-hexahydronaphtho[1,2-b]furan-2,8(3H,4H)-dione	C15 H18 O4					262.12	263.127	9.455		DDA for preferred ion	[M+H]+1	3	●	●	●	●	●	-1.43	0.0220574	0.0281114	0.0265733	0.0261826	0.0331198	0.934044	0.967428	1.02798	0.981028	0.999962	0	1	0.0272089	0.982089	14.6721	3.58204	36.0944	5.1737	6.35025e-12	2.1194e-10
94	P094	prexasertib	C18 H19 N7 O2	46700756	1234015-52-1			365.158	366.166	5.766		DDA for preferred ion	[M+H]+1	3	●	●	●	●	●	-4.31	0.977809	1.09453	1.04798	1.08965	1.12597	0.926749	0.951489	0.971616	1.01134	0.998418	1	1	1.06719	0.971923	5.35532	3.53226	0.910734	-0.134898	0.0127063	0.0335899
95	P095	CZ415	C22 H29 N5 O4 S	71547699	1429639-50-8			459.194	460.201	0.88		No MS2	[M+H]+1	3	●	●	●	●	●	0.4	0.239987	0.300305	0.247703	0.2293	0.263864	0.321872	0.301106	0.307441	0.307026	0.283385	1	1	0.256232	0.304166	10.799	4.57222	1.18707	0.247409	0.00855479	0.023793
96	P096	crenigacestat	C22 H23 F3 N4 O4					464.165	465.172	8.687		DDA for preferred ion	[M+H]+1	3	●	●	●	●	●	-4.54	0.610224	0.680666	0.336543	0.841799	0.855371	0.499761	0.492176	0.570879	0.579007	0.614461	1	0	0.664921	0.551257	31.7817	9.63843	0.829056	-0.270458	0.277041	0.422685
97	P097	5-(2-Carboxyethyl)-4-hydroxy-6-oxo-5,6-dihydro-2-pyridinecarboxylic acid	C9 H9 N O6					227.043	228.05	0.969		No MS2	[M+H]+1	3	●	●	●	●	●	-1.99	0.539039	0.617431	0.602074	0.580607	0.620787	0.520524	0.543552	0.57891	0.596241	0.54048	1	0	0.591988	0.555942	5.67315	5.54305	0.93911	-0.090634	0.114975	0.215174
98	P098	Succinate	C4 H6 O4	160419	56-14-4			118.027	119.034	0.839		No MS2	[M+H]+1	3	●	●	●	●	●	0.3	0.501458	0.546116	0.640385	0.651625	0.588632	0.426605	0.440835	0.480036	0.596247	0.531648	1	1	0.585643	0.495074	10.8023	14.0778	0.845351	-0.242377	0.0636194	0.132361
99	P099	LU3453000	C4 H4 O2					84.0214	85.0287	1.302		DDA for preferred ion	[M+H]+1	3	●	●	●	●	●	3.51	1.28561	1.39376	1.19711	1.39964	1.10951	1.19383	1.1345	1.27135	1.2387	1.26288	1	1	1.27713	1.22025	9.84084	4.63935	0.955467	-0.0657217	0.383193	0.538486
100	P100	3-O-beta-D-galactosyl-sn-glycerol	C9 H18 O8	16048618	16232-91-0	HMDB38664		254.1	255.107	0.917		No MS2	[M+H]+1	3	●	●	●	●	●	-2.18	0.389393	0.379217	0.390368	0.39333	0.395716	0.368383	0.333124	0.408448	0.394394	0.401052	1	1	0.389605	0.38108	1.62203	8.07331	0.978121	-0.0319155	0.560758	0.698504
101	P101	AZD0364	C24 H24 F2 N8 O2					494.201	495.208	6.663		DDA for preferred ion	[M+H]+1	3	●	●	●	●	●	2.99	0.981053	1.10517	1.03828	1.10062	1.07747	1.09134	1.0226	1.07778	1.10722	1.05829	1	1	1.06052	1.07144	4.87665	3.05107	1.0103	0.0147858	0.70014	0.800018
102	P102	Gly-thr	C6 H12 N2 O4	111257	7093-70-1,27174-15-8			176.079	177.087	0.849		DDA for preferred ion	[M+H]+1	3	●	●	●	●	●	-1.33	0.663222	0.746159	0.725684	0.693102	0.676953	0.662537	0.6701	0.665104	0.66453	0.64626	1	1	0.701024	0.661706	4.8983	1.37108	0.943914	-0.0832731	0.0383866	0.0863699
103	P103	3-Amino-2-piperidinone	C5 H10 N2 O					114.079	115.087	0.883		No MS2	[M+H]+1	3	●	●	●	●	●	0.73	0.671428	0.711286	0.769135	0.561627	0.536996	0.559193	0.583674	0.691435	0.530102	0.626185	1	0	0.650095	0.598118	15.1865	10.523	0.920047	-0.12022	0.349946	0.504149
104	P104	N.pi.-Methyl-L-histidine	C7 H11 N3 O2					169.085	170.092	0.785		No MS2	[M+H]+1	3	●	●	●	●	●	-1.07	0.439897	0.446946	0.470212	0.468712	0.445925	0.445665	0.459142	0.467009	0.454892	0.462454	1	1	0.454338	0.457832	3.09813	1.77444	1.00769	0.0110526	0.643575	0.758094
105	P105	Lombricine	C6 H15 N4 O6 P	159847				270.073	271.081	0.986		No MS2	[M+H]+1	3	●	●	●	●	●	1.74	0.443737	0.607367	0.485669	0.531921	0.431573	0.493444	0.447896	0.489592	0.462058	0.489649	1	1	0.500053	0.476528	14.3511	4.27258	0.952954	-0.0695215	0.500701	0.651074
106	P106	L-Proline, 4-hydroxy-5-oxo-4-(tetrahydro-2,3,4-trihydroxy-2-furanyl)-	C9 H13 N O8	71437684	41679-87-2	HMDB0029944		263.064	264.071	0.972		No MS2	[M+H]+1	3	●	●	●	●	●	-2.1	0.511747	0.56727	0.656695	0.591974	0.62735	0.599705	0.526017	0.538571	0.620602	0.547712	1	0	0.591007	0.566522	9.45204	7.27876	0.95857	-0.0610448	0.453107	0.613072
107	P107	N,N-Dihydroxy-L-valine	C5 H11 N O4	25202133				149.069	150.076	0.808		No MS2	[M+H]+1	3	●	●	●	●	●	-1.12	0.528031	0.646989	0.666314	0.655362	0.660263	0.600697	0.651188	0.568645	0.627238	0.600828	0	1	0.631392	0.609719	9.21957	5.10419	0.965675	-0.0503909	0.483802	0.640499
108	P108	Hex-2-ulofuranosyl hexopyranosyl-(1->6)hexopyranoside	C18 H32 O16					504.168	505.175	1.165		No MS2	[M+H]+1	3	●	●	●	●	●	-2.12	0.318679	0.414696	0.422336	0.388056	0.466849	0.39105	0.354231	0.383989	0.531997	0.401865	1	1	0.402123	0.412627	13.5735	16.7295	1.02612	0.0371994	0.796309	0.862489
109	P109	GSK269962	C29 H30 N8 O5	16095342	850664-21-0			570.231	571.239	9.347		DDA for preferred ion	[M+H]+1	3	●	●	●	●	●	-4.31	0.898775	2.08748	2.09109	2.51411	2.62621	1.03618	1.87134	0.968511	2.11413	2.16346	1	1	2.04353	1.63072	33.5089	35.854	0.797993	-0.325552	0.335287	0.4883
110	P110	Furfuranol	C5 H6 O2	7361	98-00-0	HMDB0034245	C20441	98.037	99.0442	0.88		DDA for preferred ion	[M+H]+1	3	●	●	●	●	●	1.74	1.34608	1.50536	1.52786	1.51123	1.48185	1.39739	1.28848	1.43742	1.45966	1.39436	0	1	1.47448	1.39546	4.99469	4.71716	0.946412	-0.0794604	0.111458	0.209081
111	P111	N-feruloylglycine	C12 H13 N O5	5280527				251.079	252.086	8.445		DDA for preferred ion	[M+H]+1	3	●	●	●	●	●	-1.64	3.02224	1.84583	1.80867	1.91651	1.90588	3.47622	3.22359	3.35934	3.48226	3.4899	1	1	2.09983	3.40626	24.6464	3.38681	1.62216	0.697919	0.000567419	0.00214403
112	P112	APM	C7 H13 N O4					175.084	176.092	0.995		DDA for preferred ion	[M+H]+1	3	●	●	●	●	●	-1.13	0.91284	0.854481	0.7875	0.839512	0.780828	0.865129	0.815092	0.943551	0.793435	1.00162	1	1	0.835033	0.883766	6.46287	9.91097	1.05836	0.0818326	0.320434	0.471816
113	P113	Ethiin	C5 H11 N O3 S	487523				165.046	166.053	0.867		No MS2	[M+H]+1	3	●	●	●	●	●	-1.1	0.77882	0.91899	0.908243	0.902621	0.952146	0.733779	0.680124	0.645423	0.681352	0.662395	0	1	0.892164	0.680615	7.4207	4.87169	0.762881	-0.390471	0.000211684	0.000878545
114	P114	N-feruloylglycine	C12 H13 N O5	5280527				251.079	252.086	8.543		No MS2	[M+H]+1	3	●	●	●	●	●	-1.6	1.30026	1.55921	1.48907	1.35854	1.30547	1.5397	1.43102	1.47488	1.507	1.50304	1	1	1.40251	1.49113	8.27311	2.73031	1.06319	0.0883945	0.145738	0.26226
115	P115	ALA-PRO	C8 H14 N2 O3	83525	13485-59-1	HMDB28695		186.1	187.107	0.975		DDA for preferred ion	[M+H]+1	3	●	●	●	●	●	-1.27	0.685806	0.809898	0.826324	0.853713	0.855444	0.698592	0.731482	0.801775	0.735825	0.74321	1	1	0.806237	0.742177	8.68141	5.04481	0.920544	-0.119442	0.108789	0.206123
116	P116	GSK2981278	C25 H35 N O5 S	89875987	1474110-21-8			461.226	462.233	6.609		DDA for preferred ion	[M+H]+1	3	●	●	●	●	●	4.14	0.384786	0.424942	0.418288	0.426637	0.405752	0.429289	0.403066	0.419666	0.443824	0.431692	0	1	0.412081	0.425508	4.2047	3.57535	1.03258	0.0462568	0.229132	0.376096
117	P117	Sucrose, 6-[4-(1-hydroxy-1-methylethyl)-1-cyclohexene-1-carboxylate]	C22 H36 O13	131752310				508.217	509.224	7.242		DDA for preferred ion	[M+H]+1	3	●	●	●	●	●	1.96	0.480927	0.536056	0.495668	0.552658	0.565384	0.515495	0.508835	0.513218	0.538733	0.523421	1	1	0.526139	0.51994	6.92781	2.26254	0.988219	-0.0170969	0.726826	0.814249
118	P118	LAT-A	C22 H31 N O5 S					421.194	422.201	8.761		DDA for preferred ion	[M+H]+1	3	●	●	●	●	●	4.08	1.35002	2.70753	2.59934	2.67674	2.58611	0.145615	0.18678	0.165128	0.147326	0.139844	1	0	2.38395	0.156939	24.3393	12.2169	0.0658314	-3.92508	2.635e-05	0.000130286
119	P119	N-Acetyl-L-glutamate 5-semialdehyde	C7 H11 N O4	192878	13074-21-0	HMDB06488	C01250	173.069	174.076	1.353		DDA for preferred ion	[M+H]+1	3	●	●	●	●	●	-0.69	0.496519	0.594428	0.51048	0.500049	0.45766	0.588414	0.582548	0.504172	0.554149	0.547702	1	0	0.511827	0.555397	9.83313	6.04718	1.08513	0.117862	0.146028	0.26226
120	P120	Hydroxyanigorufone	C19 H12 O3	11471752	56252-02-9	HMDB0034449		288.078	289.085	7.573		DDA for preferred ion	[M+H]+1	3	●	●	●	●	●	-3.4	0.548241	0.710314	0.384677	0.576342	0.553729	0.599186	0.554688	0.573878	0.576736	0.612344	1	1	0.554661	0.583366	20.8769	3.87729	1.05175	0.072797	0.601243	0.73414
121	P121	Toluene	C7 H8	1140	108-88-3	HMDB34168	C01455	92.0629	93.0701	5.141		DDA for preferred ion	[M+H]+1	3	●	●	●	●	●	2.97	0.632284	0.436028	0.249306	0.393832	0.636803	0.675469	0.421093	0.693935	0.355109	0.269777	1	0	0.46965	0.483077	35.2806	39.7095	1.02859	0.0406652	0.908639	0.930716
122	P122	muramic acid	C9 H17 N O7	441038	484-57-1			251.1	252.107	0.854		No MS2	[M+H]+1	3	●	●	●	●	●	-1.58	0.998954	1.09098	1.15054	1.09435	1.08543	0.74336	0.710995	0.675933	0.697462	0.724623	1	1	1.08405	0.710474	5.01419	3.61892	0.655388	-0.609578	6.97499e-07	4.46958e-06
123	P123	Kanosamine	C6 H13 N O5	4255984				179.079	180.086	0.979		No MS2	[M+H]+1	3	●	●	●	●	●	-1.5	0.745573	0.683753	0.681684	0.790526	0.723765	0.595703	0.607767	0.738423	0.620603	0.700349	1	1	0.72506	0.652569	6.28098	9.6665	0.90002	-0.151971	0.070736	0.145452
124	P124	γ-L-Glutamyl-L-cysteine	C8 H14 N2 O5 S	123938	636-58-8	HMDB0001049	C00669	250.062	251.069	1.741		DDA for preferred ion	[M+H]+1	3	●	●	●	●	●	-1.36	1.61057	1.7121	1.86137	1.68006	1.62141	0.426032	0.550836	0.518728	0.466298	0.479623	1	0	1.6971	0.488303	5.94503	9.86052	0.287728	-1.79722	9.13242e-09	9.3783e-08
125	P125	Cytosine	C4 H5 N3 O	597	71-30-7	HMDB00630	C00380	111.043	112.051	0.892		No MS2	[M+H]+1	3	●	●	●	●	●	0.91	0.589592	0.687116	0.626634	0.650788	0.626835	0.641375	0.642642	0.646017	0.692882	0.666896	1	1	0.636193	0.657962	5.64376	3.35721	1.03422	0.0485413	0.281527	0.427899
126	P126	Coprine	C8 H14 N2 O4	108079	58919-61-2	HMDB0034266	C08271	202.095	203.102	0.796		No MS2	[M+H]+1	3	●	●	●	●	●	-1.89	0.610629	0.597457	0.569	0.594613	0.549174	0.588086	0.706553	0.63175	0.578192	0.673343	1	1	0.584174	0.635585	4.2283	8.62728	1.08801	0.121686	0.0923192	0.182587
127	P127	Hex-2-ulofuranosyl hexopyranosyl-(1->6)hexopyranoside	C18 H32 O16					504.168	505.175	0.813		No MS2	[M+H]+1	3	●	●	●	●	●	-2.07	0.732596	0.625233	0.758583	0.817388	0.761868	0.945736	0.784555	0.658292	0.827411	0.805771	1	1	0.739134	0.804353	9.57507	12.777	1.08824	0.121994	0.276167	0.422685
128	P128	N-(Phenylacetyl)aspartic acid	C12 H13 N O5					251.079	252.086	7.836		DDA for preferred ion	[M+H]+1	3	●	●	●	●	●	-1.24	2.25228	2.56313	2.49522	2.51667	2.47991	2.46575	2.40029	2.54625	2.52671	2.5831	1	1	2.46144	2.50442	4.91825	2.8776	1.01746	0.0249734	0.514414	0.661389
129	P129	Pyrone	C5 H4 O2	68154	504-31-4			96.0214	97.0286	1.299		DDA for preferred ion	[M+H]+1	3	●	●	●	●	●	2.35	1.40991	1.85375	1.56934	2.06552	1.64371	1.76047	1.57546	1.64566	1.58921	1.64203	1	1	1.70845	1.64257	14.9597	4.43848	0.961437	-0.056735	0.594529	0.72705
130	P130	Cellobiosan	C12 H20 O10	71225847	35405-71-1			324.105	325.112	1.169		DDA for preferred ion	[M+H]+1	3	●	●	●	●	●	-2.25	1.35494	1.21582	2.2961	1.57546	1.56017	1.4745	1.4072	1.33995	1.5274	1.54242	1	1	1.6005	1.45829	26.0325	5.81164	0.91115	-0.13424	0.475947	0.63534
131	P131	CZ415	C22 H29 N5 O4 S	71547699	1429639-50-8			459.194	460.201	0.941		DDA for preferred ion	[M+H]+1	3	●	●	●	●	●	0.41	0.32274	0.364699	0.653218	0.617137	0.360333	0.694603	0.342165	0.375642	0.418218	0.403475	1	1	0.463626	0.446821	34.0723	31.6727	0.963753	-0.0532644	0.863774	0.904251
132	P132	2-Hydroxy-5-[3-(4-methoxy-1-benzofuran-5-yl)-3-oxopropanoyl]phenyl hydrogen sulfate	C18 H14 O9 S					406.035	407.043	1.823		DDA for preferred ion	[M+H]+1	3	●	●	●	●	●	-1.33	0.891474	0.908817	0.898517	0.889612	0.859568	0.0316589	0.0308791	0.0309615	0.0347565	0.0313899	1	0	0.889598	0.0319292	2.06837	5.04936	0.0358917	-4.80021	8.26006e-14	1.65599e-11
133	P133	2-Oxopent-4-enoate	C5 H6 O3	9543147				114.032	115.039	0.987		No MS2	[M+H]+1	3	●	●	●	●	●	-0.03	0.748501	0.801611	0.789708	0.710025	0.792752	0.767218	0.732748	0.814821	0.800312	0.795624	1	0	0.76852	0.782145	5.01997	4.16373	1.01773	0.0253536	0.56292	0.699068
134	P134	Dihydrokavain	C14 H16 O3	10220256	587-63-3	HMDB29504		232.11	233.117	8.599		DDA for preferred ion	[M+H]+1	3	●	●	●	●	●	-1.37	1.84996	2.10105	1.187	2.08548	0.912948	0.670462	1.16226	1.25925	1.25757	1.26872	1	1	1.62729	1.12365	33.4915	22.8737	0.690507	-0.534272	0.0985681	0.193039
135	P135	DL-Carnitine	C7 H15 N O3	288	406-76-8,461-06-3			161.105	162.112	0.976		No MS2	[M+H]+1	3	●	●	●	●	●	-0.87	0.586173	0.639146	0.592075	0.703851	0.694277	0.78588	0.678333	0.68154	0.605482	0.695661	1	0	0.643104	0.689379	8.5768	9.33739	1.07196	0.100245	0.256974	0.404842
136	P136	VU0357121	C17 H17 F2 N O2	2296132	433967-28-3			305.122	306.129	0.996		DDA for preferred ion	[M+H]+1	3	●	●	●	●	●	-4.05	0.485748	0.575218	0.543082	0.566756	0.595313	0.565541	0.489054	0.591162	0.572441	0.520316	1	1	0.553223	0.547703	7.61239	7.64259	0.990021	-0.0144687	0.840507	0.888187
137	P137	Traumatic Acid	C12 H20 O4	5283028	6402-36-4	HMDB00933	C16308	228.136	229.143	8.572		DDA for preferred ion	[M+H]+1	3	●	●	●	●	●	-0.86	0.149296	0.129531	0.166546	0.177034	0.172225	0.924598	0.916989	0.911866	0.93946	0.950939	0	1	0.158926	0.928771	12.2642	1.7425	5.84403	2.54696	2.44937e-12	9.34265e-11
138	P138	2-Isopropylmaleate	C7 H10 O4	5280533	7596-39-6	HMDB0012241	C02631	158.058	159.065	0.882		No MS2	[M+H]+1	3	●	●	●	●	●	-0.69	0.72183	0.749315	0.765787	0.774063	0.781584	0.778453	0.72933	0.802581	0.871247	0.763128	1	0	0.758516	0.788948	3.1318	6.73395	1.04012	0.0567506	0.275947	0.422685
139	P139	Dihydrokavain	C14 H16 O3	10220256	587-63-3	HMDB29504		232.11	233.117	7.649		DDA for preferred ion	[M+H]+1	3	●	●	●	●	●	-0.67	0.619645	0.684401	0.675381	0.674137	0.651821	0.455969	0.423299	0.447266	0.458188	0.474953	1	1	0.661077	0.451935	3.94565	4.17931	0.683635	-0.548703	4.95313e-07	3.36589e-06
140	P140	Decarbamoylnovobiocin	C30 H35 N O10					569.226	570.233	1.416		DDA for preferred ion	[M+H]+1	3	●	●	●	●	●	-0.24	0.414763	0.566026	0.510991	0.492503	0.465462	0.494566	0.565643	0.405657	0.559571	0.294958	1	1	0.489949	0.464079	11.4049	24.6578	0.947198	-0.0782617	0.661717	0.769282
141	P141	(2R)-3-Hydroxy-2-[(9Z,12E)-9,12-octadecadienoyloxy]propyl 2-(trimethylammonio)ethyl phosphate	C26 H50 N O7 P					519.331	520.339	13.445		DDA for preferred ion	[M+H]+1	3	●	●	●	●	●	-1.99	1.11479	1.15666	1.20232	1.06711	1.3367	0.584389	0.517383	0.618144	0.508363	0.541828	1	1	1.17552	0.554022	8.76788	8.37406	0.471301	-1.08528	1.78106e-06	1.06465e-05
142	P142	Succinic anhydride	C4 H4 O3	7922	108-30-5	HMDB32523	C19524	100.016	101.024	2.442		DDA for preferred ion	[M+H]+1	3	●	●	●	●	●	3.13	0.868864	0.919888	1.01148	1.02183	1.02462	1.1469	1.05732	1.07647	1.13973	1.19294	1	1	0.969337	1.12267	7.31803	4.92331	1.15818	0.211865	0.00514302	0.01509
143	P143	3-Dimethylallyl-4-hydroxybenzoate	C12 H14 O3	54746231				206.094	207.101	8.76		DDA for preferred ion	[M+H]+1	3	●	●	●	●	●	-0.95	0.460572	1.03858	0.481028	0.997379	0.972531	0.093625	0.100606	0.103525	0.0886686	0.0878104	1	0	0.790017	0.0948471	37.0178	7.41144	0.120057	-3.05821	0.000716382	0.00267991
144	P144	Asarone	C12 H16 O3	636822	2883-98-9	HMDB31469	C17846	208.11	209.117	7.488		No MS2	[M+H]+1	3	●	●	●	●	●	-0.36	0.8653	0.961999	0.928705	0.906144	0.453606	0.0824365	0.0806898	0.0843959	0.0835669	0.0854033	1	0	0.823151	0.0832985	25.4573	2.18536	0.101195	-3.30479	4.80437e-05	0.000229786
145	P145	HBOA	C8 H7 N O3	322636	23520-34-5			165.043	166.05	5.849		DDA for preferred ion	[M+H]+1	3	●	●	●	●	●	0.39	0.998565	1.19689	1.08534	1.05872	1.06818	1.03845	0.995145	1.03961	1.00647	1.10027	1	1	1.08154	1.03599	6.68406	3.94783	0.957883	-0.0620792	0.254945	0.404107
146	P146	UC2976000	C12 H16 O4					224.105	225.112	8.843		No MS2	[M+H]+1	3	●	●	●	●	●	-1.44	0.512287	0.588862	0.578559	0.58177	0.588455	0.139299	0.170263	0.152171	0.153694	0.140739	1	0	0.569986	0.151233	5.71131	8.24291	0.265328	-1.91415	3.97141e-09	4.61029e-08
147	P147	(2S)-1-[(2S,3S)-3-Carboxylato-3-{[(3S)-3-carboxylato-3-hydroxypropyl]ammonio}-2-hydroxypropyl]-2-azetidinecarboxylate	C12 H18 N2 O8					318.106	319.113	4.918		DDA for preferred ion	[M+H]+1	3	●	●	●	●	●	-0.73	0.688585	0.75266	0.710919	0.741879	0.733048	0.733622	0.729091	0.740914	0.734256	0.742487	1	1	0.725418	0.736074	3.54029	0.752208	1.01469	0.0210384	0.390927	0.547434
148	P148	(2S)-3-Phenyl-2-({[(3S,4S,5R)-2,3,4-trihydroxy-5-(hydroxymethyl)tetrahydro-2-furanyl]methyl}amino)propanoic acid (non-preferred name)	C15 H21 N O7					327.132	328.139	5.304		DDA for preferred ion	[M+H]+1	3	●	●	●	●	●	-0.75	1.17758	1.39716	1.32715	1.36732	1.38683	0.740015	0.738433	0.78951	0.792582	0.773213	1	0	1.33121	0.766751	6.75715	3.4157	0.575982	-0.795904	8.83625e-07	5.5731e-06
149	P149	coenzyme Q2	C19 H26 O4	5280346	606-06-4	HMDB06709	C00399	318.183	319.19	11.71		DDA for preferred ion	[M+H]+1	3	●	●	●	●	●	-1.83	0.732398	0.795467	0.804557	0.77425	0.77876	0.760039	0.790819	0.80274	0.774263	0.469577	1	1	0.777086	0.719488	3.58268	19.5473	0.925879	-0.111105	0.395238	0.552505
150	P150	3-Dimethylallyl-4-hydroxybenzoate	C12 H14 O3	54746231				206.094	207.101	8.843		No MS2	[M+H]+1	3	●	●	●	●	●	-1.03	0.473733	0.5254	0.517347	0.502406	0.506942	0.0935001	0.0993721	0.102547	0.088506	0.0884261	1	0	0.505166	0.0944703	3.90498	6.74296	0.187009	-2.41882	7.43969e-11	1.80582e-09
151	P151	2,5-Didehydro-D-gluconate	C6 H8 O7	9548631				192.027	193.034	0.839		No MS2	[M+H]+1	3	●	●	●	●	●	-0.79	0.372007	0.368	0.408552	0.39056	0.3248	0.310539	0.298209	0.327204	0.325902	0.317049	1	1	0.372784	0.315781	8.39902	3.78276	0.847088	-0.239417	0.00521008	0.0152309
152	P152	N-Acetyl-β-D-glucosamine	C8 H15 N O6					221.09	222.097	0.875		No MS2	[M+H]+1	3	●	●	●	●	●	-1.66	0.400032	0.448008	0.427307	0.405263	0.473085	0.462978	0.443309	0.416971	0.418279	0.448187	1	1	0.430739	0.437945	7.05621	4.54817	1.01673	0.0239353	0.669222	0.774634
153	P153	Maltohexaose	C36 H62 O31					990.325	991.332	0.989		No MS2	[M+H]+1	3	●	●	●	●	●	-2.92	0.171126	0.209729	0.187227	0.154025	0.172903	0.176651	0.182947	0.15443	0.153938	0.15633	1	1	0.179002	0.164859	11.6345	8.39958	0.920991	-0.118742	0.241646	0.389104
154	P154	AZ82	C28 H31 F3 N4 O3 S	91885438	1449578-65-7			560.205	561.213	1.002		No MS2	[M+H]+1	3	●	●	●	●	●	-2.86	0.212228	0.260347	0.221639	0.179848	0.245261	0.161576	0.208721	0.16049	0.172942	0.212376	1	0	0.223865	0.183221	13.8882	13.8912	0.818444	-0.289044	0.053564	0.114413
155	P155	O-Succinyl-L-homoserine	C8 H13 N O6	439406	1492-23-5			219.074	220.081	0.872		No MS2	[M+H]+1	3	●	●	●	●	●	-1.54	0.314551	0.618154	0.613673	0.54382	0.601548	0.6881	0.697586	0.595024	0.67164	0.776209	1	1	0.538349	0.685712	23.8879	9.43952	1.27373	0.34906	0.0513656	0.1109
156	P156	(2S,4S)-4-Hydroxy-2,3,4,5-tetrahydrodipicolinate	C7 H9 N O5	70678847				187.048	188.055	0.84		No MS2	[M+H]+1	3	●	●	●	●	●	-1.66	0.429015	0.441575	0.413047	0.395258	0.355931	0.307809	0.303405	0.352556	0.341625	0.330604	1	1	0.406965	0.3272	8.20739	6.49192	0.803999	-0.314734	0.00198638	0.00638992
157	P157	1,5,7-Trimethyltetralin	C13 H18					174.141	175.148	8.4		DDA for preferred ion	[M+H]+1	3	●	●	●	●	●	-0.51	0.877153	0.928922	1.1297	0.842083	1.13697	0.652819	0.998308	0.766377	1.12814	0.793594	1	1	0.982965	0.867847	14.3162	22.0757	0.882887	-0.179699	0.310422	0.461314
158	P158	4-[(Z)-2-Aminovinyl]phenol	C8 H9 N O					135.068	136.076	2.724		DDA for preferred ion	[M+H]+1	3	●	●	●	●	●	-0.08	1.35234	1.58635	1.53842	1.55045	1.56129	1.37896	1.31321	1.43269	1.34179	1.4262	1	1	1.51777	1.37857	6.20326	3.77302	0.908286	-0.138782	0.020083	0.0502702
159	P159	(2S)-3-(1H-Imidazol-4-yl)-2-({[(3S,4S,5R)-2,3,4-trihydroxy-5-(hydroxymethyl)tetrahydro-2-furanyl]methyl}amino)propanoic acid (non-preferred name)	C12 H19 N3 O7					317.122	318.129	0.787		No MS2	[M+H]+1	3	●	●	●	●	●	-1.81	0.224362	0.216193	0.216884	0.224138	0.196553	0.182307	0.170199	0.158978	0.161118	0.154808	1	0	0.215626	0.165482	5.25939	6.62388	0.767449	-0.381858	0.00010108	0.000449807
160	P160	(2S,3S)-2,3-dihydro-3-hydroxyanthranilic acid zwitterion	C7 H9 N O3	49852385				155.058	156.065	3.035		DDA for preferred ion	[M+H]+1	3	●	●	●	●	●	-0.37	1.36604	1.55638	1.52578	1.48389	1.49332	1.63547	1.57497	1.62328	1.57028	1.60502	1	1	1.48508	1.6018	4.8767	1.79842	1.0786	0.109154	0.0101013	0.027335
161	P161	1228222	C13 H14 N2 O4					262.095	263.102	7.431		DDA for preferred ion	[M+H]+1	3	●	●	●	●	●	-0.72	0.567308	0.923469	0.983972	1.01417	1.02294	0.385837	0.802405	0.670788	0.663033	0.728985	1	1	0.902372	0.65021	21.2015	24.2991	0.720556	-0.472817	0.0526858	0.112838
162	P162	Glipizide	C21 H27 N5 O4 S	3478	29094-61-9	HMDB0015200		445.179	446.186	0.878		No MS2	[M+H]+1	3	●	●	●	●	●	0.53	0.233647	0.256634	0.268652	0.238023	0.255906	0.271298	0.266443	0.25906	0.248211	0.269841	1	1	0.250572	0.262971	5.76959	3.61628	1.04948	0.0696761	0.147791	0.264834
163	P163	Galactitol	C6 H14 O6	11850	608-66-2	HMDB00107	C01697	182.079	183.086	0.855		No MS2	[M+H]+1	3	●	●	●	●	●	-0.9	0.331378	0.352946	0.327843	0.369668	0.330214	0.0668447	0.0711154	0.059132	0.0701186	0.0726822	1	0	0.34241	0.0679786	5.3387	7.92494	0.19853	-2.33257	9.42724e-10	1.59589e-08
164	P164	Acetylblasticidin S	C19 H28 N8 O6					464.211	465.219	2.162		DDA for preferred ion	[M+H]+1	3	●	●	●	●	●	-3.91	0.742777	0.830728	0.73438	0.724095	0.715431	0.793665	0.783642	0.819032	0.859439	0.813133	1	1	0.749482	0.813782	6.21463	3.5961	1.08579	0.118748	0.0309479	0.0733092
165	P165	Penciclovir	C10 H15 N5 O3	135398748	39809-25-1	HMDB14444	C07417	253.117	254.125	5.354		DDA for preferred ion	[M+H]+1	3	●	●	●	●	●	-0.52	0.452396	0.513523	0.475676	0.497076	0.488219	0.510973	0.487466	0.497839	0.504527	0.523526	1	1	0.485378	0.504866	4.74186	2.69002	1.04015	0.0567924	0.141616	0.257376
166	P166	(2S)-3-Hydroxy-2-({[(3S,4S,5R)-2,3,4-trihydroxy-5-(hydroxymethyl)tetrahydro-2-furanyl]methyl}amino)butanoic acid (non-preferred name)	C10 H19 N O8					281.111	282.118	0.886		No MS2	[M+H]+1	3	●	●	●	●	●	-1.79	0.251958	0.335083	0.307955	0.319517	0.302592	0.292304	0.299684	0.324807	0.301966	0.295092	1	1	0.303421	0.302771	10.3321	4.25626	0.997856	-0.00309622	0.966823	0.970458
167	P167	Creatine	C4 H9 N3 O2	586	57-00-1	HMDB00064	C00300	131.069	132.077	0.933		No MS2	[M+H]+1	3	●	●	●	●	●	-1.12	0.243093	0.271748	0.288455	0.267267	0.279524	0.283898	0.266356	0.29214	0.293832	0.272188	0	1	0.270017	0.281683	6.32252	4.30042	1.0432	0.0610201	0.247972	0.397251
168	P168	Didox	C7 H7 N O4	3045	69839-83-4			169.037	170.045	2.586		DDA for preferred ion	[M+H]+1	3	●	●	●	●	●	-0.4	1.22289	1.36998	1.27715	1.32375	1.3241	1.26918	1.28643	1.33914	1.31249	1.32223	1	1	1.30357	1.30589	4.27897	2.14642	1.00178	0.00256624	0.93579	0.949153
169	P169	5-Hydroxy-DL-tryptophan	C11 H12 N2 O3	144	56-69-9,114-03-4,72572-98-6			220.085	221.092	2.442		DDA for preferred ion	[M+H]+1	3	●	●	●	●	●	-0.25	0.945075	1.07715	1.03115	1.03791	1.00473	0.991754	0.966847	1.0181	0.987556	1.01246	1	1	1.0192	0.995343	4.79535	2.06896	0.97659	-0.0341744	0.3439	0.497578
170	P170	3-Methylsulfolene	C5 H8 O2 S	70941	1193-10-8			132.024	133.032	1.562		DDA for preferred ion	[M+H]+1	3	●	●	●	●	●	-0.14	0.725094	0.770372	0.80742	0.776351	0.804003	0.475241	0.508231	0.530648	0.516777	0.538797	1	0	0.776648	0.513939	4.26682	4.80098	0.66174	-0.595664	5.83079e-07	3.82825e-06
171	P171	L-Arginino-succinate	C10 H18 N4 O6					290.122	291.129	0.85		No MS2	[M+H]+1	3	●	●	●	●	●	-1.99	0.262687	0.247897	0.271171	0.217614	0.240885	0.304409	0.268937	0.270507	0.28818	0.271008	1	0	0.248051	0.280608	8.3756	5.50425	1.13125	0.177921	0.0227687	0.056086
172	P172	Uracil	C4 H4 N2 O2	1174	66-22-8	HMDB00300	C00106	112.027	113.035	2.585		DDA for preferred ion	[M+H]+1	3	●	●	●	●	●	1.75	1.81512	1.91748	1.87499	2.04949	1.98854	2.03421	1.91304	2.04037	2.06427	1.94493	1	1	1.92912	1.99936	4.78485	3.3104	1.03641	0.0515953	0.204098	0.343868
173	P173	D-Glucopyranose	C6 H12 O6	5793	2280-44-6,54-17-1			180.063	181.07	0.808		No MS2	[M+H]+1	3	●	●	●	●	●	-1.76	1.08219	1.10797	1.05232	0.99179	1.04172	1.21665	1.08738	1.05657	1.01815	1.10389	0	1	1.0552	1.09653	4.16433	6.81009	1.03917	0.055432	0.317244	0.469709
174	P174	L-2-Aminoadipate	C6 H11 N O4	92136	1118-90-7	HMDB00510	C00956	161.069	162.076	1.72		DDA for preferred ion	[M+H]+1	3	●	●	●	●	●	-0.72	1.62732	1.70295	1.71918	1.67242	1.61565	1.49187	1.43805	1.49916	1.54598	1.09283	1	1	1.6675	1.41358	2.72411	12.9704	0.847721	-0.238338	0.0169174	0.0431555
175	P175	Aurasperone D	C31 H24 O10	155008	67924-64-5	HMDB33488	C08995	556.14	557.147	0.843		No MS2	[M+H]+1	3	●	●	●	●	●	4.65	0.342479	0.370346	0.324592	0.338487	0.28934	0.395591	0.464244	0.382744	0.379886	0.399237	1	1	0.333049	0.40434	8.87099	8.52743	1.21406	0.279837	0.00795226	0.0224287
176	P176	Senkyunolide A	C12 H16 O2	3085257				192.115	193.122	8.604		DDA for preferred ion	[M+H]+1	3	●	●	●	●	●	-0.6	0.0836344	0.0887298	0.0727427	0.135988	0.145515	1.7118	1.69484	1.70353	1.7163	1.76586	0	1	0.105322	1.71847	31.3573	1.61376	16.3163	4.02824	4.65628e-13	3.35908e-11
177	P177	3-Methyl-2-oxobutanoate	C5 H8 O3	49	759-05-7	HMDB00019	C00141	116.047	117.055	0.927		No MS2	[M+H]+1	3	●	●	●	●	●	0.57	0.413095	0.426193	0.434201	0.429973	0.468696	0.531845	0.493454	0.503437	0.454632	0.493624	1	1	0.434432	0.495398	4.76922	5.5847	1.14034	0.18946	0.00427137	0.0129108
178	P178	Senkyunolide A	C12 H16 O2	3085257				192.115	193.122	7.757		DDA for preferred ion	[M+H]+1	3	●	●	●	●	●	-0.36	1.21848	1.35405	1.37815	1.35228	1.31753	0.345253	0.313275	0.322197	0.337454	0.172415	1	1	1.3241	0.298119	4.74825	23.943	0.225149	-2.15105	9.31181e-09	9.44147e-08
179	P179	Pirbuterol	C12 H20 N2 O3	4845	38677-81-5	HMDB15407	C07807	240.147	241.154	0.928		No MS2	[M+H]+1	3	●	●	●	●	●	-1.78	0.221575	0.198533	0.222853	0.220399	0.207621	0.281298	0.236705	0.274513	0.262406	0.282833	1	1	0.214196	0.267551	4.98704	7.1135	1.24909	0.320881	0.000596969	0.00224494
180	P180	fructosylglycine	C8 H15 N O7	3081391	4429-05-4			237.084	238.092	0.967		No MS2	[M+H]+1	3	●	●	●	●	●	-2.1	0.523992	0.580073	0.558098	0.54014	0.512494	0.317137	0.251968	0.25597	0.233092	0.253894	1	0	0.54296	0.262412	4.96117	12.1671	0.4833	-1.04901	3.819e-07	2.75587e-06
181	P181	Bz-DMT-dC	C37 H35 N3 O7					633.247	634.254	1.3		DDA for preferred ion	[M+H]+1	3	●	●	●	●	●	-0.89	1.17848	1.23176	1.14987	1.1866	1.11102	1.46215	1.30639	0.433915	1.24723	1.22667	1	1	1.17155	1.13527	3.8252	35.4785	0.969038	-0.0453746	0.846365	0.8932
182	P182	N-Hydroxy-L-isoleucine	C6 H13 N O3	49852348				147.089	148.097	0.942		No MS2	[M+H]+1	3	●	●	●	●	●	-0.85	0.463633	0.571903	0.4631	0.520904	0.490494	0.541989	0.507532	0.492175	0.49341	0.565292	1	1	0.502007	0.52008	9.1075	6.20938	1.036	0.0510263	0.490873	0.64222
183	P183	(2S,3R,5S)-3-(2-Aminoethyl)-7-oxo-4-oxa-1-azabicyclo[3.2.0]heptane-2-carboxylic acid	C8 H12 N2 O4	441125				200.079	201.087	1.185		DDA for preferred ion	[M+H]+1	3	●	●	●	●	●	-1.73	1.46886	1.40918	1.21874	1.2046	1.19039	1.33154	1.33042	1.39657	1.24849	1.20355	1	1	1.29835	1.30212	10.0525	5.84607	1.0029	0.00417476	0.95696	0.962761
184	P184	Cellobiosan	C12 H20 O10	71225847	35405-71-1			324.105	325.112	1.295		No MS2	[M+H]+1	3	●	●	●	●	●	-2.05	0.558328	0.663692	0.768307	0.764637	0.760143	0.577143	0.576045	0.69433	0.656179	0.703788	1	1	0.703021	0.641497	13.0765	9.64491	0.912486	-0.132125	0.24959	0.39825
185	P185	D-Alanyl-D-alanine	C6 H12 N2 O3	5460362	923-16-0	HMDB03459	C00993	160.085	161.092	0.859		No MS2	[M+H]+1	3	●	●	●	●	●	-1.05	0.402995	0.437079	0.430635	0.363081	0.382097	0.409302	0.391019	0.366638	0.41666	0.405508	1	1	0.403177	0.397825	7.79951	4.97123	0.986726	-0.0192792	0.755593	0.835953
186	P186	Homo-L-arginine	C7 H16 N4 O2	9085	156-86-5	HMDB00670	C01924	188.127	189.134	0.842		No MS2	[M+H]+1	3	●	●	●	●	●	-1.49	0.506488	0.542799	0.516908	0.501805	0.504635	0.536979	0.519165	0.493121	0.544644	0.549187	0	1	0.514527	0.528619	3.26563	4.33369	1.02739	0.0389825	0.299585	0.450221
187	P187	2-Deoxy-L-scyllo-inosose	C6 H10 O5	10583108	78963-40-3			162.053	163.06	1.297		DDA for preferred ion	[M+H]+1	3	●	●	●	●	●	-1.72	0.532671	0.591306	0.479602	0.641606	0.486292	0.519142	0.537785	0.535528	0.438769	0.525151	1	1	0.546295	0.511275	12.7296	8.06586	0.935895	-0.0955808	0.361133	0.516549
188	P188	Spherophorol	C13 H20 O2	68142	500-67-4			208.146	209.154	7.295		DDA for preferred ion	[M+H]+1	3	●	●	●	●	●	-0.39	0.579367	0.626402	0.631906	0.633926	0.637036	0.615618	0.625027	0.600604	0.632173	0.624637	1	1	0.621727	0.619612	3.85937	1.95942	0.996597	-0.00491723	0.86474	0.904251
189	P189	MFCD28016586	C14 H25 N O4					271.178	272.185	8.198		DDA for preferred ion	[M+H]+1	3	●	●	●	●	●	-1.61	0.0393932	0.0428773	0.0429234	0.0542006	0.0539724	1.76561	1.64337	1.75568	1.74284	1.78287	0	1	0.0466733	1.73808	14.8212	3.16001	37.2392	5.21875	2.34479e-12	9.34265e-11
190	P190	N-acetyl-beta-D-glucosaminylamine	C8 H16 N2 O5	439454	18615-50-4,4229-38-3,114910-04-2,112339-01-2,112339-04-5			220.106	221.113	0.859		No MS2	[M+H]+1	3	●	●	●	●	●	-1.55	0.306004	0.339504	0.304512	0.314606	0.295796	0.309454	0.333646	0.273156	0.295626	0.305719	1	1	0.312085	0.30352	5.35659	7.24063	0.972557	-0.0401446	0.507597	0.657905
191	P191	neuraminic acid	C9 H17 N O8	441037				267.095	268.102	0.822		No MS2	[M+H]+1	3	●	●	●	●	●	-1.65	0.279657	0.264929	0.282538	0.276674	0.275348	0.254673	0.250763	0.235307	0.252246	0.245814	1	0	0.275829	0.247761	2.42806	3.09889	0.89824	-0.154827	0.000270944	0.00109058
192	P192	Levetiracetam	C8 H14 N2 O2	5284583	102767-28-2	HMDB15333	C07841	170.105	171.113	2.011		DDA for preferred ion	[M+H]+1	3	●	●	●	●	●	-0.91	2.38896	2.57745	2.40733	2.48595	2.45409	2.52924	2.43951	2.46434	2.51811	2.4643	0	1	2.46276	2.4831	3.03079	1.5545	1.00826	0.0118671	0.603057	0.734872
193	P193	Porphobilinogen	C10 H14 N2 O4	1021	487-90-1	HMDB00245	C00931	226.095	227.103	5.528		DDA for preferred ion	[M+H]+1	3	●	●	●	●	●	-0.55	0.809577	0.833626	0.82479	0.806611	0.790074	0.860413	0.822764	0.908499	0.856144	0.900979	1	1	0.812935	0.86976	2.07898	4.04732	1.0699	0.0974764	0.011632	0.0312659
194	P194	Senkyunolide I	C12 H16 O4	11521428				224.105	225.112	8.76		DDA for preferred ion	[M+H]+1	3	●	●	●	●	●	-1.4	0.489891	1.13767	0.534645	1.18099	1.12082	0.14467	0.164826	0.155897	0.15136	0.148008	1	0	0.892805	0.152952	39.0268	5.11917	0.171316	-2.54527	0.0014512	0.00486363
195	P195	Maltopentose	C30 H52 O26					828.273	829.28	0.988		No MS2	[M+H]+1	3	●	●	●	●	●	-2.28	0.211752	0.285504	0.272956	0.245172	0.233362	0.198616	0.254235	0.234686	0.219562	0.231766	1	1	0.249749	0.227773	11.9288	9.00162	0.912007	-0.132884	0.211291	0.352592
196	P196	Pyridoxal	C8 H9 N O3	1050	66-72-8	HMDB01545	C00250	167.058	168.065	0.993		DDA for preferred ion	[M+H]+1	3	●	●	●	●	●	-1.06	0.567132	0.680389	0.520092	0.497665	0.480948	0.725978	0.579883	0.688433	0.638788	0.563527	0	1	0.549245	0.639322	14.592	10.8366	1.164	0.219092	0.0937881	0.185035
197	P197	N-(2,3,4-Trihydroxybenzoyl)glycine	C9 H9 N O6					227.043	228.05	5.511		DDA for preferred ion	[M+H]+1	3	●	●	●	●	●	-0.63	0.846328	0.962453	0.880881	0.897565	0.900461	0.882907	0.852479	0.885491	0.864434	0.881937	1	1	0.897538	0.87345	4.70145	1.64673	0.973162	-0.0392479	0.261476	0.408269
198	P198	2,6-Pyridinedicarboxylic acid, 4-(((4-amino-1-carboxy-4-oxobutyl)imino)ethylidene)-1,2,3,4-tetrahydro-	C14 H17 N3 O7					339.106	340.114	5.79		DDA for preferred ion	[M+H]+1	3	●	●	●	●	●	-0.86	0.900665	0.974317	0.850182	0.933518	0.909427	0.889836	0.853249	0.894474	0.966122	0.907701	1	1	0.913622	0.902276	4.98285	4.54442	0.987582	-0.0180279	0.689698	0.794119
199	P199	DL-Carnitine	C7 H15 N O3	288	406-76-8,461-06-3			161.105	162.112	0.872		No MS2	[M+H]+1	3	●	●	●	●	●	-1.62	0.280725	0.329342	0.316374	0.315487	0.332596	0.311271	0.298244	0.317691	0.322745	0.308535	1	0	0.314905	0.311697	6.53146	2.99741	0.989814	-0.0147704	0.758997	0.837406
200	P200	2-(3-phenylpropyl)oxolane	C13 H18 O	62490	3208-40-0	HMDB36178		190.136	191.143	7.411		DDA for preferred ion	[M+H]+1	3	●	●	●	●	●	-0.3	0.862085	0.932823	0.892226	0.896476	1.00128	0.917309	0.915431	0.935159	0.947514	0.921657	1	1	0.916979	0.927414	5.82314	1.46941	1.01138	0.0163253	0.683142	0.788468
201	P201	2,6-dimethyldeca-2,4,6,8-tetraenedial	C12 H14 O2	71306353				190.099	191.106	8.199		DDA for preferred ion	[M+H]+1	3	●	●	●	●	●	-0.86	0.0254853	0.0224469	0.0205954	0.0305316	0.0307744	0.869736	0.859387	0.866895	0.886871	0.914754	0	1	0.0259667	0.879529	17.7968	2.5142	33.8714	5.082	4.29656e-13	3.35908e-11
202	P202	1,5-Anhydro-1-{3-[4-(5,7-dihydroxy-4-oxo-3,4-dihydro-2H-chromen-2-yl)phenoxy]-2,4,6-trihydroxy-5-[(2E)-3-(4-hydroxyphenyl)-2-propenoyl]phenyl}hexitol	C36 H32 O15					704.176	705.184	0.801		No MS2	[M+H]+1	3	●	●	●	●	●	3.1	0.27271	0.273794	0.292722	0.292404	0.257399	0.332552	0.350328	0.284426	0.308213	0.301276	1	1	0.277806	0.315359	5.38181	8.276	1.13518	0.18292	0.023493	0.0573716
203	P203	N6-Acetyl-L-lysine	C8 H16 N2 O3	92832	692-04-6	HMDB00206	C02727	188.116	189.123	0.901		No MS2	[M+H]+1	3	●	●	●	●	●	-1.55	0.320984	0.333744	0.31443	0.348438	0.301469	0.319305	0.339947	0.316678	0.336176	0.328725	1	1	0.323813	0.328166	5.56796	3.09919	1.01344	0.0192655	0.650746	0.764293
204	P204	1-Piperideine-2-carboxylate	C6 H9 N O2	5460387				127.063	128.071	1.496		DDA for preferred ion	[M+H]+1	3	●	●	●	●	●	0.22	0.189627	0.356839	0.645721	0.226303	0.311584	0.775107	0.760222	0.767868	0.768086	0.723683	1	1	0.346015	0.758993	52.084	2.69164	2.19353	1.13325	0.000939737	0.00343712
205	P205	MFCD00037764	C6 H13 N O6					195.074	196.081	0.797		No MS2	[M+H]+1	3	●	●	●	●	●	-1.28	0.300543	0.284569	0.285524	0.27664	0.248983	0.320962	0.296936	0.269308	0.288703	0.280024	1	1	0.279252	0.291187	6.8038	6.71451	1.04274	0.0603764	0.356317	0.510572
206	P206	Cetirizine	C21 H25 Cl N2 O3	2678	83881-51-0	HMDB05032	C07778	388.157	389.164	0.869		No MS2	[M+H]+1	3	●	●	●	●	●	4.43	0.232943	0.255	0.265381	0.241694	0.259797	0.304403	0.276207	0.306251	0.346666	0.318178	1	0	0.250963	0.310341	5.31938	8.21208	1.2366	0.306381	0.00172143	0.00567435
207	P207	Aniline	C6 H7 N	6115				93.058	94.0653	0.927		No MS2	[M+H]+1	3	●	●	●	●	●	1.79	0.392008	0.414038	0.398073	0.463768	0.427985	0.37264	0.328765	0.459475	0.466947	0.368344	1	0	0.419174	0.399234	6.82712	15.2573	0.95243	-0.0703152	0.526261	0.671234
208	P208	etofylline	C9 H12 N4 O3	1892	519-37-9			224.091	225.098	0.861		No MS2	[M+H]+1	3	●	●	●	●	●	-1.5	0.210878	0.225036	0.232222	0.222691	0.223402	0.246871	0.242115	0.243633	0.234603	0.233253	1	1	0.222846	0.240095	3.44895	2.45956	1.0774	0.107558	0.00406536	0.0123816
209	P209	Kanosamine	C6 H13 N O5	4255984				179.079	180.086	0.874		No MS2	[M+H]+1	3	●	●	●	●	●	-1.54	1.12775	1.27355	1.23037	1.2477	1.43252	0.193982	0.174143	0.176157	0.201984	0.165842	1	1	1.26238	0.182422	8.71718	8.21822	0.144506	-2.7908	2.11018e-08	1.94283e-07
210	P210	(2S)-2-Isopropylmalate	C7 H12 O5	5280523				176.068	177.076	0.882		DDA for preferred ion	[M+H]+1	3	●	●	●	●	●	-1.05	1.19556	1.31543	1.3158	1.29187	1.25128	1.39052	1.29034	1.33473	1.44478	1.34216	1	1	1.27399	1.36051	4.01232	4.33705	1.06791	0.0947958	0.0382181	0.0863699
211	P211	D-gamma-Glutamyl-D-gamma-glutamyl-D-gamma-glutamyl-5-oxo-D-norvaline	C20 H30 N4 O12					518.184	519.191	0.864		DDA for preferred ion	[M+H]+1	3	●	●	●	●	●	-4.68	6.00502	6.86329	7.10935	6.53445	6.70761	6.90447	7.40069	6.96312	7.4876	6.6968	1	1	6.64394	7.09054	6.24664	4.78129	1.06722	0.0938548	0.0994009	0.193979
212	P212	Maleamate	C4 H5 N O3	5280451	557-24-4			115.027	116.034	0.809		DDA for preferred ion	[M+H]+1	3	●	●	●	●	●	0.16	1.93389	2.11561	2.03805	1.97801	1.88402	1.93393	1.94359	1.96443	1.90094	1.94707	1	1	1.98992	1.93799	4.5374	1.21057	0.973905	-0.0381466	0.24849	0.397286
213	P213	Pyrone	C5 H4 O2	68154	504-31-4			96.0213	97.0286	0.872		DDA for preferred ion	[M+H]+1	3	●	●	●	●	●	2.11	3.04939	3.30888	3.27418	3.18334	3.29381	2.55721	2.41569	2.47566	2.67247	2.55821	1	1	3.22192	2.53585	3.35415	3.82746	0.787061	-0.345453	5.63729e-06	3.09279e-05
214	P214	R59949	C28 H25 F2 N3 O S	657356	120166-69-0			489.168	490.176	0.841		DDA for preferred ion	[M+H]+1	3	●	●	●	●	●	-0.52	2.27168	2.45254	2.46841	2.45434	2.3149	1.92678	1.94618	1.09202	2.03442	2.00191	1	0	2.39238	1.80026	3.843	22.1215	0.7525	-0.410236	0.0118884	0.0316365
215	P215	N-Hydroxy-L-valine	C5 H11 N O3	22859864	19944-63-9			133.074	134.081	0.852		DDA for preferred ion	[M+H]+1	3	●	●	●	●	●	-1.15	10.0221	8.45083	9.05271	9.22616	10.5598	9.0544	9.39415	7.87456	8.88245	8.50475	1	1	9.46234	8.74206	8.78591	6.64881	0.92388	-0.114223	0.15101	0.269396
216	P216	2-Aminoprop-2-enoate	C3 H5 N O2	123991	1948-56-7			87.0323	88.0396	0.811		DDA for preferred ion	[M+H]+1	3	●	●	●	●	●	3.01	1.85803	2.00771	1.88203	1.84064	1.68804	1.93273	1.96639	1.90417	1.88485	1.89557	0	1	1.85529	1.91675	6.1539	1.71929	1.03313	0.0470161	0.280862	0.427701
217	P217	hercynine	C9 H15 N3 O2	5459798	534-30-5	HMDB29422	C05575	197.116	198.123	0.787		DDA for preferred ion	[M+H]+1	3	●	●	●	●	●	-1.29	4.67076	4.92489	4.63396	4.5265	4.35817	5.13701	5.23099	4.86098	4.70929	4.53611	1	1	4.62286	4.89487	4.49842	5.92025	1.05884	0.0824877	0.126532	0.23407
218	P218	benzoquinone	C6 H4 O2	4650	106-51-4	HMDB03364	C00472	108.021	109.028	0.987		No MS2	[M+H]+1	3	●	●	●	●	●	0.57	1.41558	1.59962	1.59379	1.42485	1.59852	1.41407	1.36373	1.63629	1.53389	1.48964	1	1	1.52647	1.48752	6.35973	7.13083	0.974484	-0.037289	0.561509	0.698504
219	P219	5-Hydroxy-2-furoic acid	C5 H4 O4	4161539	97529-85-6			128.011	129.018	1.775		DDA for preferred ion	[M+H]+1	3	●	●	●	●	●	-0.81	25.0937	26.5396	26.2432	25.2313	25.1624	0.320145	0.287474	0.28174	0.265714	0.261086	1	0	25.654	0.283232	2.66213	8.24262	0.0110404	-6.50106	4.94271e-13	3.35908e-11
220	P220	Cellobiosan	C12 H20 O10	71225847	35405-71-1			324.105	325.112	0.867		DDA for preferred ion	[M+H]+1	3	●	●	●	●	●	-2.26	1.95732	2.24904	2.21472	2.16745	2.13098	1.97637	1.97683	1.92638	2.13984	1.92455	1	1	2.1439	1.98879	5.2979	4.43617	0.927652	-0.108345	0.0424065	0.0948815
221	P221	2-Deoxy-L-scyllo-inosose	C6 H10 O5	10583108	78963-40-3			162.053	163.06	0.988		DDA for preferred ion	[M+H]+1	3	●	●	●	●	●	-2.01	6.00901	7.01114	6.14564	6.18769	6.63051	6.2585	6.16783	6.4784	5.77289	6.25062	1	1	6.3968	6.18565	6.48914	4.16828	0.966992	-0.0484247	0.362238	0.516999
222	P222	beta-D-Fructofuranosyl alpha-D-galactopyranosyl-(1->4)-[alpha-D-galactopyranosyl-(1->6)]-alpha-D-glucopyranoside	C24 H42 O21					666.22	667.227	0.986		DDA for preferred ion	[M+H]+1	3	●	●	●	●	●	-2.45	1.07741	1.47585	1.23881	1.11238	1.23684	1.00563	1.21386	1.1736	1.15605	1.12151	1	1	1.22826	1.13413	12.7222	6.97977	0.923364	-0.115029	0.263887	0.410523
223	P223	6-(alpha-D-glucosaminyl)-1D-myo-inositol	C12 H23 N O10	445937				341.131	342.139	0.982		DDA for preferred ion	[M+H]+1	3	●	●	●	●	●	-2.42	1.25385	1.54553	1.52908	1.46413	1.463	1.3128	1.37642	1.38794	1.44568	1.39565	1	1	1.45112	1.3837	8.02293	3.44367	0.95354	-0.0686341	0.26506	0.410523
224	P224	Iprobenfos	C13 H21 O3 P S	33294	26087-47-8	HMDB0031768	C15230	288.095	289.102	0.966		DDA for preferred ion	[M+H]+1	3	●	●	●	●	●	0.83	0.80677	0.987452	0.81608	0.868674	0.890814	0.879114	0.878973	0.928968	0.903417	0.869158	1	1	0.873958	0.891926	8.30188	2.72009	1.02056	0.02936	0.613704	0.743686
225	P225	1D-myo-Inositol 3-monophosphate	C6 H13 O9 P	440194				260.029	261.037	0.803		No MS2	[M+H]+1	3	●	●	●	●	●	-1.86	1.96858	1.89314	1.9505	2.10262	1.85443	1.54985	1.63514	1.57455	1.39183	1.4623	1	1	1.95385	1.52273	4.85061	6.30278	0.779349	-0.359659	9.73703e-05	0.000435719
226	P226	MFCD00153866	C6 H9 N O4					159.053	160.06	0.878		DDA for preferred ion	[M+H]+1	3	●	●	●	●	●	-1.31	1.30822	1.4395	1.40908	1.42066	1.47036	1.38684	1.32353	1.35748	1.38367	1.31358	1	1	1.40957	1.35302	4.34265	2.48678	0.959884	-0.0590682	0.107861	0.205706
227	P227	3-[(Dimethylamino)(oxo)acetyl]-1H-indol-4-yl acetate	C14 H14 N2 O4					274.095	275.102	0.93		DDA for preferred ion	[M+H]+1	3	●	●	●	●	●	-2.24	4.32262	4.85276	5.15423	5.38869	5.36691	4.93449	4.56586	5.10576	5.65202	5.15971	1	1	5.01704	5.08357	8.84989	7.74256	1.01326	0.0190047	0.808356	0.866791
228	P228	2-Acetamidohexanedioic acid	C8 H13 N O5					203.079	204.086	0.994		No MS2	[M+H]+1	3	●	●	●	●	●	-1.5	1.29212	1.44595	1.2592	1.22517	1.34056	1.06604	1.06276	1.03178	1.00441	1.13128	1	1	1.3126	1.05925	6.5403	4.48024	0.806989	-0.309378	0.000416812	0.00162861
229	P229	Dihydrothymine	C5 H8 N2 O2	93556	696-04-8			128.058	129.066	0.907		No MS2	[M+H]+1	3	●	●	●	●	●	-0.84	1.33225	1.46481	1.393	1.53117	1.44928	1.45915	1.41662	1.45203	1.50873	1.59687	1	1	1.4341	1.48668	5.24809	4.6957	1.03666	0.0519465	0.285198	0.43184
230	P230	1,2-Benzoquinone	C6 H4 O2	11421	583-63-1	HMDB12133	C02351	108.021	109.028	0.881		DDA for preferred ion	[M+H]+1	3	●	●	●	●	●	0.78	11.2353	12.1677	12.0421	11.9805	11.7386	12.0411	11.0735	12.2389	12.6366	12.1028	1	1	11.8329	12.0186	3.11555	4.79991	1.0157	0.0224694	0.560907	0.698504
231	P231	(R)-3-Methylitaconate	C6 H8 O4	90658751				144.042	145.049	0.987		No MS2	[M+H]+1	3	●	●	●	●	●	-1.98	7.81424	8.57681	7.86901	8.4338	8.87859	8.34565	8.09798	8.27848	7.56298	8.34852	1	1	8.31449	8.12672	5.54417	4.07548	0.977417	-0.0329544	0.480624	0.638441
232	P232	Furfuranol	C5 H6 O2	7361	98-00-0	HMDB0034245	C20441	98.0369	99.0442	0.986		DDA for preferred ion	[M+H]+1	3	●	●	●	●	●	1.41	1.24128	1.31566	1.17428	1.27362	1.20831	1.24274	1.13024	1.18667	1.1825	1.20544	0	1	1.24263	1.18952	4.43441	3.42972	0.957259	-0.0630186	0.121485	0.226301
233	P233	N-Acetyl-L-glutamate 5-semialdehyde	C7 H11 N O4	192878	13074-21-0	HMDB06488	C01250	173.069	174.076	1.041		DDA for preferred ion	[M+H]+1	3	●	●	●	●	●	-1.05	1.4723	1.4402	1.4363	1.45724	1.5691	1.54614	1.51224	1.44768	1.41807	1.54207	1	0	1.47503	1.49324	3.69571	3.85728	1.01235	0.017705	0.621452	0.747367
234	P234	D-Alanyl-D-alanine	C6 H12 N2 O3	5460362	923-16-0	HMDB03459	C00993	160.085	161.092	0.949		DDA for preferred ion	[M+H]+1	3	●	●	●	●	●	-1.33	1.76821	1.97824	1.93856	1.86324	1.83439	1.85877	1.87456	1.53728	1.86199	1.83193	1	1	1.87653	1.7929	4.44894	8.01711	0.955438	-0.0657662	0.29325	0.442361
235	P235	3-Amino-6-chloropyridazine	C4 H4 Cl N3	21643	5469-69-2,393353-55-4			129.009	130.017	0.674		No MS2	[M+H]+1	3	●	●	●	●	●	0.44	4.81	5.99201	6.88922	5.46853	6.19653	0.230933	0.203299	0.215251	0.210426	0.231185	1	1	5.87126	0.218219	13.3164	5.71404	0.0371673	-4.74982	2.15428e-07	1.62303e-06
236	P236	Methyl alpha-D-glucoside	C7 H14 O6					194.079	195.086	0.883		DDA for preferred ion	[M+H]+1	3	●	●	●	●	●	-1.3	15.1535	16.2668	16.2594	16.5298	16.0796	16.8896	16.2049	17.1743	17.368	16.3414	1	1	16.0578	16.7956	3.30304	3.02883	1.04595	0.0648105	0.0550049	0.116867
237	P237	Citrate	C6 H8 O7	31348	126-44-3,2572-63-6			192.027	193.034	1.78		DDA for preferred ion	[M+H]+1	3	●	●	●	●	●	-0.94	16.8227	17.9069	17.6742	17.3301	17.0307	0.0171187	0.0145443	0.0235605	0.0157175	0.0147094	1	0	17.3529	0.0171301	2.56992	21.8215	0.000987158	-9.98443	3.42393e-13	3.35908e-11
238	P238	N-[3-Carboxy-2-(carboxymethyl)-2-hydroxypropanoyl]glutamic acid	C11 H15 N O10					321.069	322.076	1.886		DDA for preferred ion	[M+H]+1	3	●	●	●	●	●	-1.49	6.29941	7.40213	6.77785	6.34274	6.31671	0.0112159	0.0110735	0.0112124	0.0115121	0.0102783	1	0	6.62777	0.0110584	7.18859	4.20065	0.0016685	-9.22723	1.25711e-09	1.89163e-08
239	P239	Glipizide	C21 H27 N5 O4 S	3478	29094-61-9	HMDB0015200		445.179	446.186	0.971		DDA for preferred ion	[M+H]+1	3	●	●	●	●	●	0.31	1.29021	1.76481	1.54227	1.57887	1.63975	1.41055	1.44373	1.4569	1.40178	1.51222	1	1	1.56318	1.44504	11.1591	3.03969	0.92442	-0.11338	0.180121	0.310273
240	P240	7,8-dihydro-8-oxoguanine	C5 H5 N5 O2	135420630	5614-64-2	HMDB0011613	C20155	167.044	168.051	1.031		DDA for preferred ion	[M+H]+1	3	●	●	●	●	●	-1.3	2.43308	2.60779	2.46717	2.2934	2.47285	2.52166	2.53415	2.4261	2.55355	2.66961	1	1	2.45486	2.54101	4.57286	3.42644	1.0351	0.0497647	0.212106	0.352811
241	P241	fosfocreatinine	C4 H8 N3 O4 P	135504827	5786-71-0			193.025	194.032	0.76		DDA for preferred ion	[M+H]+1	3	●	●	●	●	●	-0.34	2.51927	2.70169	2.80058	2.79903	2.6977	2.85946	2.87584	3.02752	2.94718	3.02297	1	1	2.70365	2.94659	4.23847	2.68203	1.08986	0.124139	0.00452876	0.0134853
242	P242	(2S,3R,5S)-3-(2-Aminoethyl)-7-oxo-4-oxa-1-azabicyclo[3.2.0]heptane-2-carboxylic acid	C8 H12 N2 O4	441125				200.079	201.087	1.004		DDA for preferred ion	[M+H]+1	3	●	●	●	●	●	-1.54	5.26476	4.83264	6.30345	4.77514	4.85448	4.56114	6.21928	4.5529	5.95723	5.12172	1	1	5.20609	5.28245	12.3608	14.6982	1.01467	0.0210072	0.869749	0.90727
243	P243	gamma-Glutamyl-N~5~-acetylornithine	C12 H21 N3 O6					303.142	304.15	0.791		DDA for preferred ion	[M+H]+1	3	●	●	●	●	●	-2	3.22464	3.48541	3.18003	3.28347	3.05581	3.68329	3.45791	3.30759	3.33337	3.21117	1	1	3.24587	3.39867	4.86403	5.34972	1.04707	0.0663634	0.193701	0.328717
244	P244	(2Z)-2-Aminobut-2-enoate	C4 H7 N O2	45259183				101.048	102.055	0.841		DDA for preferred ion	[M+H]+1	3	●	●	●	●	●	2.09	3.41078	3.5576	3.69046	3.74341	3.64221	3.58422	3.48615	3.50557	3.55311	3.50443	1	1	3.60889	3.5267	3.60589	1.1512	0.977224	-0.0332388	0.214495	0.35498
245	P245	CYCLOTETRAGLUCOSE	C24 H40 O20	11686063				648.21	649.217	0.983		DDA for preferred ion	[M+H]+1	3	●	●	●	●	●	-2.41	2.5172	3.19567	2.59415	2.5939	2.70514	2.34801	3.12132	2.62625	2.56662	2.46256	1	1	2.72121	2.62495	10.0529	11.3147	0.964626	-0.0519577	0.608484	0.738478
246	P246	7,8-dihydro-8-oxoguanine	C5 H5 N5 O2	135420630	5614-64-2	HMDB0011613	C20155	167.044	168.051	1.405		DDA for preferred ion	[M+H]+1	3	●	●	●	●	●	-1.14	6.35816	7.04862	6.7068	6.38749	6.35545	6.84601	6.43114	6.35742	6.49178	7.06684	1	1	6.57131	6.63864	4.64078	4.5817	1.01025	0.0147075	0.735689	0.819281
247	P247	(S)-4-Amino-5-oxopentanoate	C5 H9 N O3	16722117				131.058	132.065	0.832		No MS2	[M+H]+1	3	●	●	●	●	●	-0.77	1.25426	1.34184	1.27022	1.27124	1.23221	1.28137	1.34261	1.30211	1.38624	1.39554	1	1	1.27395	1.34157	3.2269	3.74384	1.05308	0.0746156	0.0481864	0.105966
248	P248	glu-ser	C8 H14 N2 O6	6995653	5875-38-7	HMDB28828		234.085	235.092	0.902		DDA for preferred ion	[M+H]+1	3	●	●	●	●	●	-1.97	5.2235	5.39011	5.1644	5.46265	5.19806	5.27178	4.91599	5.29998	5.4159	5.21772	1	1	5.28774	5.22427	2.47399	3.57835	0.987997	-0.0174215	0.551251	0.693602
249	P249	L-Alanyl-3-{[(2E)-4-amino-4-oxo-2-butenoyl]amino}-L-alanine	C10 H16 N4 O5	6439822				272.111	273.119	0.865		DDA for preferred ion	[M+H]+1	3	●	●	●	●	●	-2.36	4.69305	5.03612	5.0268	4.57545	4.5318	5.20876	5.15818	5.05729	5.03976	5.00065	1	1	4.77265	5.09293	5.10276	1.70857	1.06711	0.093705	0.0243258	0.0590452
250	P250	GLPG1690	C30 H33 F N8 O2 S	90420193	1628260-79-6			588.242	589.249	6.879		DDA for preferred ion	[M+H]+1	3	●	●	●	●	●	-2.27	6.74885	7.84972	7.6081	8.01933	7.94087	7.16099	7.51456	7.45579	7.9136	7.78689	1	1	7.63337	7.56637	6.78617	3.90075	0.991222	-0.0127201	0.807907	0.866791
251	P251	2-Acetamidohexanedioic acid	C8 H13 N O5					203.079	204.086	0.883		DDA for preferred ion	[M+H]+1	3	●	●	●	●	●	-1.05	1.962	2.19259	2.21817	2.08509	2.11202	1.86508	1.84592	1.79465	1.93739	1.82573	1	1	2.11397	1.85375	4.78747	2.88768	0.876904	-0.189509	0.000950458	0.00346053
252	P252	N-Hydroxy-L-valine	C5 H11 N O3	22859864	19944-63-9			133.074	134.081	0.935		No MS2	[M+H]+1	3	●	●	●	●	●	-0.16	2.28704	2.67485	2.13616	2.31893	2.17817	2.67851	2.27497	2.61298	2.2526	2.19054	1	1	2.31903	2.40192	9.17063	9.40549	1.03574	0.0506668	0.566769	0.701751
253	P253	Acetone cyanohydrin	C4 H7 N O	6406	75-86-5			85.053	86.0603	0.95		DDA for preferred ion	[M+H]+1	3	●	●	●	●	●	3.37	1.75491	1.97924	2.06427	2.01274	2.00009	1.99598	1.96301	2.00257	2.07076	2.16458	1	1	1.96225	2.03938	6.11905	3.93284	1.03931	0.0556239	0.266507	0.410523
254	P254	Glycylprolylhydroxyproline	C12 H19 N3 O5	11778669	2239-67-0	HMDB0002171		285.132	286.139	0.796		DDA for preferred ion	[M+H]+1	3	●	●	●	●	●	-2.15	4.08679	4.00234	4.26835	3.99637	3.76967	4.1714	4.50709	4.22968	4.19926	4.084	1	1	4.0247	4.23828	4.47175	3.77015	1.05307	0.0745979	0.0824905	0.166017
255	P255	Dp44mT	C14 H15 N5 S	10334137	152095-12-0			285.105	286.113	0.947		DDA for preferred ion	[M+H]+1	3	●	●	●	●	●	2.05	1.40241	1.55592	1.53898	1.48487	1.60411	1.56704	1.48056	1.60022	1.72829	1.59553	0	1	1.51726	1.59433	5.07838	5.58104	1.0508	0.0714821	0.181318	0.311665
256	P256	3-(alpha-D-galactosyl)ononitol	C13 H24 O11	10713243				356.131	357.138	0.891		DDA for preferred ion	[M+H]+1	3	●	●	●	●	●	-2.06	2.92629	3.03871	3.18077	3.11381	2.96322	3.10061	3.13709	3.20141	3.31495	3.03381	1	1	3.04456	3.15757	3.44429	3.38402	1.03712	0.0525835	0.129896	0.239739
257	P257	LU3453000	C4 H4 O2					84.0214	85.0287	0.873		DDA for preferred ion	[M+H]+1	3	●	●	●	●	●	3.37	3.72137	3.97626	3.90142	3.83916	3.79812	2.80832	2.51083	2.765	2.94854	2.76465	1	1	3.84727	2.75947	2.53019	5.73021	0.717254	-0.479444	1.09618e-06	6.8597e-06
258	P258	2,5-Furandicarboxylic acid	C6 H4 O5	76720	3238-40-2	HMDB0000578	C20450	156.006	157.013	1.779		DDA for preferred ion	[M+H]+1	3	●	●	●	●	●	-0.8	7.74677	8.28789	8.19804	7.93546	7.89632	0.0365385	0.00997111	0.0116077	0.0343507	0.0093195	1	0	8.01289	0.0203575	2.79275	67.8838	0.00254059	-8.62062	6.84008e-13	3.65276e-11
259	P259	4-(γ-L-Glutamylamino)butanoate	C9 H16 N2 O5					232.106	233.113	1.711		DDA for preferred ion	[M+H]+1	3	●	●	●	●	●	-1.25	28.6392	34.6995	34.8063	30.5497	33.7407	24.7424	24.5667	25.3473	26.2628	27.5023	1	1	32.4871	25.6843	8.4866	4.7244	0.790601	-0.338978	0.000989457	0.00357007
260	P260	(S)-Lactate	C3 H6 O3	107689	79-33-4	HMDB0003328	C00186	90.0319	91.0392	0.989		DDA for preferred ion	[M+H]+1	3	●	●	●	●	●	2.09	1.45275	1.60743	1.56935	1.5438	1.57765	1.6057	1.57421	1.65108	1.45742	1.51801	1	1	1.55019	1.56128	3.8073	4.84242	1.00715	0.0102845	0.802509	0.865658
261	P261	N~6~-(Carboxymethyl)-L-lysine	C8 H16 N2 O4					204.111	205.118	0.975		DDA for preferred ion	[M+H]+1	3	●	●	●	●	●	-1.5	2.24807	2.82205	2.59889	2.66403	2.83408	2.535	2.48238	2.72845	2.50261	2.62238	1	1	2.63342	2.57416	9.03555	3.94296	0.977498	-0.0328344	0.622339	0.747367
262	P262	tranexamic acid	C8 H15 N O2	5526	1197-18-8	HMDB14447	C12535	157.11	158.117	1.208		DDA for preferred ion	[M+H]+1	3	●	●	●	●	●	-1.42	71.6298	83.0229	78.2591	76.732	77.906	84.5056	74.7824	81.5129	83.018	78.9485	1	1	77.51	80.5535	5.2522	4.74726	1.03927	0.0555649	0.257765	0.404842
263	P263	STF-31	C23 H25 N3 O3 S	984333	724741-75-7			423.164	424.171	7.25		DDA for preferred ion	[M+H]+1	3	●	●	●	●	●	4.44	3.00622	3.30603	3.07408	3.49133	3.53096	3.35477	3.22325	3.2252	3.47512	3.34224	1	1	3.28172	3.32412	7.23762	3.15613	1.01292	0.0185166	0.72453	0.813782
264	P264	Piperidine	C5 H11 N	8082	110-89-4	HMDB34301	C01746	85.0895	86.0968	2.612		DDA for preferred ion	[M+H]+1	3	●	●	●	●	●	4.14	6.45412	5.50782	6.44862	6.60299	6.68703	4.37921	4.48101	4.41949	4.24264	4.37821	1	1	6.34012	4.38011	7.51039	1.99796	0.690857	-0.533541	1.77552e-05	9.11659e-05
265	P265	Pyrone	C5 H4 O2	68154	504-31-4			96.0213	97.0286	0.988		DDA for preferred ion	[M+H]+1	3	●	●	●	●	●	1.59	15.0227	16.6346	15.973	16.3293	16.5959	15.9721	15.5244	16.3562	15.2038	15.6888	1	1	16.1111	15.749	4.11771	2.78553	0.977526	-0.0327924	0.338491	0.49118
266	P266	(1S,2S,3R,4S,5R,6S)-2,3,4,6-Tetrahydroxy-5-methoxycyclohexyl alpha-D-galactopyranosyl-(1->6)-alpha-D-galactopyranosyl-(1->6)-alpha-D-galactopyranoside	C25 H44 O21					680.236	681.243	0.862		No MS2	[M+H]+1	3	●	●	●	●	●	-1.94	0.782048	0.970296	1.0017	0.86695	0.991611	0.939389	1.06213	0.948486	1.03532	0.923993	1	1	0.922522	0.981865	10.3045	6.35391	1.06433	0.0899421	0.276807	0.422685
267	P267	Phosphate	H3 O4 P	1061	14265-44-2	HMDB0000973	C00009	97.977	98.9843	0.811		DDA for preferred ion	[M+H]+1	3	●	●	●	●	●	1.49	22.9462	22.5674	23.6023	24.4107	23.4443	22.8143	22.2984	22.2511	21.841	22.3331	1	1	23.3942	22.3076	2.99485	1.55027	0.953553	-0.0686146	0.0144522	0.0373427
268	P268	6-Azidocaproic acid	C6 H11 N3 O2					157.085	158.092	2.193		DDA for preferred ion	[M+H]+1	3	●	●	●	●	●	-0.26	5.32231	6.14438	6.02032	6.13959	5.98587	6.79931	5.79949	6.44239	6.40747	6.89652	1	1	5.92249	6.46903	5.78888	6.66957	1.09228	0.127345	0.0573954	0.121624
269	P269	2-Methylbutyronitrile	C5 H9 N	29339				83.0738	84.0811	1.419		DDA for preferred ion	[M+H]+1	3	●	●	●	●	●	3.42	44.6582	45.6664	48.3675	44.5022	40.0593	46.4372	45.5976	43.0371	43.3022	46.5147	1	1	44.6507	44.9777	6.71413	3.76168	1.00732	0.0105278	0.83709	0.885745
270	P270	4-(γ-L-Glutamylamino)butanoate	C9 H16 N2 O5					232.106	233.113	2.132		DDA for preferred ion	[M+H]+1	3	●	●	●	●	●	-1.29	71.0253	76.8392	76.2746	76.3156	75.0385	74.4937	70.1193	74.8186	76.3422	76.0165	1	1	75.0986	74.3581	3.15737	3.35435	0.990139	-0.0142972	0.643277	0.758094
271	P271	Acetone cyanohydrin	C4 H7 N O	6406	75-86-5			85.053	86.0603	0.857		No MS2	[M+H]+1	3	●	●	●	●	●	3.2	1.18868	1.34676	1.53773	1.35187	1.40864	1.34081	1.29667	1.26839	1.34117	1.31612	1	1	1.36674	1.31263	9.20567	2.35815	0.960413	-0.0582732	0.377764	0.532727
272	P272	2-Methylbutyronitrile	C5 H9 N	29339				83.0738	84.081	1.076		DDA for preferred ion	[M+H]+1	3	●	●	●	●	●	3.03	74.991	84.607	82.7609	72.9928	85.5913	82.516	78.8752	84.7151	86.6295	76.1294	1	1	80.1886	81.773	7.2212	5.22568	1.01976	0.0282277	0.635734	0.755524
273	P273	Piperidine	C5 H11 N	8082	110-89-4	HMDB34301	C01746	85.0895	86.0968	2.864		DDA for preferred ion	[M+H]+1	3	●	●	●	●	●	3.9	4.20309	4.86798	5.33031	5.30939	5.17043	2.41137	2.31737	2.58374	2.55509	2.65912	1	1	4.97624	2.50534	9.44459	5.51743	0.50346	-0.990052	3.43462e-06	1.93741e-05
274	P274	oxiracetam	C6 H10 N2 O3	4626	62613-82-5			158.069	159.076	0.837		No MS2	[M+H]+1	3	●	●	●	●	●	-1.29	1.48613	1.5761	1.49907	1.3659	1.32663	1.4349	1.46498	1.37421	1.45353	1.42648	1	1	1.45077	1.43082	7.05498	2.45194	0.986252	-0.0199721	0.691013	0.794119
275	P275	6-Oxo-pipecolinic acid	C6 H9 N O3	3014237	3770-22-7			143.058	144.065	4.447		DDA for preferred ion	[M+H]+1	3	●	●	●	●	●	-0.56	5.5318	6.11725	5.78664	5.97759	5.7212	5.93818	5.61711	5.89376	5.72074	6.01383	1	1	5.8269	5.83672	3.90304	2.79687	1.00169	0.00243041	0.93938	0.949958
276	P276	tranexamic acid	C8 H15 N O2	5526	1197-18-8	HMDB14447	C12535	157.11	158.117	1.471		DDA for preferred ion	[M+H]+1	3	●	●	●	●	●	-1.41	105.973	114.671	110.596	105.318	105.926	111.289	108.58	106.657	106.706	113.514	1	1	108.496	109.349	3.73292	2.74098	1.00786	0.0112918	0.715018	0.807977
277	P277	tranexamic acid	C8 H15 N O2	5526	1197-18-8	HMDB14447	C12535	157.11	158.117	1.06		DDA for preferred ion	[M+H]+1	3	●	●	●	●	●	-1.55	103.181	104.553	110.653	110.05	110.455	99.1709	104.094	101.046	104.85	112.735	1	1	107.778	104.379	3.34922	4.98624	0.968461	-0.0462349	0.264446	0.410523
278	P278	α,α-Trehalose	C12 H22 O11					342.116	343.123	0.81		No MS2	[M+H]+1	3	●	●	●	●	●	-2.02	1.54256	1.61069	1.59909	1.68664	1.60007	1.39265	1.379	1.38588	1.41589	1.38364	1	1	1.60781	1.39141	3.20414	1.04507	0.865409	-0.208547	1.79436e-05	9.15467e-05
279	P279	trans-Cinnamate	C9 H8 O2	444539	140-10-3	HMDB00930	C10438	148.052	149.06	5.156		DDA for preferred ion	[M+H]+1	3	●	●	●	●	●	-0.66	3.39201	3.66795	3.55215	3.7104	3.74739	3.45851	3.40002	3.57444	3.51014	3.56232	0	1	3.61398	3.50109	3.98828	2.08132	0.968762	-0.0457854	0.156683	0.277662
280	P280	4-Aminobutanoate	C4 H9 N O2	119	56-12-2	HMDB00112	C00334	103.064	104.071	0.85		DDA for preferred ion	[M+H]+1	3	●	●	●	●	●	2.91	13.8824	15.1595	15.8595	14.7851	15.0424	15.5308	14.8791	14.8793	15.2297	15.2311	1	1	14.9458	15.15	4.78576	1.82144	1.01366	0.0195794	0.567884	0.701967
281	P281	2′-O-methylcytidine	C10 H15 N3 O5					257.102	258.11	0.835		DDA for preferred ion	[M+H]+1	3	●	●	●	●	●	4.43	13.3518	14.4036	14.5939	14.5083	13.7423	15.8599	16.5045	14.8846	15.986	16.0792	1	1	14.12	15.8628	3.86042	3.77008	1.12343	0.167911	0.00132797	0.00454575
282	P282	1-Methylpseudouridine	C10 H14 N2 O6	99543	13860-38-3			258.085	259.092	1.951		DDA for preferred ion	[M+H]+1	3	●	●	●	●	●	-1.78	41.4638	47.6174	47.218	45.9412	46.0841	49.6909	48.8909	50.7821	50.8831	52.3292	1	1	45.6649	50.5153	5.37804	2.58389	1.10622	0.145633	0.00454679	0.0134888
283	P283	Cellobiosan	C12 H20 O10	71225847	35405-71-1			324.105	325.112	0.987		DDA for preferred ion	[M+H]+1	3	●	●	●	●	●	-2.45	12.4978	14.1199	13.0184	12.8181	13.2001	12.4111	12.5178	12.9519	12.0905	12.564	1	1	13.1309	12.5071	4.65473	2.4774	0.952493	-0.0702189	0.0762006	0.154915
284	P284	LU3453000	C4 H4 O2					84.0214	85.0286	0.987		No MS2	[M+H]+1	3	●	●	●	●	●	2.88	13.1618	14.4314	13.1534	13.9324	14.0629	14.1039	13.1886	13.9512	12.7221	13.438	1	1	13.7484	13.4808	4.14247	4.18372	0.980536	-0.0283579	0.476703	0.63534
285	P285	Unknown_P001	C4 H10 N3 O2 P S					195.023	196.031	0.759		No MS2	[M+H]+1	4	●	●	●	●	●	1.01	0.165967	0.182707	0.204172	0.192461	0.18366	0.20398	0.209315	0.209892	0.208859	0.202189	1	1	0.185793	0.206847	7.5612	1.69761	1.11332	0.154865	0.0116819	0.031295
286	P286	Unknown_P002	C14 H14 N2 O6					306.085	307.092	7.308		DDA for preferred ion	[M+H]+1	4	●	●	●	●	●	-1.13	2.32864	2.54549	2.44079	2.49924	2.47441	2.52153	2.45865	2.53023	2.52497	2.54779	1	1	2.45771	2.51664	3.32139	1.34912	1.02397	0.0341796	0.174487	0.301867
287	P287	Unknown_P003	C6 H15 N O6					197.09	198.097	0.981		No MS2	[M+H]+1	4	●	●	●	●	●	-1.47	1.02456	1.0169	1.01992	1.00754	1.02327	0.901313	0.897342	1.05574	0.899912	1.05682	1	1	1.01844	0.962225	0.66636	8.92431	0.944804	-0.0819132	0.18262	0.31323
288	P288	Unknown_P004	C2 H5 N O7					155.007	156.014	0.676		DDA for preferred ion	[M+H]+1	4	●	●	●	●	●	0.1	0.623332	0.868712	1.02555	0.765165	0.887307	0.0256329	0.0247435	0.0207643	0.0251176	0.0167325	1	1	0.834014	0.0225982	17.9712	16.8401	0.0270957	-5.20579	2.01053e-06	1.19291e-05
289	P289	Unknown_P005	C4 H5 N O					83.0374	84.0447	6.869		DDA for preferred ion	[M+H]+1	4	●	●	●	●	●	3.09	3.01281	3.37384	3.45547	1.66295	3.42231	3.17991	3.11008	3.21486	3.52531	3.3829	1	1	2.98548	3.28261	25.4675	5.1398	1.09953	0.136884	0.418406	0.574338
290	P290	Unknown_P006	C3 H2 Cl O10 P3 S					357.827	358.834	0.747		DDA for preferred ion	[M+H]+1	4	●	●	●	●	●	-0.88	0.467556	0.491997	0.524202	0.614219	0.620179	0.61149	0.594034	0.67141	0.628636	0.657747	1	1	0.543631	0.632663	12.9004	5.05259	1.16377	0.218812	0.0324607	0.0755844
291	P291	Unknown_P007	C9 H14 O8					250.068	251.076	0.948		DDA for preferred ion	[M+H]+1	4	●	●	●	●	●	-1.84	0.770722	0.841031	0.83234	0.871836	0.876261	0.86509	0.807653	0.868429	0.879182	0.895932	1	1	0.838438	0.863257	5.05154	3.86082	1.0296	0.0420864	0.33326	0.486231
292	P292	Unknown_P008	C29 H49 N O14 P2					697.263	698.27	0.865		No MS2	[M+H]+1	4	●	●	●	●	●	-0.46	1.09722	1.19263	1.14227	1.12737	1.10323	1.16895	1.2837	1.18602	1.24865	1.12407	1	1	1.13254	1.20228	3.37331	5.30488	1.06158	0.0862069	0.0692136	0.142887
293	P293	Unknown_P009	C15 H28 N2 O4					300.204	301.212	1.049		DDA for preferred ion	[M+H]+1	4	●	●	●	●	●	-2.05	1.15858	1.19952	1.35508	1.14368	1.36798	1.11867	1.25539	0.753224	1.27062	1.44081	1	1	1.24497	1.16774	8.7108	22.1274	0.937969	-0.0923875	0.554869	0.694453
294	P294	Unknown_P010	C10 H20 N O13 P					393.067	394.074	0.808		No MS2	[M+H]+1	4	●	●	●	●	●	-1.78	0.542482	0.52863	0.524503	0.476971	0.500377	0.630214	0.650064	0.644091	0.580038	0.575054	1	1	0.514593	0.615892	5.04	5.80971	1.19685	0.259247	0.000900952	0.00331038
295	P295	Unknown_P011	C12 H22 N2 O4					258.158	259.165	1.083		DDA for preferred ion	[M+H]+1	4	●	●	●	●	●	-1.7	1.26184	1.55214	1.72024	1.16779	1.58193	1.46063	1.5426	0.487081	1.64687	1.71481	1	1	1.45679	1.3704	15.9398	36.724	0.940697	-0.0881974	0.736432	0.819281
296	P296	Unknown_P012	C5 H2 Cl N4 O P					199.965	200.973	0.675		DDA for preferred ion	[M+H]+1	4	●	●	●	●	●	-0.32	0.699056	0.885905	0.978672	0.828695	0.774041	0.142822	0.127896	0.0318912	0.117914	0.125286	1	1	0.833273	0.109162	12.793	40.4301	0.131004	-2.93232	6.44954e-07	4.16619e-06
297	P297	Unknown_P013	C17 H38 N5 O6 P3					501.205	502.212	0.898		DDA for preferred ion	[M+H]+1	4	●	●	●	●	●	2.57	0.545152	0.5894	0.559569	0.609062	0.539322	0.64229	0.581825	0.632118	0.619969	0.607824	1	1	0.568501	0.616805	5.24637	3.80068	1.08497	0.117652	0.0215717	0.0534858
298	P298	Unknown_P014	C18 H35 N7 O18					637.205	638.212	0.813		No MS2	[M+H]+1	4	●	●	●	●	●	1.62	0.810463	0.86683	0.848078	0.851258	0.799784	0.96057	1.01534	0.892697	0.995571	0.91197	1	1	0.835282	0.955229	3.43369	5.50251	1.1436	0.193583	0.00205769	0.00656657
299	P299	Unknown_P015	C10 H15 N3 O6					273.095	274.103	1.065		DDA for preferred ion	[M+H]+1	4	●	●	●	●	●	-2.18	2.20416	2.10897	2.3838	2.13407	2.49497	1.96978	1.8276	2.12375	2.18061	2.55366	1	1	2.26519	2.13108	7.39326	12.8336	0.940795	-0.0880483	0.377101	0.532727
300	P300	Unknown_P016	C28 H58 N5 O18 P3					845.3	846.307	1.18		DDA for preferred ion	[M+H]+1	4	●	●	●	●	●	0.71	1.37983	1.61228	1.58136	1.59017	1.63312	1.62146	1.56056	1.32256	1.59229	1.56753	1	1	1.55935	1.53288	6.56386	7.82673	0.983026	-0.0246988	0.717193	0.807977
301	P301	Unknown_P017	C13 H13 N O3					231.089	232.097	9.153		DDA for preferred ion	[M+H]+1	4	●	●	●	●	●	-0.97	3.06097	3.46633	3.50122	3.57343	3.65093	3.45553	3.38493	3.58709	3.60517	3.65089	1	1	3.45058	3.53672	6.63776	3.15765	1.02497	0.0355756	0.471351	0.630304
302	P302	Unknown_P018	C11 H19 N5 O2					253.154	254.161	5.044		DDA for preferred ion	[M+H]+1	4	●	●	●	●	●	-1.47	0.931765	1.06769	1.01219	0.994029	0.977101	1.08916	1.00193	1.07705	1.08062	1.07686	1	1	0.996556	1.06512	4.98903	3.34935	1.0688	0.0959986	0.0366241	0.0833522
303	P303	Unknown_P019	C18 H33 N O15					503.184	504.191	0.88		DDA for preferred ion	[M+H]+1	4	●	●	●	●	●	-2.18	2.72301	3.0972	2.72328	2.77836	2.66309	3.27191	3.17679	3.1961	3.35817	3.09137	1	1	2.79699	3.21887	6.1747	3.13617	1.15083	0.202679	0.00151053	0.00502048
304	P304	Unknown_P020	C11 H27 O7 P3					364.098	365.105	0.793		No MS2	[M+H]+1	4	●	●	●	●	●	1.5	0.279473	0.282338	0.282504	0.34542	0.288963	0.315368	0.328512	0.313575	0.279416	0.323857	1	1	0.295739	0.312146	9.46391	6.18027	1.05548	0.0778925	0.311956	0.462735
305	P305	Unknown_P021	C5 H3 N3 O6 S					232.975	233.982	1.498		DDA for preferred ion	[M+H]+1	4	●	●	●	●	●	1.22	0.440177	0.460882	0.451401	0.482779	0.458523	0.814292	0.803729	0.770433	0.792445	0.789818	1	1	0.458752	0.794143	3.41364	2.07069	1.73109	0.791684	7.70791e-10	1.40319e-08
306	P306	Unknown_P022	C12 H27 P S					234.157	235.165	0.87		No MS2	[M+H]+1	4	●	●	●	●	●	1.61	0.428859	0.492651	0.507369	0.400247	0.510474	0.52189	0.57036	0.559937	0.602865	0.539247	1	1	0.46792	0.55886	10.7304	5.53063	1.19435	0.256224	0.00870939	0.0240559
307	P307	Unknown_P023	C4 H12 O P2 S					170.009	171.017	0.785		No MS2	[M+H]+1	4	●	●	●	●	●	4.95	0.687243	0.70153	0.730596	0.679469	0.656174	0.63296	0.637604	0.635648	0.610793	0.622836	1	1	0.691002	0.627968	3.98874	1.77697	0.908779	-0.137999	0.00146377	0.00488535
308	P308	Unknown_P024	C3 H3 Cl N2 O3 S					181.955	182.962	0.677		DDA for preferred ion	[M+H]+1	4	●	●	●	●	●	-3.28	0.324487	0.386591	0.376023	0.397399	0.316866	0.0333856	0.0262494	0.0274398	0.0174378	0.0521731	1	1	0.360273	0.0313371	10.2773	41.3798	0.0869816	-3.52315	6.76606e-08	5.82754e-07
309	P309	Unknown_P025	C9 H11 N O7					245.053	246.06	0.967		DDA for preferred ion	[M+H]+1	4	●	●	●	●	●	-1.83	0.825162	0.962585	0.856787	0.924018	0.943522	0.799806	0.827196	0.84187	0.903288	0.878664	1	1	0.902415	0.850165	6.51517	4.83787	0.9421	-0.0860476	0.142112	0.257376
310	P310	Unknown_P026	C28 H24 N4 O12					608.138	609.145	6.687		DDA for preferred ion	[M+H]+1	4	●	●	●	●	●	-1.7	1.22974	1.41502	1.31101	1.28619	1.24332	1.45158	1.37047	1.45059	1.4045	1.39195	1	1	1.29705	1.41382	5.67164	2.55571	1.09002	0.124358	0.0128874	0.0338453
311	P311	Unknown_P027	C5 H2 N6 O8 P2					335.941	336.948	0.774		No MS2	[M+H]+1	4	●	●	●	●	●	-0.33	0.428442	0.455843	0.514192	0.463636	0.427123	0.494924	0.494487	0.51611	0.474961	0.507017	1	1	0.457847	0.4975	7.7382	3.11496	1.08661	0.11983	0.0510349	0.110484
312	P312	Unknown_P028	C17 H26 N6 O10					474.169	475.176	0.804		No MS2	[M+H]+1	4	●	●	●	●	●	-4.78	1.04413	1.03603	1.05851	1.0112	0.968543	0.876872	0.936785	0.815113	0.870017	0.922097	1	1	1.02368	0.884177	3.44666	5.43266	0.863722	-0.211361	0.000789077	0.00292616
313	P313	Unknown_P029	C3 H N7 O					151.024	152.032	1.968		DDA for preferred ion	[M+H]+1	4	●	●	●	●	●	0.62	0.769231	0.810994	0.858676	0.883292	0.868953	1.71211	1.63188	1.67591	1.68458	1.74449	1	1	0.838229	1.6898	5.6258	2.48696	2.01591	1.01143	1.59116e-09	2.12419e-08
314	P314	Unknown_P030	C38 H42 O14					722.258	723.265	1.009		No MS2	[M+H]+1	4	●	●	●	●	●	0.55	0.246208	0.255808	0.29249	0.288923	0.298356	0.215241	0.290165	0.245308	0.255332	0.312063	1	1	0.276357	0.263622	8.5503	14.4395	0.953918	-0.0680633	0.542791	0.687936
315	P315	Unknown_P031	C21 H31 N2 O7 P S					486.157	487.165	0.836		No MS2	[M+H]+1	4	●	●	●	●	●	-3.4	2.27331	2.4534	2.46717	2.45271	2.313	1.92852	1.94721	1.85963	2.03407	2.00124	1	1	2.39192	1.95413	3.82243	3.45596	0.816974	-0.291638	2.55888e-05	0.000127308
316	P316	Unknown_P032	C28 H56 N5 O17 P3					827.289	828.296	0.851		DDA for preferred ion	[M+H]+1	4	●	●	●	●	●	0.57	0.762868	0.927009	0.990109	0.928829	0.941344	0.974581	1.06046	0.964665	1.09867	1.07457	1	1	0.910032	1.03459	9.46736	5.89231	1.13687	0.185071	0.0297611	0.0709484
317	P317	Unknown_P033	C11 H24 N6 O11					416.152	417.159	0.918		DDA for preferred ion	[M+H]+1	4	●	●	●	●	●	4.02	0.400941	0.418495	0.442204	0.431515	0.497187	0.437661	0.380095	0.45002	0.481094	0.428265	1	1	0.438068	0.435427	8.32233	8.45094	0.99397	-0.00872549	0.912027	0.932993
318	P318	Unknown_P034	C20 H43 N O4					361.318	362.326	12.42		DDA for preferred ion	[M+H]+1	4	●	●	●	●	●	-2.35	1.17159	0.939048	1.05463	1.05536	1.27149	1.17384	1.10766	0.988207	1.07026	1.15777	1	1	1.09842	1.09954	11.5588	6.77977	1.00102	0.00147145	0.986835	0.986835
319	P319	Unknown_P035	C10 H2 Cl N O9					314.942	315.949	0.754		DDA for preferred ion	[M+H]+1	4	●	●	●	●	●	0.88	0.55125	0.613363	0.630483	0.609792	0.613928	0.682172	0.717194	0.748662	0.742338	0.767808	1	1	0.603763	0.731635	5.03973	4.51671	1.21179	0.277141	0.000217055	0.000896192
320	P320	Unknown_P036	C5 H2 Cl O14 P3 S4					541.723	542.73	0.748		DDA for preferred ion	[M+H]+1	4	●	●	●	●	●	0.37	0.756403	0.824876	0.846141	0.692813	0.76072	1.01241	0.996821	1.09378	1.0264	1.07953	1	1	0.776191	1.04179	7.84884	4.08639	1.34218	0.42458	4.40318e-05	0.000212467
321	P321	Unknown_P037	C3 H5 Cl O11 P2 S4					441.788	442.795	0.747		No MS2	[M+H]+1	4	●	●	●	●	●	0.22	0.37371	0.411137	0.41329	0.449092	0.460632	0.503306	0.486981	0.54801	0.513821	0.527735	1	1	0.421572	0.515971	8.17531	4.51449	1.22392	0.291509	0.000959893	0.00347907
322	P322	Unknown_P038	C21 H41 N O18					595.231	596.238	0.91		DDA for preferred ion	[M+H]+1	4	●	●	●	●	●	-2.14	0.501059	0.542847	0.565611	0.614692	0.615595	0.537036	0.518555	0.565477	0.635283	0.561546	1	1	0.567961	0.563579	8.60978	7.87591	0.992286	-0.0111719	0.885744	0.919017
323	P323	Unknown_P039	C18 H22 N2 O4					330.157	331.165	5.153		DDA for preferred ion	[M+H]+1	4	●	●	●	●	●	-2.01	3.62297	4.08872	4.07139	4.01116	4.05234	3.91367	3.75704	4.03381	3.94936	4.0032	1	1	3.96932	3.93142	4.93164	2.74787	0.990452	-0.013841	0.714528	0.807977
324	P324	Unknown_P040	C7 H11 N O7					221.053	222.061	1.829		DDA for preferred ion	[M+H]+1	4	●	●	●	●	●	-0.96	4.2082	2.69203	3.57212	3.41518	3.24531	3.01924	2.81878	2.72833	2.64008	2.59553	1	1	3.42657	2.76039	16.0156	6.0914	0.805584	-0.311893	0.031849	0.0743761
325	P325	Unknown_P041	C16 H30 N2 O4					314.22	315.227	1.214		DDA for preferred ion	[M+H]+1	4	●	●	●	●	●	-1.81	1.83053	2.56771	1.8809	1.53877	1.46794	2.24005	2.25435	2.12146	2.12688	2.06471	1	1	1.85717	2.16149	23.4555	3.79821	1.16386	0.218921	0.163303	0.28498
326	P326	Unknown_P042	C17 H28 N7 O5 P					441.189	442.197	8.767		DDA for preferred ion	[M+H]+1	4	●	●	●	●	●	0.66	0.946919	2.87467	1.20529	3.38318	3.4214	2.37644	1.4209	2.46905	2.54714	2.5651	1	1	2.36629	2.27572	50.7488	21.2524	0.961725	-0.056303	0.879567	0.914193
327	P327	Unknown_P043	C17 H23 N4 O4 P3					440.092	441.1	0.81		No MS2	[M+H]+1	4	●	●	●	●	●	-2.16	0.826378	0.829171	0.808051	0.858207	0.786032	0.924065	0.951	0.769794	0.753035	0.814169	1	1	0.821568	0.842412	3.25974	10.703	1.02537	0.0361469	0.633537	0.754031
328	P328	Unknown_P044	C7 H10 N2 O2 P2 S					247.993	249	0.824		No MS2	[M+H]+1	4	●	●	●	●	●	-3.36	0.776763	0.821237	0.875371	0.76323	0.729712	0.674722	0.684578	0.637787	0.63793	0.727267	1	1	0.793263	0.672457	7.11364	5.5394	0.84771	-0.238357	0.00397702	0.0121587
329	P329	Unknown_P045	C8 H9 N					119.073	120.081	6.87		DDA for preferred ion	[M+H]+1	4	●	●	●	●	●	-1.44	6.22017	7.18396	7.06532	7.19423	7.3308	6.60284	6.5934	6.95374	7.10713	7.15176	1	1	6.9989	6.88177	6.36334	3.91142	0.983266	-0.0243468	0.62834	0.750349
330	P330	Unknown_P046	C7 H5 N7					187.061	188.068	5.157		DDA for preferred ion	[M+H]+1	4	●	●	●	●	●	-0.29	1.09665	1.09371	0.396778	1.1225	1.0472	1.18588	1.23783	1.28022	1.2561	1.17118	1	1	0.951369	1.22624	32.7119	3.78137	1.28892	0.366166	0.0865355	0.172855
331	P331	Unknown_P047	C15 H31 N O13					433.179	434.186	0.92		DDA for preferred ion	[M+H]+1	4	●	●	●	●	●	-2.01	0.971023	0.992292	0.973969	1.08555	1.0147	1.00408	0.884806	1.02517	1.09059	1.0153	1	1	1.0075	1.00399	4.66314	7.43366	0.99651	-0.00504372	0.931152	0.947717
332	P332	Unknown_P048	C18 H30 O15					486.157	487.165	1.168		DDA for preferred ion	[M+H]+1	4	●	●	●	●	●	-2.13	0.768893	1.0141	0.843378	0.853221	0.909791	0.958817	0.801388	0.770536	0.878438	0.913444	1	1	0.877876	0.864525	10.3856	9.01521	0.984791	-0.0221102	0.809708	0.86708
333	P333	Unknown_P049	C6 H13 N O8					227.064	228.071	0.839		DDA for preferred ion	[M+H]+1	4	●	●	●	●	●	-1.83	2.00131	2.02859	1.90037	1.98503	1.70136	1.57581	1.60218	1.69617	1.56664	1.55466	1	1	1.92333	1.59909	6.91554	3.56533	0.831419	-0.266353	0.00103972	0.00370139
334	P334	Unknown_P050	C13 H21 N3 O8					347.132	348.14	1.858		DDA for preferred ion	[M+H]+1	4	●	●	●	●	●	-1.7	2.04291	2.31185	2.02636	2.09404	1.99394	1.37375	1.18713	1.28411	1.23536	1.37057	1	1	2.09382	1.29018	6.07198	6.3805	0.616185	-0.698564	2.33764e-06	1.3768e-05
335	P335	Unknown_P051	C9 H3 Cl N O13 P					398.903	399.911	0.753		No MS2	[M+H]+1	4	●	●	●	●	●	0.51	0.26705	0.27973	0.282988	0.262286	0.283396	0.316946	0.342632	0.360625	0.351119	0.357167	1	1	0.27509	0.345698	3.54996	5.05151	1.25667	0.329606	4.81948e-05	0.000229786
336	P336	Unknown_P052	C10 H18 N3 O7 P					323.088	324.095	0.785		No MS2	[M+H]+1	4	●	●	●	●	●	-1.61	0.304283	0.31293	0.326726	0.298173	0.261624	0.343102	0.359297	0.35683	0.368184	0.322543	1	1	0.300747	0.349991	8.09893	5.08148	1.16374	0.218767	0.00648447	0.0186167
337	P337	Unknown_P053	C21 H34 N3 O5 P S					471.194	472.202	1.084		DDA for preferred ion	[M+H]+1	4	●	●	●	●	●	-2.99	2.80526	2.92048	3.12905	2.8341	2.89638	2.73255	2.71327	2.74931	2.79808	2.91762	1	1	2.91706	2.78217	4.36198	2.94691	0.953759	-0.0683038	0.0814418	0.16432
338	P338	Unknown_P054	C36 H47 N2 O17 P					810.262	811.27	0.985		No MS2	[M+H]+1	4	●	●	●	●	●	1.28	0.351808	0.438662	0.470969	0.405404	0.420046	0.333408	0.381637	0.409618	0.413871	0.381387	1	1	0.417378	0.383984	10.5631	8.35857	0.919992	-0.120307	0.208121	0.348755
339	P339	Unknown_P055	C10 H15 N3 O6					273.096	274.103	1.695		DDA for preferred ion	[M+H]+1	4	●	●	●	●	●	-1.6	6.32036	7.02337	7.85035	6.77944	6.71872	5.87096	5.78026	5.97639	5.69738	6.39207	1	1	6.93845	5.94341	8.19855	4.56754	0.856591	-0.223321	0.00773232	0.0219631
340	P340	Unknown_P056	C9 H14 N2 O4					214.095	215.102	1.711		DDA for preferred ion	[M+H]+1	4	●	●	●	●	●	-0.7	13.7219	15.3691	15.2616	14.6719	14.5622	7.77871	7.80617	9.92216	7.75129	12.9524	1	1	14.7173	9.24215	4.47893	24.5871	0.627978	-0.671215	0.000848581	0.00313232
341	P341	Unknown_P057	C9 H6 Cl N6 P					264.008	265.015	0.675		DDA for preferred ion	[M+H]+1	4	●	●	●	●	●	-0.78	1.83723	1.97375	2.16148	2.01396	1.85577	0.0108922	0.0114044	0.0108213	0.00888877	0.0141632	1	1	1.96844	0.011234	6.68549	16.8875	0.00570706	-7.45304	7.30093e-10	1.36001e-08
342	P342	Unknown_P058	C30 H50 O15 P2					712.262	713.27	0.895		DDA for preferred ion	[M+H]+1	4	●	●	●	●	●	-0.22	0.865747	0.975915	0.907923	0.966229	0.833985	0.989622	0.900627	1.18311	1.14593	0.913842	1	1	0.90996	1.02663	6.78491	12.7642	1.12821	0.174037	0.109399	0.206185
343	P343	Unknown_P059	C15 H29 N O14					447.158	448.165	0.8		No MS2	[M+H]+1	4	●	●	●	●	●	-1.99	0.325795	0.342572	0.343808	0.338138	0.304431	0.317269	0.322135	0.316339	0.356484	0.329096	1	1	0.330949	0.328264	4.96931	5.04655	0.991889	-0.0117495	0.803563	0.865658
344	P344	Unknown_P060	C16 H25 N5 O9					431.163	432.17	0.806		DDA for preferred ion	[M+H]+1	4	●	●	●	●	●	-5	1.41725	1.4956	1.50367	1.54487	1.41167	1.74238	1.71246	1.54681	1.6442	1.616	1	1	1.47461	1.65237	3.93569	4.71152	1.12055	0.164201	0.0034695	0.01073
345	P345	Unknown_P061	C3 H8 N2 O6					168.038	169.046	0.674		DDA for preferred ion	[M+H]+1	4	●	●	●	●	●	0.32	1.98114	2.26397	2.4123	2.31056	2.28528	0.0924261	0.093542	0.0964726	0.104268	0.0993942	1	1	2.25065	0.0972206	7.15529	4.91869	0.0431967	-4.53294	1.70358e-09	2.237e-08
346	P346	Unknown_P062	C9 H14 N2 O4					214.095	215.102	0.787		No MS2	[M+H]+1	4	●	●	●	●	●	-1.05	0.441539	0.448956	0.410404	0.446025	0.396453	0.465855	0.417113	0.420233	0.475765	0.405622	1	1	0.428675	0.436917	5.53251	7.23458	1.01923	0.0274754	0.653381	0.765143
347	P347	Unknown_P063	C6 H7 N2 O10 P					297.985	298.992	0.788		No MS2	[M+H]+1	4	●	●	●	●	●	4.16	1.51205	1.39576	1.51047	1.47428	1.2957	1.64795	1.64966	1.58851	1.43305	1.44486	1	1	1.43765	1.55281	6.42081	6.88367	1.0801	0.111162	0.105739	0.204002
348	P348	Unknown_P064	C16 H29 N O16					491.148	492.155	0.945		DDA for preferred ion	[M+H]+1	4	●	●	●	●	●	-1.9	0.283436	0.332802	0.352831	0.34496	0.324257	0.306088	0.289516	0.304943	0.348902	0.327057	1	1	0.327657	0.315301	8.25538	7.30891	0.96229	-0.0554566	0.459231	0.62031
349	P349	Unknown_P065	C8 H15 N3					153.126	154.134	0.787		No MS2	[M+H]+1	4	●	●	●	●	●	-1.01	0.250933	0.287922	0.257908	0.281048	0.251118	0.319324	0.320479	0.321146	0.243711	0.280901	1	1	0.265786	0.297112	6.5728	11.5757	1.11786	0.160744	0.106926	0.20539
350	P350	Unknown_P066	C9 H20 N O11 P					349.077	350.084	0.801		No MS2	[M+H]+1	4	●	●	●	●	●	-2.26	0.312845	0.3095	0.320689	0.331216	0.292578	0.383247	0.344429	0.350419	0.339262	0.333372	1	1	0.313365	0.350146	4.56793	5.58239	1.11737	0.16011	0.00943474	0.0258809
351	P351	Unknown_P067	C4 H9 Cl2 O2 P					189.972	190.979	0.681		DDA for preferred ion	[M+H]+1	4	●	●	●	●	●	0.76	0.225506	0.324594	0.262683	0.236758	0.252933	0.500804	0.364935	0.349922	0.349475	0.387742	1	1	0.260495	0.390576	14.8161	16.2726	1.49936	0.584347	0.00446991	0.0133597
352	P352	Unknown_P068	C3 H7 Cl N2 O5 S					217.976	218.983	0.673		DDA for preferred ion	[M+H]+1	4	●	●	●	●	●	-2.05	0.811127	1.11821	1.45398	0.876212	1.19834	0.00944206	0.00979414	0.00961839	0.00966217	0.0114639	1	1	1.09157	0.00999614	23.734	8.30457	0.00915756	-6.77082	1.41537e-05	7.45864e-05
353	P353	Unknown_P069	C7 H17 O10 P					292.055	293.063	0.864		DDA for preferred ion	[M+H]+1	4	●	●	●	●	●	-2.34	1.95651	2.02464	2.20925	2.05086	2.11766	2.27105	2.27708	2.21222	2.345	2.2814	1	1	2.07178	2.27735	4.63914	2.0683	1.09922	0.136482	0.00263531	0.00827796
354	P354	Unknown_P070	C11 H23 O13 P					394.087	395.094	0.891		No MS2	[M+H]+1	4	●	●	●	●	●	-1.56	0.307831	0.350985	0.316455	0.271037	0.263899	0.332115	0.349621	0.338395	0.341702	0.32026	1	1	0.302041	0.336419	11.7672	3.27565	1.11382	0.155512	0.072704	0.148561
355	P355	Unknown_P071	C14 H31 N6 O18 P					602.145	603.152	0.81		No MS2	[M+H]+1	4	●	●	●	●	●	2.43	0.284004	0.277179	0.305139	0.297759	0.271684	0.336509	0.349948	0.264915	0.273189	0.310421	1	1	0.287153	0.306996	4.87742	12.2329	1.0691	0.0964021	0.300452	0.450678
356	P356	Unknown_P072	C H3 Cl N2 O4 P2 S					235.897	236.905	0.726		DDA for preferred ion	[M+H]+1	4	●	●	●	●	●	-1.97	0.223997	0.274294	0.254975	0.234944	0.23363	0.013073	0.0124236	0.0101732	0.0145466	0.0137433	1	1	0.244368	0.0127919	8.25356	12.9971	0.0523471	-4.25575	5.83508e-09	6.4026e-08
357	P357	Unknown_P073	C4 H6 N5 O P3					232.979	233.986	0.754		No MS2	[M+H]+1	4	●	●	●	●	●	2.24	0.237326	0.247987	0.282276	0.251189	0.265313	0.274003	0.273322	0.30798	0.300486	0.307058	1	1	0.256818	0.29257	6.77211	5.98211	1.13921	0.188033	0.0118779	0.0316365
358	P358	Unknown_P074	C4 H12 N O2 P3 S					230.981	231.988	0.755		DDA for preferred ion	[M+H]+1	4	●	●	●	●	●	3.39	1.76529	1.88942	1.96112	1.88953	1.88205	2.0967	2.09395	2.18982	2.12826	2.23429	1	1	1.87748	2.1486	3.75605	2.86289	1.14441	0.1946	0.000192404	0.000806887
359	P359	Unknown_P075	C6 H15 O10 P					278.04	279.047	0.808		DDA for preferred ion	[M+H]+1	4	●	●	●	●	●	-1.9	2.03677	1.95538	2.12175	2.21645	2.13617	2.22798	2.10076	2.03026	1.99657	2.08563	1	1	2.0933	2.08824	4.779	4.24665	0.99758	-0.00349572	0.934554	0.949153
360	P360	Unknown_P076	C8 H8 N8 O4					280.067	281.074	1.961		DDA for preferred ion	[M+H]+1	4	●	●	●	●	●	-0.48	0.430802	0.44686	0.495756	0.559036	0.538547	1.1469	1.04959	1.13137	1.17493	1.20088	1	1	0.4942	1.14073	11.2812	5.03971	2.30824	1.20679	9.09978e-08	7.59263e-07
361	P361	Unknown_P077	C5 H6 Cl N3 O3 S					222.981	223.989	0.676		DDA for preferred ion	[M+H]+1	4	●	●	●	●	●	-2.35	2.05864	2.40887	2.52081	2.31381	2.106	0.265037	0.232294	0.221837	0.223588	0.226526	1	1	2.28163	0.233856	8.62777	7.6442	0.102496	-3.28637	1.28045e-08	1.26623e-07
362	P362	Unknown_P078	C8 H N5 O3					215.007	216.014	0.753		No MS2	[M+H]+1	4	●	●	●	●	●	-4	0.260716	0.299905	0.29112	0.389518	0.356981	0.321825	0.327544	0.344828	0.337662	0.340278	1	1	0.319648	0.334427	16.37	2.83302	1.04624	0.0652085	0.551591	0.693602
363	P363	Unknown_P079	C10 H24 N2 O3					220.178	221.186	0.857		No MS2	[M+H]+1	4	●	●	●	●	●	-1.4	0.188932	0.210105	0.219902	0.177335	0.190714	0.307369	0.333018	0.282278	0.323251	0.290873	1	1	0.197398	0.307358	8.72603	6.92428	1.55705	0.638814	1.88308e-05	9.54649e-05
364	P364	Unknown_P080	C5 H2 O3					110.001	111.008	1.778		DDA for preferred ion	[M+H]+1	4	●	●	●	●	●	0.93	11.037	11.9257	11.7861	11.0156	11.0354	0.0972644	0.00669488	0.0992448	0.0116766	0.00937736	1	1	11.36	0.0448516	4.00961	108.774	0.00394822	-7.98458	1.28122e-11	4.10501e-10
365	P365	Unknown_P081	C14 H19 O9 P S					394.051	395.058	0.798		No MS2	[M+H]+1	4	●	●	●	●	●	4.77	0.237167	0.281561	0.232647	0.222657	0.210719	0.289159	0.284846	0.265223	0.262558	0.254003	1	1	0.23695	0.271158	11.3655	5.57734	1.14437	0.194548	0.0383203	0.0863699
366	P366	Unknown_P082	C10 H21 N4 O P3					306.094	307.101	0.987		No MS2	[M+H]+1	4	●	●	●	●	●	4.41	0.488269	0.507173	0.519367	0.456245	0.556883	0.505386	0.611013	0.48607	0.499581	0.512283	1	1	0.505587	0.522866	7.37302	9.60254	1.03418	0.0484819	0.553845	0.694453
367	P367	Unknown_P083	C18 H25 N3 O6					379.174	380.181	6.346		DDA for preferred ion	[M+H]+1	4	●	●	●	●	●	-1.47	0.667407	0.757624	0.759659	0.783775	0.776689	0.697332	0.685234	0.681778	0.693401	0.706605	1	1	0.749031	0.69287	6.26958	1.42545	0.925022	-0.11244	0.0308002	0.0732075
368	P368	Unknown_P084	C18 H33 N O9					407.215	408.222	7.738		DDA for preferred ion	[M+H]+1	4	●	●	●	●	●	-1.84	0.997865	1.10614	1.11283	1.06666	1.02517	0.00571281	0.00678126	0.006513	0.0092683	0.00530445	1	1	1.06173	0.00671596	4.71485	23.0175	0.00632547	-7.30461	4.56198e-11	1.21805e-09
369	P369	Unknown_P085	C26 H37 N5 O6					515.272	516.279	11.711		DDA for preferred ion	[M+H]+1	4	●	●	●	●	●	-4.47	0.90292	1.00825	1.02365	0.554161	0.999578	0.894478	0.979215	1.00239	0.965662	1.05329	1	1	0.89771	0.979008	22.0344	5.90955	1.09056	0.125071	0.403465	0.558161
370	P370	Unknown_P086	C8 H13 O P3					218.019	219.026	0.788		DDA for preferred ion	[M+H]+1	4	●	●	●	●	●	4.81	2.61723	2.87676	2.97867	2.76187	2.70326	2.76146	2.74216	2.71626	2.67894	2.65947	1	1	2.78756	2.71166	5.11302	1.56732	0.972771	-0.0398273	0.286821	0.433479
371	P371	Unknown_P087	C9 H19 N O8					269.111	270.118	1.48		DDA for preferred ion	[M+H]+1	4	●	●	●	●	●	-1.8	0.0816841	0.0756143	0.0716784	0.0632702	0.0610357	0.54524	0.56648	0.510236	0.51101	0.579945	1	1	0.0706565	0.542582	12.1409	5.84077	7.67915	2.94095	9.56336e-10	1.59589e-08
372	P372	Unknown_P088	C28 H47 N O14 P2					683.247	684.254	0.983		DDA for preferred ion	[M+H]+1	4	●	●	●	●	●	-0.51	3.85492	4.41382	4.20288	4.03221	4.26382	3.27617	4.19288	3.73975	4.23836	3.81768	1	1	4.15353	3.85297	5.19496	10.1423	0.927636	-0.10837	0.170588	0.29576
373	P373	Unknown_P089	C16 H29 N O15					475.153	476.16	0.811		DDA for preferred ion	[M+H]+1	4	●	●	●	●	●	-1.73	2.67404	2.92944	2.80494	2.7585	2.5383	2.98211	3.0478	2.80358	2.9274	3.02008	1	1	2.74104	2.9562	5.33302	3.26507	1.07849	0.109016	0.0251985	0.0607951
374	P374	Unknown_P090	C4 H13 N4 O4 P					212.067	213.075	0.767		DDA for preferred ion	[M+H]+1	4	●	●	●	●	●	-0.61	1.21646	1.33666	1.43794	1.28016	1.32391	1.37934	1.38606	1.47686	1.38931	1.57982	1	1	1.31903	1.44228	6.1715	6.00872	1.09344	0.128878	0.0490744	0.107401
375	P375	Unknown_P091	C3 H8 N9 P					201.063	202.071	1.018		No MS2	[M+H]+1	4	●	●	●	●	●	-2.73	0.502373	0.618981	0.568561	0.575472	0.667527	0.494588	0.579207	0.291331	0.626069	0.634746	1	1	0.586583	0.525188	10.4886	27.0492	0.895335	-0.1595	0.401068	0.55786
376	P376	Unknown_P092	C12 H22 N2 O4					258.158	259.165	1.418		DDA for preferred ion	[M+H]+1	4	●	●	●	●	●	-1.37	1.33029	1.3221	1.41861	1.30221	1.22993	1.50198	1.24456	1.1287	1.39365	1.54121	1	1	1.32063	1.36202	5.11626	12.7662	1.03134	0.0445208	0.633149	0.754031
377	P377	Unknown_P093	C28 H47 N O14 P2					683.247	684.254	1.164		DDA for preferred ion	[M+H]+1	4	●	●	●	●	●	-0.42	2.64566	3.16543	2.81283	2.91757	2.87343	3.06501	2.63672	3.04153	2.71214	2.82852	1	1	2.88298	2.85678	6.54247	6.72498	0.990912	-0.0131712	0.833184	0.883948
378	P378	Unknown_P094	C21 H39 N O18					593.216	594.223	0.809		No MS2	[M+H]+1	4	●	●	●	●	●	-2.01	0.394394	0.43761	0.460108	0.446542	0.408831	0.537111	0.529435	0.496996	0.535004	0.577322	1	1	0.429497	0.535174	6.32588	5.3431	1.24605	0.317359	0.000326748	0.00128297
379	P379	Unknown_P095	C12 H23 N O12					373.122	374.129	0.894		No MS2	[M+H]+1	4	●	●	●	●	●	-0.44	0.323402	0.333436	0.330892	0.354815	0.33589	0.33361	0.341917	0.33521	0.37012	0.323948	1	1	0.335687	0.340961	3.47688	5.13823	1.01571	0.0224909	0.590663	0.723426
380	P380	Unknown_P096	C5 H15 N4 O6 P					258.073	259.081	0.986		No MS2	[M+H]+1	4	●	●	●	●	●	2.14	0.235393	0.252624	0.222122	0.258811	0.271982	0.234269	0.220801	0.230963	0.230372	0.224161	1	1	0.248186	0.228113	7.91076	2.40308	0.91912	-0.121675	0.0588143	0.123713
381	P381	Unknown_P097	C15 H24 N3 O4 P S					373.121	374.128	0.821		No MS2	[M+H]+1	4	●	●	●	●	●	-3.69	0.197028	0.170566	0.189924	0.163687	0.156485	0.232364	0.183182	0.212126	0.222931	0.218958	1	1	0.175538	0.213912	9.85477	8.72966	1.21861	0.285235	0.00977218	0.0265339
382	P382	Unknown_P098	C H3 N O5					109.001	110.009	0.675		DDA for preferred ion	[M+H]+1	4	●	●	●	●	●	2.92	55.5023	64.5166	65.9932	62.2973	58.5915	1.31199	1.21797	1.27739	1.25402	1.32191	1	1	61.3802	1.27666	7.02087	3.33539	0.0207992	-5.58733	1.21576e-09	1.87274e-08
383	P383	Unknown_P099	C12 H21 N3 O7					319.137	320.145	1.827		DDA for preferred ion	[M+H]+1	4	●	●	●	●	●	-1.65	0.883752	0.973853	0.909508	0.881229	0.879049	0.55059	0.54672	0.546634	0.583203	0.585142	1	1	0.905478	0.562458	4.43472	3.53787	0.621172	-0.686935	1.3806e-07	1.09491e-06
384	P384	Unknown_P100	C16 H30 N2 O4					314.22	315.227	1.061		DDA for preferred ion	[M+H]+1	4	●	●	●	●	●	-1.84	4.66731	4.32978	5.51725	4.4958	5.46719	4.84338	4.96346	4.83405	5.34222	5.94698	1	1	4.89546	5.18602	11.3975	9.11741	1.05935	0.0831815	0.400278	0.55786
385	P385	Unknown_P101	C5 H4 O					80.0265	81.0338	0.992		No MS2	[M+H]+1	4	●	●	●	●	●	3.41	0.607099	0.484831	0.321082	0.408167	0.367785	0.59685	0.488039	0.47624	0.437476	0.355908	1	1	0.437793	0.470903	25.6086	18.5513	1.07563	0.10518	0.616543	0.743944
386	P386	Unknown_P102	C28 H45 N O13 P2					665.236	666.244	0.852		DDA for preferred ion	[M+H]+1	4	●	●	●	●	●	-0.32	2.56559	2.86522	3.19361	2.89594	2.96146	3.20878	3.43214	3.11765	3.48546	3.3619	1	1	2.89636	3.32119	7.77752	4.64062	1.14667	0.197455	0.00831585	0.023209
387	P387	Unknown_P103	C12 H16 N4 O5 S2					360.055	361.062	1.799		DDA for preferred ion	[M+H]+1	4	●	●	●	●	●	-4.31	0.394882	0.561781	0.627478	0.658829	0.633071	0.00875534	0.00956836	0.0113722	0.00984798	0.0079413	1	1	0.575208	0.00949704	18.5968	13.5408	0.0165106	-5.92046	2.39833e-06	1.40223e-05
388	P388	Unknown_P104	C2 H Cl N4 O17 P2 S5					609.71	610.718	0.746		No MS2	[M+H]+1	4	●	●	●	●	●	0.05	0.131868	0.152754	0.144829	0.149141	0.162224	0.195263	0.17683	0.203833	0.196213	0.20521	1	1	0.148163	0.19547	7.5186	5.79266	1.31929	0.399759	0.000159222	0.000693137
389	P389	Unknown_P105	C5 H3 Cl2 O17 P3 S4					625.684	626.692	0.748		No MS2	[M+H]+1	4	●	●	●	●	●	-0.04	0.165292	0.174165	0.182634	0.153162	0.167826	0.220417	0.233528	0.228984	0.246495	0.254663	1	1	0.168616	0.236817	6.48162	5.79475	1.40448	0.490032	2.39008e-05	0.000119653
390	P390	Unknown_P106	C7 H12 N2 O2					156.09	157.097	1.046		DDA for preferred ion	[M+H]+1	4	●	●	●	●	●	-0.89	7.18152	7.85038	7.28293	6.9055	7.51233	7.85763	7.33634	7.4327	7.62255	7.88854	1	1	7.34653	7.62755	4.84673	3.23703	1.03825	0.0541573	0.185038	0.316025
391	P391	Unknown_P107	C3 H2 N3 P					110.999	112.006	0.675		No MS2	[M+H]+1	4	●	●	●	●	●	3.22	7.9825	9.20472	9.22608	8.85555	8.25182	0.183625	0.17018	0.179433	0.173692	0.177229	1	1	8.70413	0.176832	6.47687	2.92731	0.0203158	-5.62125	6.37999e-10	1.24643e-08
392	P392	Unknown_P108	C30 H46 N3 O3 P3 S					621.247	622.254	0.855		No MS2	[M+H]+1	4	●	●	●	●	●	-0.66	0.141563	0.165136	0.189922	0.153788	0.143276	0.195297	0.197366	0.175548	0.187414	0.18124	1	1	0.158737	0.187373	12.4885	4.92097	1.1804	0.239274	0.0190348	0.0479462
393	P393	Unknown_P109	C2 H4 N3 P					101.015	102.022	0.675		DDA for preferred ion	[M+H]+1	4	●	●	●	●	●	4.8	0.803181	1.02707	1.47051	0.917217	1.3758	0.0525216	0.040007	0.0432938	0.0485929	0.0526223	1	1	1.11876	0.0474075	25.9991	11.8596	0.0423752	-4.56063	3.54462e-05	0.000174186
394	P394	Unknown_P110	C18 H30 O15					486.157	487.165	0.987		DDA for preferred ion	[M+H]+1	4	●	●	●	●	●	-2.36	5.28847	6.53948	5.82705	5.43869	5.79675	5.07563	5.50989	5.2662	5.29187	5.45701	1	1	5.77809	5.32012	8.37809	3.23159	0.92074	-0.119134	0.0813401	0.16432
395	P395	Unknown_P111	C5 H14 N O4 P					183.066	184.073	0.81		DDA for preferred ion	[M+H]+1	4	●	●	●	●	●	-1.28	7.09853	7.14727	7.36352	7.49523	7.07926	7.17746	7.28115	7.06069	7.37175	7.05198	1	1	7.23676	7.18861	2.5367	1.93333	0.993345	-0.00963258	0.652489	0.765143
396	P396	Unknown_P112	C27 H55 N7 O14 P2 S					795.299	796.307	1.099		DDA for preferred ion	[M+H]+1	4	●	●	●	●	●	-1.34	0.584012	0.626719	0.472247	0.260431	0.418912	0.388263	0.61803	0.626054	0.577469	0.562052	1	1	0.472464	0.554374	30.6835	17.4365	1.17337	0.230653	0.323897	0.475167
397	P397	Unknown_P113	C5 H4 O					80.0265	81.0338	0.881		DDA for preferred ion	[M+H]+1	4	●	●	●	●	●	3.8	8.86333	9.90373	9.99546	10.0173	9.73558	9.65352	9.65012	10.01	10.377	9.95146	1	1	9.70307	9.92843	4.97127	3.02773	1.02323	0.0331241	0.401158	0.55786
398	P398	Unknown_P114	C14 H31 N7 O12					489.205	490.212	0.893		No MS2	[M+H]+1	4	●	●	●	●	●	3.63	0.268442	0.329363	0.285217	0.275069	0.255364	0.319519	0.290445	0.322195	0.354391	0.305302	1	1	0.282691	0.31837	9.99378	7.47278	1.12621	0.17148	0.0627818	0.130959
399	P399	Unknown_P115	C2 H7 N O8					173.017	174.024	0.672		No MS2	[M+H]+1	4	●	●	●	●	●	0.21	0.170952	0.237068	0.273855	0.225883	0.233294	0.0122433	0.0110464	0.0127931	0.0106912	0.012337	1	1	0.22821	0.0118222	16.2067	7.64313	0.051804	-4.27079	1.10983e-06	6.89126e-06
400	P400	Unknown_P116	C4 H3 N9					177.051	178.059	0.756		No MS2	[M+H]+1	4	●	●	●	●	●	0.44	0.215526	0.233759	0.250093	0.308091	0.283402	0.257783	0.250027	0.267662	0.258524	0.250083	1	1	0.258174	0.256816	14.5038	2.8408	0.994738	-0.00761102	0.938493	0.949958
401	P401	Unknown_P117	C9 H12 N2 O3 S					228.057	229.064	6.165		DDA for preferred ion	[M+H]+1	4	●	●	●	●	●	-0.1	0.753079	0.896879	0.882639	0.833798	0.810541	0.868675	0.827199	0.864022	0.841578	0.890804	1	1	0.835387	0.858456	6.93061	2.87922	1.02761	0.0392988	0.436291	0.595347
402	P402	Unknown_P118	C2 H8 N2 O2 S					124.031	125.038	0.673		No MS2	[M+H]+1	4	●	●	●	●	●	-0.81	0.109079	0.142475	0.259487	0.128064	0.239922	0.00968722	0.00424096	0.00518024	0.00498791	0.00644719	1	1	0.175805	0.0061087	39.1574	35.231	0.034747	-4.84697	0.000567457	0.00214403
403	P403	Unknown_P119	C7 H17 N O6					211.105	212.113	0.872		DDA for preferred ion	[M+H]+1	4	●	●	●	●	●	-1.65	5.5272	5.64182	5.46079	5.65595	5.21476	6.24752	6.03485	6.44494	6.09344	6.18007	1	1	5.5001	6.20016	3.25333	2.56643	1.12728	0.172847	0.00018087	0.000770623
404	P404	Unknown_P120	C8 H6					102.047	103.054	5.144		DDA for preferred ion	[M+H]+1	4	●	●	●	●	●	1.22	13.1616	14.665	14.5232	14.8495	15.1559	13.9907	13.4313	14.3191	14.2102	14.6907	1	1	14.471	14.1284	5.31606	3.28982	0.976321	-0.034572	0.418743	0.574338
405	P405	Unknown_P121	C5 H7 N4 O P					170.036	171.043	0.674		No MS2	[M+H]+1	4	●	●	●	●	●	0.43	0.26258	0.304556	0.317791	0.313828	0.329296	0.0134668	0.0129445	0.0132375	0.0139832	0.0114874	1	1	0.30561	0.0130239	8.38977	7.21204	0.0426161	-4.55246	5.99597e-09	6.49023e-08
406	P406	Unknown_P122	C30 H59 N5 O4					553.454	554.462	15.506		DDA for preferred ion	[M+H]+1	4	●	●	●	●	●	-4.21	0.932137	0.713469	1.13653	0.784968	1.01908	0.849742	0.484519	0.675761	0.757537	0.670806	1	1	0.917238	0.687673	18.7017	19.624	0.749722	-0.415573	0.0465431	0.103272
407	P407	Unknown_P123	C14 H34 N9 O5 P S2					503.184	504.192	0.975		No MS2	[M+H]+1	4	●	●	●	●	●	-3.89	0.237649	0.319691	0.299529	0.255111	0.286468	0.19599	0.24384	0.264984	0.22135	0.278347	1	1	0.279689	0.240902	11.8734	13.7519	0.86132	-0.215378	0.101637	0.197121
408	P408	Unknown_P124	C21 H38 O18					578.204	579.212	0.909		No MS2	[M+H]+1	4	●	●	●	●	●	-2.39	0.197647	0.224633	0.175747	0.21917	0.208325	0.20762	0.182306	0.237865	0.227639	0.193891	1	1	0.205105	0.209864	9.46356	10.9688	1.02321	0.0330987	0.732862	0.818721
409	P409	Unknown_P125	C6 H6 Cl2 N4 S2					267.94	268.947	0.676		No MS2	[M+H]+1	4	●	●	●	●	●	-3.89	0.250043	0.277498	0.284093	0.224754	0.213049	0.00110631	0.000956156	0.000922527	0.00109382	0.000917239	1	1	0.249888	0.000999209	12.5295	9.34461	0.00399863	-7.96628	1.02715e-07	8.48194e-07
410	P410	Unknown_P126	C28 H55 N5 O3					509.428	510.436	15.534		DDA for preferred ion	[M+H]+1	4	●	●	●	●	●	-4.09	0.915695	0.700899	1.13485	0.779356	1.01931	0.8184	0.490894	0.690871	0.764913	0.663274	1	1	0.910021	0.68567	19.2953	18.2103	0.753466	-0.408385	0.0482864	0.105966
411	P411	Unknown_P127	C14 H26 N2 O4					286.188	287.196	0.986		DDA for preferred ion	[M+H]+1	4	●	●	●	●	●	-2.7	38.5237	46.3193	45.0957	40.8695	41.5321	40.2485	41.9328	41.6572	39.6584	41.9815	1	1	42.468	41.0957	7.51352	2.60498	0.967685	-0.047391	0.388536	0.545039
412	P412	Unknown_P128	C3 H6 N2 O5					150.028	151.035	0.675		DDA for preferred ion	[M+H]+1	4	●	●	●	●	●	0.34	34.6549	40.5696	43.4559	39.269	39.2042	1.18995	1.07763	1.15558	1.09513	1.21177	1	1	39.4307	1.14601	8.05835	5.0904	0.029064	-5.10463	3.88348e-09	4.60279e-08
413	P413	Unknown_P129	C6 H11 N O7					209.053	210.06	1.785		DDA for preferred ion	[M+H]+1	4	●	●	●	●	●	-1.63	120.469	129.186	126.456	124.535	120.202	0.109485	0.143504	0.167429	0.102777	0.0870257	1	1	124.17	0.122044	3.11798	26.7886	0.000982882	-9.99069	1.60494e-12	7.1415e-11
414	P414	Unknown_P130	C21 H38 N2 O17					590.216	591.223	0.903		No MS2	[M+H]+1	4	●	●	●	●	●	-2.37	0.170477	0.188808	0.162646	0.182755	0.177337	0.207625	0.165147	0.205609	0.218942	0.169188	1	1	0.176405	0.193302	5.80506	12.6406	1.09579	0.131969	0.19166	0.325943
415	P415	Unknown_P131	C19 H27 N3 O7 S					441.155	442.163	1.415		DDA for preferred ion	[M+H]+1	4	●	●	●	●	●	-3.74	0.167106	0.212503	0.239126	0.291963	0.255114	0.172708	0.177803	0.208267	0.234905	0.25555	1	1	0.233162	0.209847	20.0767	17.058	0.900001	-0.152001	0.402113	0.558161
416	P416	Unknown_P132	C5 H13 O8 P					232.035	233.042	0.863		No MS2	[M+H]+1	4	●	●	●	●	●	-1.01	0.207616	0.230983	0.206798	0.204667	0.191887	0.306036	0.278992	0.264714	0.267642	0.279156	1	1	0.20839	0.279308	6.78543	5.83811	1.34031	0.422568	8.01564e-05	0.000366887
417	P417	Unknown_P133	C6 H9 Cl N2 O3 P2 S					285.951	286.958	0.676		No MS2	[M+H]+1	4	●	●	●	●	●	2.77	0.235176	0.279685	0.302586	0.237269	0.24658	0.00307625	0.00320231	0.00204366	0.00353502	0.00287809	1	1	0.260259	0.00294707	11.3879	18.9568	0.0113236	-6.46453	5.15488e-08	4.53742e-07
418	P418	Unknown_P134	C8 H9 N					119.073	120.081	5.154		DDA for preferred ion	[M+H]+1	4	●	●	●	●	●	-0.43	199.288	222.107	218.898	225.094	225.971	207.417	205.003	213.198	212.942	216.239	1	1	218.272	210.96	5.02544	2.18314	0.966501	-0.0491566	0.206613	0.346954
419	P419	Unknown_P135	C13 H26 N4 O3					286.2	287.207	1.46		DDA for preferred ion	[M+H]+1	4	●	●	●	●	●	-2.2	0.372758	0.412152	0.45605	0.377684	0.411322	0.395848	0.393749	0.387583	0.340621	0.417559	1	1	0.405993	0.387072	8.2412	7.31752	0.953395	-0.0688544	0.362738	0.516999
420	P420	Unknown_P136	C6 H4 N7 O P					221.022	222.029	0.792		No MS2	[M+H]+1	4	●	●	●	●	●	0.34	0.251428	0.26484	0.271662	0.260301	0.246701	0.299669	0.29208	0.294599	0.306005	0.300272	1	1	0.258986	0.298525	3.88401	1.81368	1.15267	0.204977	5.53818e-05	0.00025942
421	P421	Unknown_P137	C8 H4 Cl N O17 P2					482.865	483.872	0.752		No MS2	[M+H]+1	4	●	●	●	●	●	0.56	0.12763	0.131015	0.132015	0.125728	0.122318	0.167394	0.167193	0.181386	0.162316	0.16221	1	1	0.127741	0.1681	3.0933	4.66505	1.31594	0.396091	6.91962e-06	3.71987e-05
422	P422	Unknown_P138	C9 H7 N3 O3 P2 S					298.968	299.975	0.752		No MS2	[M+H]+1	4	●	●	●	●	●	-0.46	0.124906	0.131074	0.134147	0.179849	0.166326	0.153113	0.140946	0.164526	0.157397	0.17203	1	1	0.14726	0.157602	16.4918	7.46536	1.07023	0.0979211	0.416398	0.57407
423	P423	Unknown_P139	C32 H63 N5 O5					597.48	598.488	15.432		DDA for preferred ion	[M+H]+1	4	●	●	●	●	●	-4.4	0.828546	0.626723	0.972095	0.665801	0.858417	0.748545	0.420552	0.574255	0.635472	0.585169	1	1	0.790316	0.592799	18.0513	19.9864	0.750078	-0.414888	0.0444315	0.0988601
424	P424	Unknown_P140	C6 H15 O8 P					246.05	247.057	0.848		No MS2	[M+H]+1	4	●	●	●	●	●	-1.85	0.247376	0.258957	0.268202	0.239306	0.237805	0.296874	0.315992	0.270956	0.304231	0.257475	1	1	0.250329	0.289106	5.21223	8.36947	1.1549	0.207769	0.0135154	0.0351489
425	P425	Unknown_P141	C14 H32 N8 O17 S					616.16	617.168	0.863		No MS2	[M+H]+1	4	●	●	●	●	●	-0.54	0.210289	0.231107	0.24132	0.238871	0.248489	0.252231	0.283318	0.225264	0.245057	0.241985	1	1	0.234015	0.249571	6.2577	8.53444	1.06647	0.0928468	0.215293	0.355566
426	P426	Unknown_P142	C16 H30 N2 O4					314.22	315.227	1.465		No MS2	[M+H]+1	4	●	●	●	●	●	-1.93	4.84991	5.42772	5.48715	4.80406	5.00997	5.25901	5.37631	5.00232	5.04761	5.45993	1	1	5.11576	5.22904	6.29077	3.82742	1.02214	0.0315955	0.522729	0.66886
427	P427	Unknown_P143	C27 H43 N O13 P2					651.221	652.228	0.84		No MS2	[M+H]+1	4	●	●	●	●	●	-0.59	1.12649	1.27703	1.30031	1.21721	1.13716	1.42659	1.47802	1.35167	1.45358	1.3835	1	1	1.21164	1.41867	6.52034	3.61662	1.17087	0.227577	0.0011725	0.00404815
428	P428	Unknown_P144	C13 H27 N O9					341.168	342.175	6.262		DDA for preferred ion	[M+H]+1	4	●	●	●	●	●	-1.09	0.533342	0.601246	0.597055	0.564471	0.545379	0.516084	0.486209	0.519156	0.53548	0.51029	1	1	0.568299	0.513444	5.33313	3.47972	0.903476	-0.146442	0.00824217	0.0230838
429	P429	Unknown_P145	C26 H43 N O11 P2					607.231	608.239	0.977		No MS2	[M+H]+1	4	●	●	●	●	●	0.24	0.118817	0.188217	0.177857	0.166806	0.130872	0.194301	0.198636	0.1439	0.1009	0.163819	1	1	0.156514	0.160311	19.2875	25.0203	1.02426	0.0345825	0.869891	0.90727
430	P430	Unknown_P146	C29 H49 O18 P3					778.213	779.22	0.847		No MS2	[M+H]+1	4	●	●	●	●	●	-0.48	0.23992	0.249843	0.303455	0.27806	0.252587	0.280195	0.299347	0.257805	0.290412	0.276781	1	1	0.264773	0.280908	9.74297	5.57668	1.06094	0.0853403	0.266156	0.410523
431	P431	Unknown_P147	C8 H19 N					129.152	130.159	7.036		DDA for preferred ion	[M+H]+1	4	●	●	●	●	●	0.13	1.8456	5.0883	1.25882	2.04035	2.26352	3.28722	0.708322	0.829649	1.06685	1.45309	1	1	2.49932	1.46902	59.8001	71.8421	0.58777	-0.766676	0.243473	0.390826
432	P432	Unknown_P148	C5 H5 N4 P					152.025	153.033	0.675		No MS2	[M+H]+1	4	●	●	●	●	●	0.63	4.92813	5.77643	6.30214	5.71862	5.70489	0.158344	0.150129	0.158508	0.153005	0.167761	1	1	5.68604	0.15755	8.63192	4.27597	0.0277081	-5.17355	6.61536e-09	6.97225e-08
433	P433	Unknown_P149	C7 H23 N7 P2 S					299.121	300.128	1.038		No MS2	[M+H]+1	4	●	●	●	●	●	-0.11	0.254095	0.267466	0.27057	0.271021	0.259311	0.271562	0.259778	0.223304	0.274706	0.267335	1	1	0.264493	0.259337	2.8252	8.06121	0.980508	-0.0283992	0.617632	0.743944
434	P434	Unknown_P150	C4 H5 N O					83.0374	84.0447	1.952		DDA for preferred ion	[M+H]+1	4	●	●	●	●	●	3.6	23.9042	26.7928	26.7935	26.1589	25.8512	26.1221	25.3615	26.8543	26.2322	27.1692	1	1	25.9001	26.3479	4.58789	2.66246	1.01729	0.024728	0.488776	0.641411
435	P435	Unknown_P151	C47 H29 N					607.231	608.238	0.842		No MS2	[M+H]+1	4	●	●	●	●	●	1.81	0.250029	0.257329	0.270507	0.274153	0.244627	0.342287	0.34334	0.30085	0.343739	0.341075	1	1	0.259329	0.334258	4.92066	5.59573	1.28893	0.366179	7.62201e-05	0.000350875
436	P436	Unknown_P152	C10 H14 N2 O4 S					258.067	259.075	6.721		DDA for preferred ion	[M+H]+1	4	●	●	●	●	●	-0.66	0.657438	0.729465	0.764507	0.758922	0.7574	0.757138	0.694724	0.779587	0.720407	0.755845	1	1	0.733546	0.74154	6.0892	4.5401	1.0109	0.0156365	0.757484	0.836889
437	P437	Unknown_P153	C12 H27 N O2					217.204	218.211	10.116		DDA for preferred ion	[M+H]+1	4	●	●	●	●	●	-0.88	1.16723	0.480104	0.982247	0.817089	1.05624	0.888766	0.560655	0.761201	0.870297	0.439274	1	1	0.900581	0.704039	29.6794	28.0226	0.78176	-0.355202	0.222433	0.366602
438	P438	Unknown_P154	C6 H2 O4					137.995	139.002	1.782		DDA for preferred ion	[M+H]+1	4	●	●	●	●	●	-1.42	22.782	24.6398	24.0899	22.8316	22.2862	0.0110254	0.190218	0.0207857	0.0116227	0.00934284	1	1	23.3259	0.0485989	4.24996	163.158	0.00208347	-8.90679	1.96873e-11	6.06518e-10
439	P439	Unknown_P155	C35 H52 N3 O10 P3 S					799.257	800.264	0.821		No MS2	[M+H]+1	4	●	●	●	●	●	-1.85	0.185897	0.203251	0.200833	0.228749	0.165788	0.221152	0.230877	0.220812	0.218785	0.217549	1	1	0.196904	0.221835	11.7995	2.37399	1.12662	0.171998	0.0474074	0.10461
440	P440	Unknown_P156	C11 H23 N O6					265.152	266.159	0.777		No MS2	[M+H]+1	4	●	●	●	●	●	-1.37	0.441167	0.443555	0.48949	0.543091	0.535182	0.533459	0.539606	0.584903	0.482293	0.525688	1	1	0.490497	0.53319	9.88368	6.86689	1.08704	0.120404	0.15474	0.274826
441	P441	Unknown_P157	C9 H8 N6					200.081	201.089	0.751		No MS2	[M+H]+1	4	●	●	●	●	●	1	0.312715	0.334634	0.319537	0.325175	0.315412	0.344977	0.344369	0.335292	0.324782	0.323932	1	1	0.321495	0.334671	2.71216	3.03902	1.04098	0.0579465	0.0590678	0.123857
442	P442	Unknown_P158	C2 H6 Cl O15 P3 S4					525.749	526.757	0.747		No MS2	[M+H]+1	4	●	●	●	●	●	0.3	0.365816	0.404261	0.39334	0.413824	0.440775	0.510929	0.485222	0.516886	0.499283	0.520923	1	1	0.403603	0.506649	6.80785	2.86068	1.25531	0.328049	7.49473e-05	0.00034701
443	P443	Unknown_P159	C5 H3 N8 O P					222.017	223.024	0.736		No MS2	[M+H]+1	4	●	●	●	●	●	1.1	0.202003	0.228151	0.218649	0.209643	0.208014	0.199979	0.206704	0.204804	0.209049	0.224549	1	1	0.213292	0.209017	4.79342	4.44984	0.979956	-0.0292118	0.508719	0.658294
444	P444	Unknown_P160	C19 H37 N O16					535.21	536.217	0.869		No MS2	[M+H]+1	4	●	●	●	●	●	-2.06	1.05876	1.19843	1.15971	1.15145	1.13859	1.19715	1.30852	1.24063	1.26661	1.12477	1	1	1.14139	1.22753	4.49425	5.72287	1.07547	0.104973	0.0576763	0.121896
445	P445	Unknown_P161	C35 H48 N3 O17 P					813.273	814.28	0.845		No MS2	[M+H]+1	4	●	●	●	●	●	1.12	0.485649	0.557818	0.582639	0.515379	0.499544	0.570383	0.601217	0.592254	0.593874	0.619256	1	1	0.528206	0.595397	7.71171	2.95837	1.12721	0.172752	0.00956369	0.0261451
446	P446	Unknown_P162	C4 H5 N O					83.0374	84.0447	0.846		DDA for preferred ion	[M+H]+1	4	●	●	●	●	●	3.52	4.94468	5.32607	5.44585	5.35528	5.41158	5.19345	5.12989	5.17085	5.35778	5.32579	1	1	5.29669	5.23555	3.81887	1.91493	0.988457	-0.0167493	0.561594	0.698504
447	P447	Unknown_P163	C5 H10 O8					198.038	199.045	0.676		No MS2	[M+H]+1	4	●	●	●	●	●	-0.02	0.225244	0.240349	0.254073	0.240311	0.24315	0.01263	0.0105706	0.00980358	0.00970923	0.0113477	1	1	0.240625	0.0108122	4.27857	11.2169	0.0449338	-4.47605	3.0361e-11	9.00714e-10
448	P448	Unknown_P164	C13 H27 N O11					373.158	374.165	0.897		DDA for preferred ion	[M+H]+1	4	●	●	●	●	●	-2.12	6.92019	6.93937	6.97613	7.27604	6.64431	7.18331	6.94144	7.66438	7.54172	6.72445	1	1	6.9512	7.21106	3.22825	5.48206	1.03738	0.052948	0.236996	0.385059
449	P449	Unknown_P165	C7 H6					90.047	91.0543	5.142		DDA for preferred ion	[M+H]+1	4	●	●	●	●	●	1.01	2.04751	2.02204	2.12616	2.10575	2.11981	1.9031	1.87214	1.96939	1.9161	2.07726	1	1	2.08426	1.9476	2.23792	4.13588	0.934433	-0.0978365	0.0111391	0.0300419
450	P450	Unknown_P166	C14 H31 N O2					245.235	246.242	11.875		DDA for preferred ion	[M+H]+1	4	●	●	●	●	●	-1.85	0.60827	0.464005	0.557606	0.45704	0.610698	0.478668	0.308719	0.411586	0.461177	0.414508	1	1	0.539524	0.414931	13.9398	15.9379	0.76907	-0.378814	0.0238567	0.0580827
451	P451	Unknown_P167	C13 H32 N5 O6 P S2					449.154	450.161	5.071		DDA for preferred ion	[M+H]+1	4	●	●	●	●	●	1.39	0.250306	0.27546	0.27759	0.248285	0.274208	0.323213	0.291431	0.312006	0.298733	0.277458	1	1	0.26517	0.300568	5.49051	5.91559	1.13349	0.180775	0.00876774	0.0241339
452	P452	Unknown_P168						110.002	111.01	0.675		No MS2	[M+H]+1	4	●	●	●	●	●		7.05533	8.27005	8.22653	7.74102	7.40904	0.16034	0.154379	0.157143	0.14997	0.156568	1	1	7.74039	0.15568	6.76252	2.46579	0.0201127	-5.63575	8.97468e-10	1.56276e-08
453	P453	Unknown_P169						233.109	234.116	2.18		DDA for preferred ion	[M+H]+1	4	●	●	●	●	●		7.00709	7.59257	7.43255	7.53103	7.38127	7.26742	6.90674	7.38664	7.55906	7.53035	1	1	7.3889	7.33004	3.09675	3.60225	0.992035	-0.0115377	0.716215	0.807977
454	P454	Unknown_P170						123.915	124.923	0.75		DDA for preferred ion	[M+H]+1	4	●	●	●	●	●		1.84849	1.92166	2.04075	1.95916	1.90633	2.11629	2.05772	2.21122	2.11414	2.26092	1	1	1.93528	2.15206	3.67644	3.81548	1.11201	0.153176	0.00210689	0.0066969
455	P455	Unknown_P171						457.762	458.769	0.748		DDA for preferred ion	[M+H]+1	4	●	●	●	●	●		0.774457	0.829392	0.864967	0.729422	0.806313	1.02729	0.980287	1.09201	1.09177	1.0975	1	1	0.80091	1.05777	6.47396	4.92131	1.32071	0.401315	5.15522e-05	0.000242902
456	P456	Unknown_P172						139.054	140.061	0.928		No MS2	[M+H]+1	4	●	●	●	●	●		0.402554	0.470468	0.414739	0.45855	0.435676	0.445052	0.376373	0.455264	0.43464	0.449584	1	1	0.436397	0.432182	6.54834	7.42771	0.990341	-0.0140024	0.831907	0.883763
457	P457	Unknown_P173						127.012	128.019	0.674		DDA for preferred ion	[M+H]+1	4	●	●	●	●	●		33.7445	42.1205	48.8681	38.0451	43.6483	1.65552	1.43218	1.53851	1.49408	1.66053	1	1	41.2853	1.55616	13.8691	6.4503	0.0376929	-4.72956	2.96893e-07	2.16192e-06
458	P458	Unknown_P174						273.866	274.873	0.747		DDA for preferred ion	[M+H]+1	4	●	●	●	●	●		1.33648	1.51111	1.53755	1.83812	1.81333	1.75981	1.69491	1.83785	1.76802	1.83027	1	1	1.60732	1.77817	13.3142	3.28505	1.10629	0.145734	0.12334	0.228694
459	P459	Unknown_P175						145.022	146.03	0.674		DDA for preferred ion	[M+H]+1	4	●	●	●	●	●		1.57161	1.98497	2.27481	1.73912	2.07364	0.128509	0.122969	0.133343	0.127557	0.146666	1	1	1.92883	0.131809	14.3727	6.89303	0.0683361	-3.87121	5.04579e-07	3.39637e-06
460	P460	Unknown_P176						167.085	168.093	5.156		DDA for preferred ion	[M+H]+1	4	●	●	●	●	●		1.78136	1.99442	2.08916	2.14979	2.14099	2.00958	1.97343	2.03692	2.00566	2.02579	1	1	2.03114	2.01027	7.51712	1.20062	0.989725	-0.0148998	0.770439	0.846287
461	P461	Unknown_P177						152.941	153.948	0.679		DDA for preferred ion	[M+H]+1	4	●	●	●	●	●		0.189158	0.270292	0.213883	0.191595	0.185859	0.349542	0.248625	0.237988	0.248631	0.264384	1	1	0.210157	0.269834	16.8333	16.8781	1.28396	0.360601	0.0493857	0.107787
462	P462	Unknown_P178						85.9857	86.9929	0.674		DDA for preferred ion	[M+H]+1	4	●	●	●	●	●		1.80458	2.43671	2.94835	2.01932	2.61715	0.067197	0.0525761	0.0592531	0.0609004	0.0680623	1	1	2.36522	0.0615978	19.4045	10.284	0.0260431	-5.26295	3.56647e-06	1.99772e-05
463	P463	Unknown_P179						151.029	152.036	0.675		No MS2	[M+H]+1	4	●	●	●	●	●		3.98179	4.65215	4.92965	4.46709	4.49269	0.135409	0.120286	0.129422	0.121286	0.14245	1	1	4.50467	0.129771	7.6685	7.25576	0.028808	-5.11739	2.62022e-09	3.22892e-08
464	P464	Unknown_P180						972.315	973.323	0.987		No MS2	[M+H]+1	4	●	●	●	●	●		0.147313	0.182008	0.206406	0.177132	0.216947	0.1616	0.184206	0.155171	0.191718	0.15166	1	1	0.185961	0.168871	14.6416	10.6504	0.908098	-0.13908	0.275257	0.422685
465	P465	Unknown_P181						92.0499	93.0572	0.929		No MS2	[M+H]+1	4	●	●	●	●	●		0.209319	0.237554	0.220063	0.2585	0.241853	0.218289	0.198066	0.245561	0.241786	0.239721	1	1	0.233458	0.228685	8.22946	8.81059	0.979555	-0.0298015	0.711439	0.807977
466	P466	Unknown_P182						436.965	437.972	1.78		DDA for preferred ion	[M+H]+1	4	●	●	●	●	●		2.94679	2.94898	2.86363	2.82822	2.76385	0.0108235	0.0121186	0.0147662	0.0131188	0.0107181	1	1	2.87029	0.012309	2.76459	13.7557	0.00428842	-7.86534	6.31273e-13	3.61149e-11
467	P467	Unknown_P183						257.892	258.899	0.747		No MS2	[M+H]+1	4	●	●	●	●	●		0.128287	0.155978	0.149168	0.217317	0.208843	0.179255	0.169017	0.18815	0.172471	0.176382	1	1	0.171919	0.177055	22.7146	4.13118	1.02988	0.0424697	0.779876	0.851064
468	P468	Unknown_P184						148.945	149.953	0.681		DDA for preferred ion	[M+H]+1	4	●	●	●	●	●		0.475419	0.711546	0.485403	0.464517	0.509546	0.924025	0.670949	0.615414	0.656935	0.680484	1	1	0.529286	0.709561	19.5048	17.2554	1.3406	0.422879	0.0359751	0.0828047
469	P469	Unknown_P185						373.801	374.808	0.748		DDA for preferred ion	[M+H]+1	4	●	●	●	●	●		0.663355	0.708324	0.776989	0.699418	0.729087	0.847841	0.826619	0.936904	0.890625	0.923529	1	1	0.715435	0.885104	5.84498	5.35892	1.23716	0.307027	0.000323441	0.00128256
470	P470	Unknown_P186						319.858	320.866	0.726		DDA for preferred ion	[M+H]+1	4	●	●	●	●	●		0.228862	0.302254	0.26418	0.226033	0.231895	0.013596	0.0120387	0.0111897	0.0128829	0.01243	1	1	0.250645	0.0124275	13.0485	7.25996	0.0495819	-4.33404	2.03851e-07	1.55509e-06
471	P471	Unknown_P187						240.992	241.999	0.674		DDA for preferred ion	[M+H]+1	4	●	●	●	●	●		4.02192	4.92344	5.46054	4.28049	4.50785	0.0347728	0.0354639	0.0348998	0.0355465	0.0419215	1	1	4.63885	0.0365209	12.2057	8.31839	0.00787283	-6.9889	8.6285e-08	7.35258e-07
472	P472	Unknown_P188						81.0068	82.0141	0.674		DDA for preferred ion	[M+H]+1	4	●	●	●	●	●		14.451	17.0281	19.3626	15.9629	17.3813	0.54674	0.464288	0.479349	0.520222	0.524637	1	1	16.8372	0.507047	10.7762	6.72721	0.0301148	-5.05339	3.88445e-08	3.49601e-07
473	P473	Unknown_P189						205.878	206.886	0.749		DDA for preferred ion	[M+H]+1	4	●	●	●	●	●		3.6319	3.83464	4.02789	3.82155	3.72792	4.42895	4.31384	4.60588	4.37512	4.58263	1	1	3.80878	4.46128	3.86471	2.87582	1.17132	0.228131	7.11271e-05	0.000331237
474	P474	Unknown_P190						189.904	190.912	0.747		DDA for preferred ion	[M+H]+1	4	●	●	●	●	●		0.595093	0.60865	0.631448	0.799577	0.757979	0.714406	0.713134	0.77969	0.701946	0.76609	1	1	0.678549	0.735053	13.7906	4.78994	1.08327	0.115395	0.241915	0.389104
475	P475	Unknown_P191						211.844	212.851	0.771		DDA for preferred ion	[M+H]+1	4	●	●	●	●	●		0.647029	0.772572	0.807325	0.684499	0.657225	0.776061	0.701927	0.739976	0.726195	0.773587	1	1	0.71373	0.743549	10.0837	4.25593	1.04178	0.0590496	0.421031	0.576489
476	P476	Unknown_P192						83.0043	84.0116	0.674		DDA for preferred ion	[M+H]+1	4	●	●	●	●	●		2.74568	3.14754	3.62695	3.04304	3.13945	0.0922961	0.0848219	0.0832182	0.0929692	0.09538	1	1	3.14053	0.0897371	10.0953	5.98791	0.0285738	-5.12916	2.29464e-08	2.08864e-07
477	P477	Unknown_P193						128.013	129.02	0.675		No MS2	[M+H]+1	4	●	●	●	●	●		4.17329	5.21729	5.9911	4.63852	5.22838	0.200246	0.167579	0.172866	0.178412	0.189625	1	1	5.04972	0.181746	13.5886	7.25277	0.0359913	-4.79621	2.49897e-07	1.8534e-06
478	P478	Unknown_P194						293.836	294.843	0.748		No MS2	[M+H]+1	4	●	●	●	●	●		0.185148	0.186003	0.181998	0.177451	0.170095	0.224966	0.217248	0.232688	0.218975	0.231093	1	1	0.180139	0.224994	3.62999	3.08428	1.249	0.320776	5.81013e-06	3.16593e-05
479	P479	Unknown_P195						289.839	290.847	0.749		DDA for preferred ion	[M+H]+1	4	●	●	●	●	●		5.85604	6.32419	6.52705	6.02448	6.19338	7.30147	7.08104	7.82388	7.45414	7.74005	1	1	6.18503	7.48012	4.20383	4.10746	1.20939	0.274281	9.29132e-05	0.000418109
480	P480	Unknown_P196						83.9043	84.9115	0.754		No MS2	[M+H]+1	4	●	●	●	●	●		0.249622	0.264332	0.284932	0.259103	0.252586	0.26351	0.261342	0.286671	0.286468	0.281467	1	1	0.262115	0.275892	5.33259	4.52765	1.05256	0.0739021	0.138938	0.254085
481	P481	Unknown_P197						121.917	122.924	0.75		DDA for preferred ion	[M+H]+1	4	●	●	●	●	●		12.3794	12.9599	13.7032	13.2107	12.8845	14.3463	14.0461	15.0434	14.0495	14.9219	1	1	13.0275	14.4815	3.71149	3.28304	1.1116	0.152642	0.00136541	0.00463429
482	P482	Unknown_P198						693.672	694.679	0.747		No MS2	[M+H]+1	4	●	●	●	●	●		0.0985461	0.0993974	0.105978	0.111226	0.116262	0.154035	0.12682	0.156609	0.142106	0.145272	1	1	0.106282	0.144968	7.1561	8.12788	1.364	0.447842	0.000268576	0.00108651
483	P483	Unknown_P199						211.835	212.842	0.758		DDA for preferred ion	[M+H]+1	4	●	●	●	●	●		0.537826	0.650265	0.647436	0.603689	0.642534	0.605788	0.586662	0.636256	0.608157	0.619117	1	1	0.61635	0.611196	7.75072	2.98472	0.991637	-0.0121156	0.827327	0.880066
484	P484	Unknown_P200						99.0172	100.024	0.674		DDA for preferred ion	[M+H]+1	4	●	●	●	●	●		4.62172	6.02177	8.23838	5.24802	7.63359	0.320818	0.244332	0.265683	0.294702	0.324223	1	1	6.3527	0.289952	24.2879	11.9719	0.0456423	-4.45348	2.21455e-05	0.000111563
485	N001	N-Acetyl-L-ornithine	C7 H14 N2 O3	439232	6205-08-9	HMDB0006489	C00437	174.1	173.092	1.008	86.4	DDA for preferred ion	[M-H]-1	1	●	●	●	●	●	0.14	0.413401	0.438675	0.524603	0.501117	0.495858	0.448962	0.506117	0.512913	0.486486	0.515388	1	1	0.474731	0.493973	9.81884	5.58718	1.04053	0.0573221	0.449954	0.610869
486	N002	Mucic acid	C6 H10 O8					210.037	209.03	0.846	64.5	DDA for preferred ion	[M-H]-1	1	●	●	●	●	●	-3.25	109.615	115.797	111.312	110.921	105.014	88.1677	86.4507	94.0529	88.2626	90.1811	1	1	110.532	89.423	3.49729	3.24913	0.809025	-0.305744	1.01674e-05	5.39344e-05
487	N003	DL-Arginine	C6 H14 N4 O2	232	7200-25-1,7004-12-8			174.111	173.104	0.771	60.6	DDA for preferred ion	[M-H]-1	1	●	●	●	●	●	-4.33	0.472296	0.453544	0.464548	0.558744	0.494188	0.472	0.501344	0.504954	0.506277	0.551062	1	0	0.488664	0.507127	8.57572	5.57999	1.03778	0.0535054	0.437867	0.596482
488	N004	Cis-Aconitic acid	C6 H6 O6	643757	585-84-2	HMDB0000461	C00417	174.016	173.008	1.419		DDA for preferred ion	[M-H]-1	1	●	●	●	●	●	0.15	4.2212	4.84073	4.63987	5.35578	4.82834	4.48385	5.01181	4.72947	5.29963	5.0947	1	1	4.77718	4.92389	8.56329	6.49831	1.03071	0.0436385	0.545242	0.689951
489	N005	isocitric acid	C6 H8 O7					192.026	191.019	1.789	99.2	DDA for preferred ion	[M-H]-1	1	●	●	●	●	●	-4.23	470.956	506.56	492.676	502.858	481.812	0.794906	0.705129	0.7149	0.527517	0.692759	1	1	490.972	0.687042	3.00677	14.2274	0.00139935	-9.48103	1.20459e-12	5.6755e-11
490	N006	Alpha-ketoglutaric acid	C5 H6 O5	51	328-50-7	HMDB0002812	C00026	146.021	145.013	1.445	89.9	DDA for preferred ion	[M-H]-1	1	●	●	●	●	●	0.16	0.524414	0.570346	0.58347	0.636339	0.619763	0.650557	0.580311	0.661711	0.668256	0.735261	1	1	0.586867	0.659219	7.48317	8.36793	1.12329	0.167726	0.0509046	0.110484
491	N007	Fructose 6-phosphate	C6 H13 O9 P	69507	643-13-0	HMDB0000124	C00085	260.029	259.022	0.794	83.3	DDA for preferred ion	[M-H]-1	1	●	●	●	●	●	-1.56	8.35538	8.23441	8.35837	9.1114	8.57739	8.16873	8.58151	9.20905	8.52652	8.62372	1	1	8.52739	8.62191	4.0942	4.34293	1.01108	0.0159026	0.690582	0.794119
492	N008	Xanthosine	C10 H12 N4 O6	64959	146-80-5	HMDB00299	C01762	284.075	283.068	5.078	80.6	DDA for preferred ion	[M-H]-1	1	●	●	●	●	●	-0.85	0.453305	0.519927	0.508025	0.502297	0.512235	0.540135	0.555146	0.543254	0.572276	0.563658	1	1	0.499158	0.554894	5.29405	2.43845	1.11166	0.152716	0.00300501	0.00940238
493	N009	N-Acetyl-L-aspartic acid	C6 H9 N O5	65065	997-55-7	HMDB0000812	C01042	175.047	174.04	1.528	61.9	DDA for preferred ion	[M-H]-1	1	●	●	●	●	●	0.17	0.386802	0.427488	0.424115	0.424598	0.445147	0.83793	0.724529	0.783554	0.808879	0.802508	0	1	0.42163	0.79148	5.05265	5.33322	1.87719	0.908576	1.16512e-07	9.42686e-07
494	N010	4-pyridoxic acid	C8 H9 N O4	6723	82-82-6	HMDB0000017	C00847	183.052	182.045	0.934		DDA for preferred ion	[M-H]-1	1	●	●	●	●	●	-4.46	2.85168	2.79741	2.84437	2.6891	2.91376	2.72306	2.75439	3.20211	2.91323	2.85587	1	1	2.81926	2.88973	2.96929	6.59718	1.025	0.0356173	0.470872	0.630304
495	N011	2,5-DIHYDROXYBENZOIC ACID	C7 H6 O4	3469	490-79-9	HMDB0000152	C00628	154.026	153.018	7.638	92.7	DDA for preferred ion	[M-H]-1	1	●	●	●	●	●	0.18	0.52676	0.652651	0.604722	0.652489	0.633127	0.852734	0.859098	0.866695	0.869722	0.914004	0	1	0.61395	0.872451	8.55623	2.76887	1.42105	0.506953	8.50653e-06	4.54249e-05
496	N012	3-Hydroxyglutaric acid	C5 H8 O5	181976	638-18-6	HMDB0000428		148.036	147.029	2.601		DDA for preferred ion	[M-H]-1	1	●	●	●	●	●	0.19	8.84813	9.95078	10.0244	10.2911	9.94024	9.65786	9.5477	9.86893	9.76861	10.0781	1	1	9.81092	9.78424	5.67358	2.08025	0.997281	-0.00392767	0.922317	0.941116
497	N013	Traumatic acid	C12 H20 O4					228.136	227.128	8.184		DDA for preferred ion	[M-H]-1	1	●	●	●	●	●	-2.16	0.0175485	0.0185875	0.0193782	0.0199792	0.0207188	0.800801	0.771624	0.801387	0.800007	0.815558	0	1	0.0192424	0.797875	6.38559	2.00847	41.4643	5.3738	5.89528e-14	1.57294e-11
498	N014	N-METHYL-ASPARTIC ACID	C5 H9 N O4	22880	6384-92-5	HMDB0002393	C12269	147.052	146.045	0.852	62.3	DDA for preferred ion	[M-H]-1	1	●	●	●	●	●	0.2	8.56726	8.83416	8.29636	8.99817	8.65585	9.40265	8.76796	9.61333	9.20675	9.13724	1	1	8.67036	9.22558	3.07865	3.42464	1.06404	0.0895484	0.017028	0.0432997
499	N015	D-(+)-Xylose	C5 H10 O5					150.052	149.045	1.027	65.9	DDA for preferred ion	[M-H]-1	1	●	●	●	●	●	0.21	1.13438	1.22349	1.08735	1.23194	1.21116	1.33447	0.574072	1.36413	1.23237	1.24279	1	1	1.17766	1.14957	5.40373	28.4206	0.976142	-0.0348367	0.854991	0.899931
500	N016	Uric acid	C5 H4 N4 O3	1175	69-93-2	HMDB00289	C00366	168.027	167.02	1.759	91.5	DDA for preferred ion	[M-H]-1	1	●	●	●	●	●	0.22	2.58231	1.17143	3.92909	4.54752	3.1685	8.39693	13.8917	7.86502	10.5361	15.8254	1	1	3.07977	11.303	42.2508	30.6496	3.67008	1.87581	0.00109475	0.00386297
501	N017	Inositol-2,4-diphosphate	C6 H12 Na2 O12 P2					339.996	338.989	0.746	83.3	DDA for preferred ion	[M-H]-1	1	●	●	●	●	●	0.23	4.47619	4.33621	4.09219	4.51144	4.40677	1.93186	2.03904	2.13876	2.13155	1.92667	1	1	4.36456	2.03358	3.81344	5.06679	0.46593	-1.10182	4.2573e-09	4.87157e-08
502	N018	Isomaltose	C12 H22 O11					342.116	341.109	0.877	81.5	DDA for preferred ion	[M-H]-1	1	●	●	●	●	●	-0.97	0.402248	0.497597	0.888343	0.532612	0.552527	0.344533	0.422884	0.453637	0.416139	0.427289	1	Missing ions	0.574665	0.412896	32.1243	9.87559	0.718499	-0.476942	0.0920591	0.182587
503	N019	Sucrose	C12 H22 O11	5988	57-50-1	HMDB00258	C00089	342.116	387.114	0.99	87.8	DDA for preferred ion	[M+FA-H]-1	1	●	●	●	●	●	-1.05	36.7021	34.6325	35.5771	40.3055	36.5473	37.4792	41.3588	44.5774	35.7379	38.755	1	1	36.7529	39.5817	5.85847	8.75123	1.07697	0.106974	0.159532	0.281054
504	N020	N-acetyltryptophan	C13 H14 N2 O3	700653	1218-34-4	HMDB0013713		246.1	245.093	8.962	96.1	DDA for preferred ion	[M-H]-1	1	●	●	●	●	●	-1.63	15.1411	9.29247	16.7011	8.63861	7.98093	8.11986	7.69324	7.97609	7.68789	8.506	1	1	11.5509	7.99662	35.0974	4.25195	0.692297	-0.530538	0.086519	0.172855
505	N021	DL-3-Phenyllactic acid	C9 H10 O3	3848	828-01-3	HMDB00779		166.062	165.055	8.713	99.1	DDA for preferred ion	[M-H]-1	1	●	●	●	●	●	0.24	2.46104	2.74333	2.48702	2.4978	2.36455	28.8709	25.0273	25.9227	25.3174	28.3272	1	1	2.51075	26.6931	5.58568	6.66858	10.6315	3.41028	1.53454e-09	2.08333e-08
506	N022	Malic acid	C4 H6 O5	525	97-67-6	HMDB0000156	C00149	134.02	133.013	1.42	93.2	DDA for preferred ion	[M-H]-1	1	●	●	●	●	●	0.25	2.26156	2.48144	2.65914	2.33274	2.26132	1.7006	1.54076	1.57328	1.7162	1.81149	1	1	2.39924	1.66847	7.11927	6.64288	0.695415	-0.524054	4.2692e-05	0.00020725
507	N023	N-Acetyl-L-Phenylalanine	C11 H13 N O3	74839	2018-61-3	HMDB0000512	C03519	207.089	206.082	8.467	87.9	DDA for preferred ion	[M-H]-1	1	●	●	●	●	●	-2.79	3.8988	4.36283	4.29463	4.31404	2.46186	4.49891	4.03016	4.33963	4.52492	4.51535	1	1	3.86643	4.38179	20.8679	4.80695	1.13329	0.180519	0.204346	0.343868
508	N024	Raffinose	C18 H32 O16	439242				504.168	549.167	1.311	83.5	DDA for preferred ion	[M+FA-H]-1	1	●	●	●	●	●	-1.38	7.53364	7.95161	7.74243	7.8243	7.77585	8.09386	7.66148	8.13781	7.98489	7.91758	1	1	7.76557	7.95912	1.95816	2.35946	1.02492	0.0355183	0.111047	0.2088
509	N025	{(1R,2R)-2-[(2Z)-5-(Hexopyranosyloxy)-2-penten-1-yl]-3-oxocyclopentyl}acetic acid	C18 H28 O9					388.173	387.166	7.496	74.6	DDA for preferred ion	[M-H]-1	2	●	●	●	●	●	-0.66	8.89028	7.84366	7.69234	8.9241	9.49779	0.0315701	0.0278117	0.031276	0.0323469	0.0306048	1	0	8.56963	0.0307219	9.01363	5.67296	0.00358497	-8.12382	7.668e-09	7.97672e-08
510	N026	DL-Tryptophan	C11 H12 N2 O2	1148	54-12-6	HMDB30396	C00806	204.089	203.082	6.283	98.9	DDA for preferred ion	[M-H]-1	2	●	●	●	●	●	-2.83	2.61849	2.8841	2.83018	2.8573	2.81118	2.73649	2.62513	2.75591	2.75656	2.7789	1	1	2.80025	2.7306	3.75971	2.22811	0.975126	-0.0363391	0.236125	0.384423
511	N027	NP-020139	C13 H16 O9					316.079	315.072	5.544	97.8	DDA for preferred ion	[M-H]-1	2	●	●	●	●	●	0	0.63303	0.700756	0.682607	0.75858	0.7462	0.00155501	0.00187431	0.00180369	0.00222853	0.00244049	1	0	0.704235	0.00198041	7.19315	17.7934	0.00281214	-8.47412	1.27525e-09	1.89163e-08
512	N028	NP-011548	C18 H34 O3					298.251	297.243	14.053	86.7	DDA for preferred ion	[M-H]-1	2	●	●	●	●	●	-0.5	0.0484028	0.0496606	0.0483697	0.0475561	0.0491078	0.467646	0.424619	0.495884	0.486088	0.488778	0	1	0.0486194	0.472603	1.6462	6.08908	9.72047	3.28103	7.88463e-10	1.40346e-08
513	N029	NP-015948	C21 H30 O10					442.183	441.176	8.643	90.2	DDA for preferred ion	[M-H]-1	2	●	●	●	●	●	-1.18	12.3309	12.8979	9.90646	9.94721	4.36035	8.89258	7.54867	7.35386	7.08049	6.49868	1	1	9.88856	7.47485	34.1391	11.8502	0.755909	-0.403715	0.16059	0.281471
514	N030	3-(tert-Butyl)-N-[4-(2,3-dihydroimidazo[2,1-b][1,3]thiazol-6-yl)phenyl]-1-methyl-1H-pyrazole-5-carboxamide	C20 H23 N5 O S					381.163	380.156	5.749	77.2	DDA for preferred ion	[M-H]-1	2	●	●	●	●	●	2.53	0.936253	1.09222	1.02294	1.04319	1.0331	0.303031	0.270547	0.280476	0.286204	0.287101	1	0	1.02554	0.285472	5.5146	4.14194	0.278362	-1.84496	2.38807e-09	2.98882e-08
515	N031	Gluconic acid	C6 H12 O7	10690	526-95-4	HMDB0003373	C00257	196.058	195.05	0.863	96.8	DDA for preferred ion	[M-H]-1	2	●	●	●	●	●	-3.47	5.57051	6.07961	5.85439	6.75656	6.67232	2.56491	2.71639	2.59828	3.15043	2.54013	1	1	6.18668	2.71403	8.32927	9.32725	0.438689	-1.18873	8.57363e-07	5.45038e-06
516	N032	DL-4-Hydroxyphenyllactic acid	C9 H10 O4	9378	306-23-0	HMDB00755	C03672	182.057	181.05	6.351	74.1	DDA for preferred ion	[M-H]-1	2	●	●	●	●	●	-3.8	0.176922	0.195789	0.185261	0.1872	0.183068	1.22626	1.1031	1.14628	1.06846	1.19031	1	1	0.185648	1.14688	3.69473	5.55828	6.17772	2.62707	6.84362e-10	1.30518e-08
517	N033	NP-015948	C21 H30 O10					442.183	441.176	7.664	86.8	DDA for preferred ion	[M-H]-1	2	●	●	●	●	●	-0.93	0.618514	0.665732	0.650255	0.662724	0.63427	0.450488	0.417024	0.433626	0.440951	0.458012	1	1	0.646299	0.44002	3.07491	3.60023	0.680831	-0.554632	8.72641e-08	7.35774e-07
518	N034	Porphobilinogen	C10 H14 N2 O4	1021	487-90-1	HMDB00245	C00931	226.095	225.088	5.554	70.8	DDA for preferred ion	[M-H]-1	2	●	●	●	●	●	-1.88	0.497829	0.55462	0.541824	0.537238	0.523214	0.560651	0.5451	0.577099	0.544299	0.569359	1	1	0.530945	0.559301	4.07767	2.60098	1.05341	0.0750632	0.0411448	0.0923166
519	N035	Citric acid	C6 H8 O7	311	77-92-9	HMDB00094	C00158	192.026	191.019	6.924	98.6	DDA for preferred ion	[M-H]-1	2	●	●	●	●	●	-3.76	1.04117	1.11146	2.88504	1.1121	1.08436	0.713751	0.689265	0.668986	0.574715	0.692038	1	1	1.44683	0.667751	55.6049	8.14284	0.461528	-1.11551	0.0627446	0.130959
520	N036	2-Isopropylmalic acid	C7 H12 O5	77	3237-44-3			176.068	175.06	6.859	69.6	DDA for preferred ion	[M-H]-1	2	●	●	●	●	●	-4.72	1.59173	1.86936	1.99779	1.95193	1.90544	1.75454	1.63867	1.79996	1.89592	1.91391	1	1	1.86325	1.8006	8.54952	6.22578	0.966377	-0.0493419	0.49251	0.642509
521	N037	N-(Phenylacetyl)aspartic acid	C12 H13 N O5					251.079	250.072	7.864		DDA for preferred ion	[M-H]-1	3	●	●	●	●	●	-1.35	3.09249	3.53622	3.47142	3.52619	3.4132	3.43942	3.2969	3.40437	3.47946	3.61869	1	1	3.4079	3.44777	5.37088	3.3989	1.0117	0.0167779	0.692465	0.794648
522	N038	CAY10685	C17 H16 Cl N3 S					329.075	328.067	0.932		No MS2	[M-H]-1	3	●	●	●	●	●	-2.53	0.165714	0.168006	0.155189	0.14285	0.163548	0.119674	0.111692	0.151382	0.128916	0.122245	1	0	0.159061	0.126782	6.45902	11.8873	0.797063	-0.327234	0.00419311	0.0127223
523	N039	2-(2-Amino-2-carboxyethyl)-5-oxotetrahydro-2-furancarboxylic acid	C8 H11 N O6					217.058	216.051	1.686		DDA for preferred ion	[M-H]-1	3	●	●	●	●	●	-2.66	0.450934	0.496395	0.482788	0.498115	0.508474	0.931464	0.842047	0.913349	0.880032	0.942427	0	1	0.487341	0.901864	4.57779	4.5408	1.85058	0.887977	4.27813e-08	3.80754e-07
524	N040	3-Deoxy-α-D-manno-octulosonate	C8 H14 O8					238.069	237.061	0.874		No MS2	[M-H]-1	3	●	●	●	●	●	-1.39	0.360865	0.371192	0.37509	0.365703	0.366277	0.434914	0.428507	0.435526	0.395253	0.400881	1	1	0.367825	0.419016	1.48576	4.6353	1.13917	0.187984	0.000468711	0.00180499
525	N041	G-5555	C25 H25 Cl N6 O3	91664373	G-5555			492.169	491.162	0.992		No MS2	[M-H]-1	3	●	●	●	●	●	3.38	0.590093	0.548581	0.606728	0.698578	0.658568	0.659085	0.66047	0.769945	0.628974	0.726564	1	1	0.62051	0.689008	9.47682	8.36114	1.11039	0.151066	0.0998405	0.194107
526	N042	CMPF	C12 H16 O5	123979	86879-39-2	HMDB0062776		240.099	239.092	8.288		No MS2	[M-H]-1	3	●	●	●	●	●	-1.27	0.24467	0.32333	0.355962	0.39983	0.391372	0.308578	0.288064	0.394441	0.295245	0.362992	0	1	0.343033	0.329864	18.3176	14.111	0.96161	-0.0564761	0.716286	0.807977
527	N043	SD 208	C17 H10 Cl F N6	10316032	627536-09-8,1608481-61-3			352.064	351.057	0.95		DDA for preferred ion	[M-H]-1	3	●	●	●	●	●	-0.11	1.10427	1.13245	1.0685	1.0548	0.993505	1.14348	1.14117	1.15276	1.08214	1.07614	1	1	1.07071	1.11914	4.9326	3.29075	1.04523	0.0638245	0.131079	0.240836
528	N044	N-3-oxo-butyryl-L-Homoserine lactone	C8 H11 N O4					185.068	184.061	5.922		DDA for preferred ion	[M-H]-1	3	●	●	●	●	●	-3.49	0.659147	0.72386	0.713924	0.701427	0.679063	0.740522	0.683849	0.705918	0.711076	0.726883	1	1	0.695484	0.71365	3.78414	3.0149	1.02612	0.0371981	0.266346	0.410523
529	N045	6-O-Galloylglucose	C13 H16 O10	128839	13186-19-1			332.074	331.067	5.127		DDA for preferred ion	[M-H]-1	3	●	●	●	●	●	-0.4	1.16513	1.20865	1.23454	1.22791	1.18414	0.165244	0.155947	0.155962	0.165709	0.141154	1	0	1.20407	0.156803	2.43226	6.35269	0.130227	-2.9409	1.03317e-12	5.17222e-11
530	N046	N-((3S,4R)-6-Cyano-3-hydroxy-2,2-dimethylchroman-4-yl)-N-hydroxyacetamide	C14 H16 N2 O4	121878	127408-31-5			276.111	275.104	6.868		DDA for preferred ion	[M-H]-1	3	●	●	●	●	●	-0.29	1.44445	1.50603	1.48304	1.58193	1.55868	1.33004	1.27324	1.35572	1.54852	1.47908	1	1	1.51483	1.39732	3.68536	8.09664	0.922429	-0.11649	0.0708193	0.145452
531	N047	2-Keto-6-acetamidocaproate	C8 H13 N O4	194080	59403-50-8			187.084	186.076	5.116		DDA for preferred ion	[M-H]-1	3	●	●	●	●	●	-3.67	0.604398	0.654844	0.711065	0.673034	0.655922	0.698111	0.65866	0.667296	0.681377	0.727074	1	1	0.659852	0.686504	5.82638	3.95659	1.04039	0.0571237	0.241137	0.389104
532	N048	Acetylcarnitine	C9 H17 N O4	7045767	3040-38-8	HMDB0000456		203.115	202.108	1.467		No MS2	[M-H]-1	3	●	●	●	●	●	-3.11	0.47336	0.51242	0.534034	0.526504	0.498646	0.333464	0.34911	0.3222	0.353739	0.359349	1	0	0.508993	0.343572	4.73375	4.46635	0.675005	-0.567031	1.19817e-06	7.32618e-06
533	N049	Indole-3-acetyl-L-aspartate	C14 H14 N2 O5					290.09	289.083	8.962		DDA for preferred ion	[M-H]-1	3	●	●	●	●	●	-0.57	1.41153	1.40037	1.01833	1.56691	2.96923	1.47969	1.30203	2.37353	1.34217	3.11034	1	1	1.67327	1.92155	44.949	41.4065	1.14838	0.199599	0.625789	0.749263
534	N050	5,9-Dihydroxy-2-(2-hydroxy-2-propanyl)-1-(1-hydroxy-3,5,6-trimethoxy-10-methyl-9-oxo-9,10-dihydro-2-acridinyl)-10-methoxy-11-methyl-1,11-dihydrofuro[2,3-c]acridin-6(2H)-one	C37 H36 N2 O11					684.232	683.225	0.878		No MS2	[M-H]-1	3	●	●	●	●	●	-0.09	0.195797	0.189527	0.222517	0.210105	0.194139	0.202277	0.213803	0.239848	0.192629	0.227013	1	1	0.202417	0.215114	6.72687	8.77551	1.06273	0.0877726	0.257276	0.404842
535	N051	JWH 398 N-pentanoic acid metabolite	C24 H20 Cl N O3					405.111	404.104	0.982		DDA for preferred ion	[M-H]-1	3	●	●	●	●	●	-4.17	0.830648	0.814541	0.739657	0.811747	0.873122	0.81128	0.837982	0.938084	0.958285	0.961725	1	1	0.813943	0.901471	5.92555	7.915	1.10754	0.147354	0.0526807	0.112838
536	N052	2,4-Dichlorotoluene	C7 H6 Cl2	7254	95-73-8			159.985	158.978	0.675		DDA for preferred ion	[M-H]-1	3	●	●	●	●	●	1.73	12.5592	13.7906	13.4856	12.9511	12.3959	0.999694	0.968171	1.0513	1.03687	1.07042	1	1	13.0365	1.02529	4.56367	4.01123	0.0786479	-3.66845	6.52487e-11	1.63325e-09
537	N053	Indole-3-acetyl-L-aspartate	C14 H14 N2 O5					290.09	289.083	9.059		DDA for preferred ion	[M-H]-1	3	●	●	●	●	●	-0.63	1.33958	1.72119	1.99353	1.418	1.60499	1.61333	1.53633	3.12295	1.58253	1.2961	1	1	1.61546	1.83024	16.0626	40.0683	1.13296	0.180093	0.554133	0.694453
538	N054	2,6-Anhydro-6-carboxy-3-deoxyhex-2-enonic acid	C7 H8 O7					204.026	203.019	1.91		DDA for preferred ion	[M-H]-1	3	●	●	●	●	●	-3.38	1.00143	1.06008	0.489736	1.01276	1.049	4.11462	3.70293	3.97103	3.90442	3.87193	0	1	0.922601	3.91299	26.3606	3.83144	4.24126	2.08449	1.1807e-08	1.18218e-07
539	N055	C16 (PKR inhibitor)	C13 H8 N4 O S					268.043	267.035	1.068		DDA for preferred ion	[M-H]-1	3	●	●	●	●	●	3.3	0.377785	0.328836	0.293725	0.334768	0.283002	0.243323	0.226326	0.208877	0.214907	0.183881	1	0	0.323623	0.215463	11.5915	10.2087	0.665783	-0.586876	0.00053364	0.0020452
540	N056	L-Proline, 4-hydroxy-5-oxo-4-(tetrahydro-2,3,4-trihydroxy-2-furanyl)-	C9 H13 N O8	71437684	41679-87-2	HMDB0029944		263.064	262.057	0.957		DDA for preferred ion	[M-H]-1	3	●	●	●	●	●	-0.48	0.948503	1.03528	0.952207	1.00281	1.02663	1.04266	1.08425	1.0843	0.981196	1.00032	1	0	0.993087	1.03854	4.10862	4.55452	1.04577	0.0645719	0.142344	0.257376
541	N057	BI-605906	C17 H22 F2 N4 O3 S2	23652660	960293-88-3			432.111	431.104	0.974		No MS2	[M-H]-1	3	●	●	●	●	●	2.14	0.249823	0.23444	0.219123	0.312758	0.250253	0.223961	0.260434	0.279998	0.283035	0.231162	1	0	0.25328	0.255718	14.0709	10.6549	1.00963	0.0138228	0.90626	0.929833
542	N058	alpha-D-Galactopyranosyl-(1->1)-beta-D-fructofuranosyl alpha-D-galactopyranosyl-(1->4)-[alpha-D-galactopyranosyl-(1->6)]-alpha-D-glucopyranoside	C30 H52 O26					828.274	873.272	1.181		DDA for preferred ion	[M+FA-H]-1	3	●	●	●	●	●	-1.02	0.61526	1.28073	1.51107	1.52776	1.58131	1.32687	1.28914	0.686946	1.63355	1.46158	1	1	1.30323	1.27962	30.8068	27.9581	0.981882	-0.0263778	0.924205	0.941842
543	N059	Oxalosuccinic acid	C6 H6 O7	972	1948-82-9	HMDB03974	C05379	190.011	189.003	1.007		No MS2	[M-H]-1	3	●	●	●	●	●	-3.6	0.259775	0.445861	0.240128	0.486377	0.538229	0.371295	0.222003	0.545615	0.794814	0.449926	1	1	0.394074	0.476731	34.4492	44.8228	1.20975	0.274708	0.486171	0.640499
544	N060	Inosine	C10 H12 N4 O5	135398641	58-63-9	HMDB00195	C00294	268.081	267.073	4.647		DDA for preferred ion	[M-H]-1	3	●	●	●	●	●	-0.59	0.487253	0.535746	0.528253	0.472377	0.466894	1.76709	1.34229	1.49577	1.65752	1.66714	1	1	0.498105	1.58596	6.41145	10.552	3.18399	1.67084	5.64583e-07	3.73744e-06
545	N061	L-Proline, 4-hydroxy-5-oxo-4-(tetrahydro-2,3,4-trihydroxy-2-furanyl)-	C9 H13 N O8	71437684	41679-87-2	HMDB0029944		263.064	262.057	1.039		No MS2	[M-H]-1	3	●	●	●	●	●	-0.93	0.342147	0.422883	0.359024	0.366562	0.329448	0.386738	0.37638	0.3787	0.396098	0.372421	1	0	0.364013	0.382067	9.87636	2.46714	1.0496	0.0698371	0.309025	0.460091
546	N062	PD180970	C21 H15 Cl2 F N4 O					428.06	427.053	0.85		DDA for preferred ion	[M-H]-1	3	●	●	●	●	●	-0.99	0.293496	0.349333	0.291044	0.286792	0.252993	0.298061	0.266777	0.297992	0.285152	0.273083	1	1	0.294732	0.284213	11.7554	5.00809	0.964312	-0.0524278	0.547559	0.69179
547	N063	5-Hydroxy-2-(4-hydroxyphenyl)-4-oxo-3,4-dihydro-2H-chromen-7-yl 2-O-(6-deoxyhexopyranosyl)hexopyranoside	C27 H32 O14					580.18	579.173	8.962		DDA for preferred ion	[M-H]-1	3	●	●	●	●	●	1.13	0.776788	0.968611	0.910361	0.875332	0.853089	0.861506	0.78377	0.832531	0.74775	1.04331	1	1	0.876836	0.853774	8.08891	13.4286	0.973699	-0.038452	0.71205	0.807977
548	N064	BAM7	C21 H19 N5 O2 S	3101542	331244-89-4			405.127	404.12	0.946		DDA for preferred ion	[M-H]-1	3	●	●	●	●	●	2.06	0.275497	0.285185	0.297486	0.274399	0.251686	0.265258	0.281249	0.321821	0.287974	0.301708	1	1	0.276851	0.291602	6.08822	7.3344	1.05328	0.0748931	0.260337	0.407423
549	N065	2,6-Anhydro-6-carboxy-3-deoxyhex-2-enonic acid	C7 H8 O7					204.026	203.019	1.671		DDA for preferred ion	[M-H]-1	3	●	●	●	●	●	-3.15	0.52842	0.579291	0.556212	0.591681	0.543582	0.713595	0.67007	0.842731	0.707574	0.613639	0	1	0.559837	0.709522	4.60354	11.8998	1.26737	0.34184	0.00530046	0.0154388
550	N066	asn-asp	C8 H13 N3 O6	25145403				247.082	246.074	0.817		DDA for preferred ion	[M-H]-1	3	●	●	●	●	●	4.73	0.202833	0.220147	0.211542	0.219564	0.191999	0.240653	0.256256	0.275831	0.268084	0.24697	1	0	0.209217	0.257559	5.70137	5.64081	1.23106	0.299902	0.000428779	0.00166724
551	N067	GSK269962	C29 H30 N8 O5	16095342	850664-21-0			570.232	569.225	9.346		DDA for preferred ion	[M-H]-1	3	●	●	●	●	●	-2.97	0.973044	1.05661	1.31174	0.961988	0.772833	1.93195	1.73881	0.849935	1.55978	0.852546	1	1	1.01524	1.3866	19.2641	36.5014	1.36578	0.449729	0.164455	0.286366
552	N068	R59949	C28 H25 F2 N3 O S	657356	120166-69-0			489.169	488.161	0.876		DDA for preferred ion	[M-H]-1	3	●	●	●	●	●	0.15	0.352943	0.421008	0.371656	0.38481	0.374703	0.319324	0.248545	0.361234	0.353332	0.397402	1	0	0.381024	0.335967	6.59961	16.7279	0.881748	-0.181561	0.1404	0.256174
553	N069	N-[1-(1,3-Benzodioxol-5-yl)-1-oxo-2-propanyl]-N-methylacetamide	C13 H15 N O4					249.1	248.092	9.107		DDA for preferred ion	[M-H]-1	3	●	●	●	●	●	-1.5	3.21591	3.62475	3.59968	3.93542	2.79625	2.14823	3.4379	3.64178	3.74477	3.72346	1	1	3.4344	3.33923	12.7712	20.266	0.972288	-0.040545	0.798528	0.863186
554	N070	5-Hydroxy-2-(4-hydroxyphenyl)-4-oxo-3,4-dihydro-2H-chromen-7-yl 2-O-(6-deoxyhexopyranosyl)hexopyranoside	C27 H32 O14					580.18	579.173	9.063		No MS2	[M-H]-1	3	●	●	●	●	●	1.23	0.647723	0.768768	0.751159	0.794388	0.745063	0.843894	0.738118	0.886607	0.880578	0.713622	1	1	0.74142	0.812564	7.52194	10.0021	1.09596	0.132189	0.145206	0.261959
555	N071	fructosylglycine	C8 H15 N O7	3081391	4429-05-4			237.085	236.077	0.956		DDA for preferred ion	[M-H]-1	3	●	●	●	●	●	-1.42	0.378649	0.384234	0.358921	0.392983	0.355434	0.144941	0.154955	0.155771	0.139635	0.136464	1	0	0.374044	0.146353	4.34952	5.99184	0.391272	-1.35375	3.25213e-09	3.9469e-08
556	N072	AZ82	C28 H31 F3 N4 O3 S	91885438	1449578-65-7			560.206	559.199	1.013		DDA for preferred ion	[M-H]-1	3	●	●	●	●	●	-1.9	0.448946	0.447631	0.441553	0.515907	0.478096	0.493983	0.476716	0.538713	0.516932	0.554933	1	0	0.466427	0.516255	6.6618	6.17132	1.10683	0.146434	0.0367332	0.0833522
557	N073	Mitoxantrone	C22 H28 N4 O6	4212	65271-80-9	HMDB15335	C11195	444.199	443.192	6.626		DDA for preferred ion	[M-H]-1	3	●	●	●	●	●	-4.14	1.28762	1.38674	1.38264	1.45161	1.39491	1.42218	1.4038	1.37247	1.45519	1.41268	1	1	1.3807	1.41326	4.27469	2.12035	1.02358	0.0336277	0.30335	0.454174
558	N074	PC(o-16:1(9Z)/22:0)	C46 H92 N O7 P					801.658	800.65	0.746		No MS2	[M-H]-1	3	●	●	●	●	●	-4.41	0.174848	0.172944	0.167801	0.146807	0.128764	0.236464	0.19942	0.19379	0.206454	0.215705	1	1	0.158233	0.210366	12.5724	7.95252	1.32947	0.410856	0.00204262	0.00654454
559	N075	BMS 986188	C30 H31 Br O4	118737394	BMS-986188			534.143	533.135	0.981		No MS2	[M-H]-1	3	●	●	●	●	●	3.92	0.500219	0.523618	0.484465	0.512751	0.489107	0.449459	0.51009	0.527808	0.513681	0.48853	1	1	0.502032	0.497914	3.24231	6.13005	0.991797	-0.0118836	0.796806	0.862489
560	N076	13-Isopropyl-3,7,15-trimethyl-14,16-dioxahexacyclo[7.6.1.0~2,13~.0~3,11~.0~4,8~.0~10,15~]hexadecane-1,4,8,9,10,11-hexol	C20 H30 O8					398.194	397.186	7.619		DDA for preferred ion	[M-H]-1	3	●	●	●	●	●	-1.14	0.0361033	0.0376768	0.0388602	0.0416312	0.0393921	0.384319	0.434726	0.726228	0.746125	0.760994	1	1	0.0387327	0.610478	5.30389	30.2587	15.7613	3.97832	0.000121975	0.000536824
561	N077	1228222	C13 H14 N2 O4					262.095	261.088	7.324		DDA for preferred ion	[M-H]-1	3	●	●	●	●	●	-0.91	2.02736	2.27999	2.20918	2.29806	1.77848	2.09531	1.97656	2.22504	2.20317	2.22199	1	1	2.11861	2.14441	10.2998	5.031	1.01218	0.0174636	0.818608	0.871948
562	N078	ManNaz	C16 H22 N4 O10	20591219	361154-23-6			430.132	429.124	1.011		DDA for preferred ion	[M-H]-1	3	●	●	●	●	●	-4.55	0.0661309	0.0618852	0.0438967	0.0426944	0.0465027	0.163388	0.181568	0.17835	0.135048	0.192047	1	1	0.052222	0.17008	20.9687	12.9982	3.25687	1.70349	5.17511e-06	2.8588e-05
563	N079	Ac-PAL-AMC	C26 H34 N4 O6	137700547	1431362-79-6			498.246	497.239	11.716		DDA for preferred ion	[M-H]-1	3	●	●	●	●	●	-3.14	1.53329	1.74079	1.90028	1.11463	1.92486	1.677	1.6154	0.976652	1.77372	1.84685	1	1	1.64277	1.57792	20.3359	22.0313	0.960526	-0.0581038	0.771272	0.846287
564	N080	AMG 232	C28 H35 Cl2 N O5 S	58573469				567.164	566.157	1.318		DDA for preferred ion	[M-H]-1	3	●	●	●	●	●	4.54	0.440691	0.45172	0.436507	0.474637	0.481462	0.512174	0.488222	0.515283	0.513594	0.495026	1	1	0.457003	0.50486	4.40809	2.44995	1.10472	0.143678	0.00193248	0.00624159
565	N081	fenvalerate	C25 H22 Cl N O3	3347	51630-58-1	HMDB0031791	C10988	419.127	418.12	0.897		DDA for preferred ion	[M-H]-1	3	●	●	●	●	●	-3.83	0.244452	0.261831	0.263432	0.254991	0.276025	0.295794	0.277832	0.299797	0.274184	0.299513	1	1	0.260146	0.289424	4.46077	4.28975	1.11254	0.153864	0.00486159	0.0143167
566	N082	2-C-Methyl-D-erythritol 4-phosphate	C5 H13 O7 P	443198	206440-72-4			216.039	215.032	0.82		No MS2	[M-H]-1	3	●	●	●	●	●	-1.89	1.12715	1.285	1.23596	1.6431	1.48684	0.662801	0.664132	0.733841	0.686237	0.647184	1	1	1.35561	0.678839	15.2686	4.97129	0.500763	-0.9978	9.10204e-05	0.000411906
567	N083	N-((3S,4R)-6-Cyano-3-hydroxy-2,2-dimethylchroman-4-yl)-N-hydroxyacetamide	C14 H16 N2 O4	121878	127408-31-5			276.111	275.104	6.321		DDA for preferred ion	[M-H]-1	3	●	●	●	●	●	-0.12	3.64735	4.13376	4.12853	4.39641	4.3371	4.21963	4.13607	4.20965	4.11813	4.22836	1	1	4.12863	4.18237	7.13216	1.22609	1.01302	0.0186567	0.698195	0.798935
568	N084	Acetylblasticidin S	C19 H28 N8 O6					464.211	463.204	2.175		DDA for preferred ion	[M-H]-1	3	●	●	●	●	●	-3.8	0.707881	0.79282	0.754908	0.795466	0.728542	0.903479	0.446702	0.882379	0.94991	0.913206	1	1	0.755924	0.819135	5.11656	25.5911	1.08362	0.115861	0.525918	0.671234
569	N085	bifurcose	C24 H42 O21					666.221	711.219	1.171		DDA for preferred ion	[M+FA-H]-1	3	●	●	●	●	●	-1.25	2.7535	2.7931	2.9104	3.11374	3.018	2.92462	2.88668	3.26945	3.29956	3.21494	1	1	2.91775	3.11905	5.17033	6.33562	1.06899	0.0962508	0.107802	0.205706
570	N086	(S)-N-Boc-L-homoserine ethyl ester	C11 H21 N O5	29974661	147325-09-5			247.142	246.134	1.476		DDA for preferred ion	[M-H]-1	3	●	●	●	●	●	-1.48	0.531893	0.617119	0.609668	0.619356	0.585842	0.69693	0.676314	0.752963	0.716888	0.801523	1	1	0.592776	0.728923	6.1634	6.78519	1.22968	0.298281	0.00111947	0.00393289
571	N087	D-gamma-Glutamyl-D-gamma-glutamyl-D-gamma-glutamyl-5-oxo-D-norvaline	C20 H30 N4 O12					518.184	563.182	0.869		DDA for preferred ion	[M+FA-H]-1	3	●	●	●	●	●	-4.25	6.6304	7.51259	6.97071	7.39886	7.4431	6.54172	7.20001	7.98942	7.06581	7.56096	1	1	7.19113	7.27159	5.26312	7.4668	1.01119	0.0160506	0.792655	0.86032
572	N088	Inulin	C17 H30 O16	24763				490.153	489.146	0.994		DDA for preferred ion	[M-H]-1	3	●	●	●	●	●	-1.05	1.30443	1.51648	1.52993	1.56993	1.50042	1.40676	1.39519	1.53486	1.56746	1.69042	1	1	1.48424	1.51894	6.99086	8.05715	1.02338	0.0333391	0.64165	0.758055
573	N089	mk-3903	C27 H19 Cl N2 O3	45256689	1219737-12-8			454.11	453.103	0.889		DDA for preferred ion	[M-H]-1	3	●	●	●	●	●	3.67	1.71787	1.85263	2.06205	1.93203	2.02494	1.63136	1.77089	1.95225	1.80481	1.99739	1	1	1.9179	1.83134	7.22034	8.03185	0.954865	-0.0666318	0.366043	0.51986
574	N090	samatasvir	C47 H48 N8 O6 S2					884.311	883.304	1.019		DDA for preferred ion	[M-H]-1	3	●	●	●	●	●	-2.89	0.15231	0.156757	0.143789	0.160409	0.170192	0.182365	0.167429	0.186269	0.182011	0.178435	1	1	0.156691	0.179302	6.23485	4.01195	1.1443	0.194462	0.00313384	0.0097488
575	N091	N-Hydroxy-4-({isopropyl[(2,3,4,5-tetrafluorophenyl)sulfonyl]amino}methyl)benzamide	C17 H16 F4 N2 O4 S					420.075	419.067	0.845		DDA for preferred ion	[M-H]-1	3	●	●	●	●	●	-4.98	8.71076	8.87655	7.68923	7.54421	6.72198	6.16069	6.00203	6.41717	5.76282	5.67841	1	1	7.90854	6.00422	11.2554	4.99258	0.759207	-0.397434	0.00191531	0.00621119
576	N092	1,4,5-Trihydroxy-5-hydroxymethyl-2-methoxycyclohex-1-en-3-one	C8 H12 O6	195955	76663-30-4	HMDB41031		204.063	203.056	5.982		DDA for preferred ion	[M-H]-1	3	●	●	●	●	●	-2.79	0.507422	0.56843	0.593363	0.557544	0.522652	0.578447	0.542245	0.545081	0.54519	0.560229	1	1	0.549882	0.554238	6.32432	2.75342	1.00792	0.0113834	0.804057	0.865658
577	N093	(2S)-2-{[(2-Oxo-2,3-dihydro-1H-indol-3-yl)acetyl]amino}succinate	C14 H12 N2 O6					304.069	303.062	6.687		DDA for preferred ion	[M-H]-1	3	●	●	●	●	●	-0.73	22.8681	25.5403	14.9915	24.8251	24.2183	24.6231	24.6587	24.654	25.4182	25.5199	1	1	22.4887	24.9748	19.1407	1.81319	1.11055	0.151275	0.234947	0.384066
578	N094	alpha-D-Galactopyranosyl-(1->1)-beta-D-fructofuranosyl alpha-D-galactopyranosyl-(1->4)-[alpha-D-galactopyranosyl-(1->6)]-alpha-D-glucopyranoside	C30 H52 O26					828.274	873.272	0.98		DDA for preferred ion	[M+FA-H]-1	3	●	●	●	●	●	-1.16	4.90125	4.57235	4.17985	5.2079	4.9994	4.89369	5.90906	6.16714	5.37267	5.22329	1	1	4.77215	5.51317	8.44025	9.38972	1.15528	0.208243	0.0354632	0.0818801
579	N095	D-Glucopyranose	C6 H12 O6	5793	2280-44-6,54-17-1			180.063	225.061	0.796		DDA for other ion	[M+FA-H]-1	3	●	●	●	●	●	-2.97	2.87835	3.04247	5.75871	5.829	3.10934	3.75054	3.82349	4.19629	4.15735	4.06877	0	1	4.12358	3.99929	37.0374	5.02274	0.969859	-0.0441531	0.861312	0.903024
580	N096	(1S,2S,3R,4S,5R,6S)-2,3,4,6-Tetrahydroxy-5-methoxycyclohexyl alpha-D-galactopyranosyl-(1->6)-alpha-D-galactopyranosyl-(1->6)-alpha-D-galactopyranoside	C25 H44 O21					680.237	725.235	0.869		DDA for preferred ion	[M+FA-H]-1	3	●	●	●	●	●	-1.21	2.42273	2.72729	2.48441	2.75044	2.71548	2.28039	2.65981	2.93533	2.59933	2.74339	1	1	2.62007	2.64365	5.88022	9.05482	1.009	0.0129266	0.857659	0.900374
581	N097	Apiin	C26 H28 O14	5280746	26544-34-3	HMDB0030843	C04858	564.147	563.14	7.962		DDA for preferred ion	[M-H]-1	3	●	●	●	●	●	-1.17	1.36726	1.45776	1.38792	1.46895	1.4324	1.59171	1.45196	1.50179	1.55531	1.55459	1	1	1.42286	1.53107	3.09273	3.56757	1.07605	0.105748	0.00869925	0.0240559
582	N098	L-Alanyl-3-{[(2E)-4-amino-4-oxo-2-butenoyl]amino}-L-alanine	C10 H16 N4 O5	6439822				272.112	271.105	0.875		DDA for preferred ion	[M-H]-1	3	●	●	●	●	●	-0.65	0.399399	0.404117	0.409924	0.41447	0.413335	0.386868	0.41894	0.482629	0.40456	0.456501	1	1	0.408249	0.429899	1.56249	9.08524	1.05303	0.0745498	0.256025	0.40449
583	N099	Pyrintegrin	C23 H25 N5 O3 S					451.169	450.161	7.496		DDA for preferred ion	[M-H]-1	3	●	●	●	●	●	1.57	1.61816	1.77066	1.6491	1.34904	1.29961	0.0115308	0.0102264	0.0113684	0.00589437	0.0113581	1	0	1.53731	0.0100756	13.2289	23.7677	0.00655404	-7.2534	1.6027e-07	1.23439e-06
584	N100	3-Methoxy-4-hydroxyphenylglycol glucuronide	C15 H20 O10	22833525	52002-41-2	HMDB0000496	C03033	360.106	359.098	6.028		DDA for preferred ion	[M-H]-1	3	●	●	●	●	●	-0.29	0.860282	0.940822	1.03616	0.914645	0.995316	0.004649	0.00522532	0.00481821	0.00423664	0.00273642	1	0	0.949446	0.00433312	7.23218	22.1654	0.00456384	-7.77554	1.35074e-09	1.92686e-08
585	N101	(R)-Mevalonate diphosphate	C6 H14 O10 P2	24916915				308.005	306.998	0.831		DDA for preferred ion	[M-H]-1	3	●	●	●	●	●	-4.11	4.09096	4.15564	3.90418	4.21484	3.83262	3.4535	3.43029	3.58987	3.34157	3.27825	1	1	4.03965	3.4187	4.06742	3.47087	0.846285	-0.240784	0.000130881	0.000572873
586	N102	{2-[(2E)-5-Hydroxy-2-penten-1-yl]-3-oxocyclopentyl}acetic acid	C12 H18 O4					226.12	225.113	8.203		DDA for preferred ion	[M-H]-1	3	●	●	●	●	●	-2.09	0.156774	0.15507	0.161837	0.23928	0.243936	15.1406	14.4609	15.0369	15.3624	15.3592	0	1	0.19138	15.072	24.0094	2.45167	78.7544	6.29929	2.74447e-13	3.14089e-11
587	N103	4-(γ-L-Glutamylamino)butanoate	C9 H16 N2 O5					232.105	231.098	2.162		DDA for preferred ion	[M-H]-1	3	●	●	●	●	●	-2.15	19.2723	20.9241	20.3284	21.0199	19.8813	21.3677	20.1785	21.1373	21.9328	21.4625	1	1	20.2852	21.2158	3.60485	3.05488	1.04587	0.0647082	0.0658466	0.13664
588	N104	Diphosphate	H4 O7 P2	644102				177.942	176.935	0.81		No MS2	[M-H]-1	3	●	●	●	●	●	-4.59	3.69388	3.87734	4.05259	4.23261	4.11623	3.51034	3.67917	3.91914	3.69922	3.72578	1	1	3.99453	3.70673	5.29562	3.92957	0.927951	-0.107879	0.0366171	0.0833522
589	N105	5,9-Dihydroxy-2-(2-hydroxy-2-propanyl)-1-(1-hydroxy-3,5,6-trimethoxy-10-methyl-9-oxo-9,10-dihydro-2-acridinyl)-10-methoxy-11-methyl-1,11-dihydrofuro[2,3-c]acridin-6(2H)-one	C37 H36 N2 O11					684.232	683.224	0.986		DDA for preferred ion	[M-H]-1	3	●	●	●	●	●	-0.29	3.97777	4.31422	4.51557	4.57807	4.07189	4.41036	4.58152	4.77804	4.44475	4.21174	1	1	4.2915	4.48528	6.15963	4.6906	1.04515	0.0637154	0.235561	0.384286
590	N106	1-O-Arsonopentofuranose	C5 H11 As O8					273.966	272.959	0.677		DDA for preferred ion	[M-H]-1	3	●	●	●	●	●	-3.44	5.59479	6.49067	6.33188	5.94734	5.7259	0.067138	0.0719184	0.082773	0.084571	0.0906697	1	0	6.01812	0.079414	6.38905	12.1346	0.0131958	-6.24377	5.41515e-10	1.08438e-08
591	N107	3-Deoxy-D-glycero-D-galacto-non-2-ulopyranosonate	C9 H16 O9	146037308				268.079	267.072	0.951		DDA for preferred ion	[M-H]-1	3	●	●	●	●	●	-0.98	3.88099	4.09085	3.95494	3.8806	3.70344	3.99903	4.10039	4.30978	3.75713	3.78434	1	1	3.90216	3.99014	3.5967	5.7568	1.02254	0.0321637	0.485772	0.640499
592	N108	D-myo-Inositol (1,4,5)-trisphosphate	C6 H15 O15 P3					419.962	418.954	1.067		DDA for preferred ion	[M-H]-1	3	●	●	●	●	●	-1.43	2.31982	2.06491	2.16578	2.06019	1.97688	0.224834	0.0971705	0.119908	0.144358	0.100685	1	0	2.11751	0.137391	6.20655	38.1089	0.0648832	-3.94601	1.18141e-09	1.85551e-08
593	N109	nicotianamine	C12 H21 N3 O6	9882882	34441-14-0			303.143	302.136	0.778		No MS2	[M-H]-1	3	●	●	●	●	●	-0.4	0.361518	0.410687	0.353725	0.393397	0.385181	0.393223	0.389765	0.407439	0.385204	0.405568	1	1	0.380902	0.39624	6.12316	2.47679	1.04027	0.0569564	0.212303	0.352811
594	N110	glu-ser	C8 H14 N2 O6	6995653	5875-38-7	HMDB28828		234.085	233.078	0.907		DDA for preferred ion	[M-H]-1	3	●	●	●	●	●	-1.68	1.44575	1.55208	1.49675	1.53521	1.62319	1.50061	1.48329	1.58073	1.59793	1.64334	1	1	1.5306	1.56118	4.30914	4.32289	1.01998	0.0285441	0.489266	0.641411
595	N111	2-methylcitric acid	C7 H10 O7	515	6061-96-7	HMDB0003610		206.042	205.035	0.997		No MS2	[M-H]-1	3	●	●	●	●	●	-3.09	0.335821	0.345071	0.301804	0.320241	0.315053	0.325576	0.296457	0.300943	0.25553	0.188916	1	0	0.323598	0.273484	5.2845	19.5798	0.845136	-0.242744	0.0813339	0.16432
596	N112	(1R,6R)-6-Hydroxy-2-succinylcyclohexa-2,4-diene-1-carboxylate	C11 H12 O6	5287432				240.063	239.056	7.112		DDA for preferred ion	[M-H]-1	3	●	●	●	●	●	-1.29	2.62503	3.14175	3.02526	3.08692	1.5825	2.86704	2.7817	2.83138	2.93584	3.01596	1	1	2.69229	2.88639	24.2484	3.17506	1.07209	0.100429	0.528802	0.672334
597	N113	2-Hydroxy-5-[3-(4-methoxy-1-benzofuran-5-yl)-3-oxopropanoyl]phenyl hydrogen sulfate	C18 H14 O9 S					406.035	405.028	1.786		DDA for preferred ion	[M-H]-1	3	●	●	●	●	●	-0.99	0.936469	0.987982	0.944622	0.953469	0.906099	0.0169387	0.0182484	0.0170804	0.0188487	0.0175987	1	0	0.945728	0.017743	3.12902	4.53054	0.0187612	-5.73611	1.91047e-12	8.05412e-11
598	N114	(2S,4S)-4-Hydroxy-2,3,4,5-tetrahydrodipicolinate	C7 H9 N O5	70678847				187.047	186.04	1.913		DDA for preferred ion	[M-H]-1	3	●	●	●	●	●	-4.29	0.152771	0.193449	0.16887	0.190724	0.184335	0.653295	0.568165	0.622328	0.59404	0.634255	1	1	0.17803	0.614417	9.56774	5.47243	3.4512	1.7871	5.31861e-09	5.91695e-08
599	N115	4-(γ-L-Glutamylamino)butanoate	C9 H16 N2 O5					232.105	231.098	1.657		DDA for preferred ion	[M-H]-1	3	●	●	●	●	●	-2.03	4.63943	4.95382	4.82721	4.98486	4.80024	6.70114	4.48108	6.75193	6.81355	6.75446	1	1	4.84111	6.30043	2.84548	16.1549	1.30144	0.380113	0.0130557	0.0341753
600	N116	5'-Phosphoribosyl-4-(N-succinocarboxamide)-5-aminoimidazole	C13 H19 N4 O12 P	160666	3031-95-6	HMDB0000797	C04823	454.074	453.066	0.812		DDA for preferred ion	[M-H]-1	3	●	●	●	●	●	0.12	0.295017	0.362838	0.30495	0.4133	0.352893	0.320689	0.333079	0.35839	0.388512	0.406026	1	1	0.345799	0.361339	13.8269	9.97352	1.04494	0.0634186	0.577651	0.711218
601	N117	(+)-castanospermine	C8 H15 N O4					189.099	188.092	0.988		DDA for preferred ion	[M-H]-1	3	●	●	●	●	●	-3.65	0.492801	0.531239	0.507672	0.4816	0.474942	0.492821	0.56642	0.582928	0.543471	0.551047	1	1	0.497651	0.547338	4.5217	6.21695	1.09984	0.137298	0.0261088	0.0628022
602	N118	MFCD00930300	C17 H12 F4 N2 O2 S					384.054	383.046	0.927		DDA for preferred ion	[M-H]-1	3	●	●	●	●	●	-4.84	0.314269	0.35992	0.272809	0.268748	0.296511	0.180647	0.194938	0.197754	0.194741	0.17501	1	0	0.302451	0.188618	12.2514	5.36508	0.623631	-0.681235	0.000164754	0.000708399
603	N119	Traumatic Acid	C12 H20 O4	5283028	6402-36-4	HMDB00933	C16308	228.136	227.128	8.521		DDA for preferred ion	[M-H]-1	3	●	●	●	●	●	-2	0.0582305	0.0629059	0.0611729	0.0916434	0.10071	5.26088	5.08598	5.31935	5.3974	5.45963	0	1	0.0749326	5.30465	26.3269	2.70845	70.7922	6.14552	6.23834e-13	3.61149e-11
604	N120	Methyl (4xi)-4-O-D-glucopyranosyl-beta-D-xylo-hexopyranoside	C13 H24 O11					356.131	401.13	0.896		DDA for preferred ion	[M+FA-H]-1	3	●	●	●	●	●	-1.44	22.429	24.3997	25.0897	24.9655	26.3478	22.8069	24.2196	26.3491	23.8697	27.0864	1	1	24.6464	24.8663	5.79895	7.18834	1.00892	0.0128186	0.835213	0.884928
605	N121	Galactitol	C6 H14 O6	11850	608-66-2	HMDB00107	C01697	182.078	181.071	0.862		No MS2	[M-H]-1	3	●	●	●	●	●	-3.75	0.437011	0.447779	0.442065	0.522638	0.472101	0.0891008	0.0703493	0.0926623	0.106955	0.0804212	1	0	0.464319	0.0878978	7.59636	15.5907	0.189305	-2.40122	1.7639e-08	1.64288e-07
606	N122	7-Methoxy-6-{(E)-2-[2-(7-methoxy-2-oxo-2H-chromen-6-yl)-1,4-dimethyl-3-cyclohexen-1-yl]vinyl}-2H-chromen-2-one	C30 H28 O6					484.19	483.183	0.981		No MS2	[M-H]-1	3	●	●	●	●	●	2.85	0.310207	0.291491	0.284121	0.254916	0.223931	0.316759	0.320348	0.320036	0.29593	0.274041	1	1	0.272933	0.305423	12.4043	6.62911	1.11904	0.162259	0.102786	0.198869
607	N123	(2S)-1-[(2S,3S)-3-Carboxylato-3-{[(3S)-3-carboxylato-3-hydroxypropyl]ammonio}-2-hydroxypropyl]-2-azetidinecarboxylate	C12 H18 N2 O8					318.106	317.099	4.934		DDA for preferred ion	[M-H]-1	3	●	●	●	●	●	-0.64	0.457199	0.530167	0.510457	0.545852	0.528454	0.520448	0.510511	0.522642	0.540156	0.551108	1	1	0.514426	0.528973	6.67956	3.08991	1.02828	0.0402315	0.417482	0.574338
608	N124	BETP	C20 H17 F3 N2 O2 S					406.095	405.088	0.853		DDA for preferred ion	[M-H]-1	3	●	●	●	●	●	-2.12	0.411012	0.460145	0.369289	0.444431	0.401304	0.201497	0.211969	0.216162	0.221697	0.192975	1	0	0.417236	0.20886	8.61841	5.53381	0.50058	-0.998328	1.73651e-06	1.04582e-05
609	N125	beta-D-Fructofuranosyl alpha-D-galactopyranosyl-(1->4)-[alpha-D-galactopyranosyl-(1->6)]-alpha-D-glucopyranoside	C24 H42 O21					666.221	711.219	0.996		DDA for preferred ion	[M+FA-H]-1	3	●	●	●	●	●	-1.31	9.69323	8.70011	9.16954	9.92901	9.25728	11.1888	12.3915	12.886	9.31483	10.7447	1	1	9.34984	11.3052	5.11977	12.4846	1.20913	0.273969	0.0188918	0.0477361
610	N126	alpha-Methyl D-mannoside	C7 H14 O6					194.079	239.077	0.872		DDA for other ion	[M+FA-H]-1	3	●	●	●	●	●	-2.43	10.8911	11.3297	11.2802	11.514	11.4087	12.3354	11.8653	13.0907	12.2621	12.7472	1	1	11.2847	12.4601	2.1013	3.78256	1.10416	0.142948	0.00107734	0.00381837
611	N127	N-[(2S)-2-Hydroxypropanoyl]-L-leucine	C9 H17 N O4					203.115	202.108	1.062		DDA for preferred ion	[M-H]-1	3	●	●	●	●	●	-3.36	0.613061	0.598097	0.664264	0.615843	0.641279	0.71915	0.660407	0.710323	0.662448	0.67769	1	1	0.626509	0.686004	4.18164	3.97163	1.09496	0.130881	0.00785015	0.022219
612	N128	N-(3,4,5-Trihydroxybenzoyl)glycine	C9 H9 N O6	53717071				227.043	226.035	5.552		DDA for preferred ion	[M-H]-1	3	●	●	●	●	●	-1.97	0.460963	0.539066	0.506082	0.530562	0.523252	0.492646	0.462497	0.486472	0.490328	0.512974	0	1	0.511985	0.488983	6.05444	3.68483	0.955073	-0.0663163	0.189337	0.322679
613	N129	Unknown_N001	C6 H15 O18 P S					437.973	436.966	0.808		No MS2	[M-H]-1	4	●	●	●	●	●	2.72	0.378554	0.359564	0.351314	0.396121	0.357432	0.142962	0.162022	0.173572	0.183509	0.16339	1	1	0.368597	0.165091	5.00556	9.15225	0.44789	-1.15878	5.89258e-08	5.13039e-07
614	N130	Unknown_N002	C18 H34 O17					522.179	521.172	0.987		No MS2	[M-H]-1	4	●	●	●	●	●	-1.2	1.23887	1.19352	1.25287	1.32759	1.20502	1.36231	1.4282	1.54072	1.31271	1.41098	1	1	1.24357	1.41099	4.24718	6.05064	1.13462	0.182212	0.00579702	0.0167632
615	N131	Unknown_N003	C23 H39 O13 P3					616.161	615.153	0.859		DDA for preferred ion	[M-H]-1	4	●	●	●	●	●	0.28	2.22366	2.39224	2.26407	2.38315	2.26287	2.16297	2.21868	2.54115	2.38747	2.32433	1	1	2.3052	2.32692	3.34505	6.3802	1.00942	0.0135312	0.778935	0.851064
616	N132	Unknown_N004	C22 H37 O13 P3					602.146	601.138	0.81		DDA for preferred ion	[M-H]-1	4	●	●	●	●	●	1.37	1.55542	1.71157	1.58355	1.91835	1.72029	1.60502	1.61915	1.86484	1.80829	1.80196	1	1	1.69784	1.73985	8.46717	6.85563	1.02475	0.0352654	0.62857	0.750349
617	N133	Unknown_N005	C9 H14 N2 O4 P2 S					308.014	307.007	0.832		DDA for preferred ion	[M-H]-1	4	●	●	●	●	●	-2.94	2.18661	2.11122	2.0988	2.13627	1.98864	1.78085	1.74176	1.87297	1.77972	1.62347	1	1	2.10431	1.75975	3.46376	5.12701	0.836262	-0.257973	0.000162047	0.000701619
618	N134	Unknown_N006	C37 H47 N6 O15 P					846.284	845.277	0.997		DDA for preferred ion	[M-H]-1	4	●	●	●	●	●	0.83	1.41534	1.59917	1.48982	1.57362	1.52812	1.48197	1.40189	1.49887	1.58532	1.58141	1	1	1.52121	1.50989	4.77058	5.06246	0.992559	-0.0107758	0.816252	0.871757
619	N135	Unknown_N007	C12 H18 O5					242.115	241.108	9.571		DDA for preferred ion	[M-H]-1	4	●	●	●	●	●	-1.34	0.233064	0.594524	0.593323	0.621666	0.598521	3.38804	2.89812	3.23828	3.02011	3.2439	1	1	0.52822	3.15769	31.3124	6.19961	5.97799	2.57966	1.38212e-08	1.35009e-07
620	N136	Unknown_N008	C31 H44 N2 O17 P2					778.212	777.205	0.856		DDA for preferred ion	[M-H]-1	4	●	●	●	●	●	0.97	1.39079	1.56648	1.47239	1.57769	1.45876	1.32625	1.43479	1.57996	1.52351	1.50108	1	1	1.49322	1.47312	5.25359	6.59692	0.986536	-0.0195557	0.728208	0.814657
621	N137	Unknown_N009	C6 H15 O10 P					278.04	277.033	0.808		DDA for preferred ion	[M-H]-1	4	●	●	●	●	●	-1.06	2.4487	2.61014	2.65954	2.78202	2.6299	1.28136	1.30189	1.38444	1.36477	1.32687	1	1	2.62606	1.33186	4.55252	3.21225	0.507172	-0.979454	1.45622e-08	1.40534e-07
622	N138	Unknown_N010	C22 H29 N5 O11					539.184	538.177	0.922		DDA for preferred ion	[M-H]-1	4	●	●	●	●	●	-3.81	0.877852	0.866207	0.811805	0.819568	0.97275	0.805527	0.838693	1.10677	1.03396	0.944982	1	1	0.869637	0.945986	7.39947	13.4579	1.08779	0.121406	0.265643	0.410523
623	N139	Unknown_N011	C6 H16 O13 P2					358.007	356.999	0.803		DDA for preferred ion	[M-H]-1	4	●	●	●	●	●	-0.3	2.1803	2.31835	2.36696	2.59223	2.44353	2.20808	2.24378	2.57624	2.24368	2.39473	1	1	2.38027	2.3333	6.40354	6.5881	0.980266	-0.0287543	0.640552	0.758055
624	N140	Unknown_N012	C17 H26 N4 O11					462.158	461.151	0.921		DDA for preferred ion	[M-H]-1	4	●	●	●	●	●	-3.94	1.08547	1.06256	1.06703	1.04906	1.17776	1.0215	1.00588	1.27047	1.21112	1.14137	1	1	1.08838	1.13007	4.74464	10.2454	1.03831	0.0542325	0.483113	0.640499
625	N141	Unknown_N013	C20 H30 N4 O15					566.169	565.161	0.998		DDA for preferred ion	[M-H]-1	4	●	●	●	●	●	-3.6	0.491925	0.487556	0.457824	0.481317	0.494357	0.61063	0.590775	0.648484	0.551154	0.648793	1	1	0.482596	0.609967	3.04762	6.76884	1.26393	0.337916	0.00018846	0.000794509
626	N142	Unknown_N014	C9 H15 Cl N10 O5					378.092	377.085	0.818		DDA for preferred ion	[M-H]-1	4	●	●	●	●	●	2.36	0.669321	0.808303	0.736549	1.02862	0.951223	0.745346	0.682647	0.781569	0.801206	0.754477	1	1	0.838803	0.753049	17.7609	5.99422	0.897766	-0.155589	0.252998	0.402885
627	N143	Unknown_N015	C22 H27 N5 O9					505.179	504.172	8.643		DDA for preferred ion	[M-H]-1	4	●	●	●	●	●	-3.47	1.04733	1.22722	1.13748	1.18497	1.17414	0.731961	0.694439	0.757	0.799588	0.750337	1	1	1.15423	0.746665	5.87249	5.12834	0.646896	-0.628394	2.58883e-06	1.49184e-05
628	N144	Unknown_N016	C28 H47 O18 P3					764.197	763.19	0.815		DDA for preferred ion	[M-H]-1	4	●	●	●	●	●	-0.19	0.719852	0.839835	0.753233	0.855649	0.793107	0.741237	0.73675	0.81701	0.807441	0.81461	1	1	0.792335	0.78341	7.2084	5.19904	0.988735	-0.0163437	0.783251	0.852424
629	N145	Unknown_N017	C10 H15 N3 O6					273.096	272.089	1.67		DDA for preferred ion	[M-H]-1	4	●	●	●	●	●	-0.86	1.70313	2.12274	1.9257	1.81144	1.75573	3.3374	3.09989	3.18795	2.35708	2.15954	1	1	1.86375	2.82837	8.94278	18.8052	1.51757	0.601766	0.00474267	0.014018
630	N146	Unknown_N018	C13 H19 Cl N4 O7					378.093	377.085	0.987		DDA for preferred ion	[M-H]-1	4	●	●	●	●	●	-4.01	0.519966	0.506483	0.514088	0.566938	0.528893	0.534745	0.510926	0.507849	0.590588	0.545347	1	1	0.527274	0.537891	4.48342	6.2163	1.02014	0.0287619	0.578032	0.711218
631	N147	Unknown_N019	C32 H37 N6 O12 P					728.221	727.214	0.857		DDA for preferred ion	[M-H]-1	4	●	●	●	●	●	0.81	1.01053	1.16428	0.923965	0.952457	0.922183	0.827211	0.874908	0.965158	0.818105	0.791869	1	1	0.994683	0.85545	10.185	7.98188	0.860023	-0.217552	0.0342629	0.0795495
632	N148	Unknown_N020	C7 H12 O8					224.053	223.045	0.996		DDA for preferred ion	[M-H]-1	4	●	●	●	●	●	-2.25	3.94111	4.30087	3.34172	4.63635	4.63816	4.24477	4.59616	3.94255	4.53693	5.10485	1	1	4.17164	4.48505	13.087	9.66249	1.07513	0.104508	0.344143	0.497578
633	N149	Unknown_N021	C7 H15 Cl O6					230.055	229.048	0.864		No MS2	[M-H]-1	4	●	●	●	●	●	-2.07	0.413073	0.457186	0.415925	0.540095	0.537701	0.59744	0.525088	0.61499	0.585344	0.580001	1	1	0.472796	0.580573	13.2875	5.82242	1.22796	0.296259	0.00966822	0.026341
634	N150	Unknown_N022	C6 H15 O13 P S					357.997	356.99	0.802		DDA for preferred ion	[M-H]-1	4	●	●	●	●	●	-0.61	0.583558	0.583459	0.553452	0.641167	0.6403	0.553373	0.591805	0.652272	0.602893	0.61067	1	1	0.600387	0.602203	6.46622	5.91283	1.00302	0.00435567	0.94047	0.949958
635	N151	Unknown_N023	C46 H58 N8 O12 P2 S					1008.34	1007.33	0.994		DDA for preferred ion	[M-H]-1	4	●	●	●	●	●	0.32	0.951247	1.15824	1.08237	1.40927	0.987693	1.08013	1.11756	1.14388	1.06414	1.03066	1	1	1.11776	1.08728	16.2836	4.09076	0.972723	-0.0398984	0.725394	0.813782
636	N152	Unknown_N024	C6 H4 O7 P2 S					281.915	280.908	0.745		DDA for preferred ion	[M-H]-1	4	●	●	●	●	●	0.54	0.778071	0.893234	0.773131	1.02376	0.901523	0.985343	0.899839	0.963178	0.91288	0.938987	1	1	0.873944	0.940045	11.8545	3.73937	1.07564	0.105189	0.213652	0.354317
637	N153	Unknown_N025	C19 H24 N4 O6					404.168	403.16	8.842		DDA for preferred ion	[M-H]-1	4	●	●	●	●	●	-4.58	4.53295	2.60934	2.09422	3.42251	2.19102	0.287456	0.201746	0.295133	0.125002	0.127603	1	1	2.97001	0.207388	34.3014	39.8315	0.0698274	-3.84006	0.000308008	0.00123241
638	N154	Unknown_N026	C5 H10 N3 O6 P					239.03	238.023	0.758		DDA for preferred ion	[M-H]-1	4	●	●	●	●	●	-1.01	0.691778	0.770035	0.701337	0.776043	0.690968	0.816657	0.7785	0.765557	0.776776	0.789948	1	1	0.726032	0.785488	5.94418	2.47633	1.08189	0.113555	0.0228965	0.056086
639	N155	Unknown_N027	C6 H N4 O7 P3 S					365.877	364.869	0.745		DDA for preferred ion	[M-H]-1	4	●	●	●	●	●	-3.37	0.758696	0.839588	0.739363	0.95501	0.844645	0.971645	0.880143	0.900514	0.859404	0.882189	1	1	0.82746	0.898779	10.3257	4.81307	1.08619	0.119276	0.134438	0.246419
640	N156	Unknown_N028	C8 H3 Cl2 O16 P3 S					549.773	548.766	0.746		DDA for preferred ion	[M-H]-1	4	●	●	●	●	●	0.03	0.641417	0.71988	0.626962	0.615794	0.564146	0.871808	0.759352	0.764833	0.762547	0.805732	1	1	0.63364	0.792854	8.88925	6.05724	1.25127	0.323392	0.00133888	0.00456358
641	N157	Unknown_N029	C19 H30 N4 O13					522.179	521.172	0.89		DDA for preferred ion	[M-H]-1	4	●	●	●	●	●	-3.67	0.395433	0.453447	0.517915	0.48535	0.529709	0.514919	0.542299	0.590511	0.533287	0.652379	1	1	0.476371	0.566679	11.3668	9.78595	1.18958	0.250447	0.0313535	0.0736485
642	N158	Unknown_N030	C23 H36 N4 O16					624.211	623.203	0.91		DDA for preferred ion	[M-H]-1	4	●	●	●	●	●	-3.2	0.587189	0.629645	0.690545	0.642506	0.673207	0.607178	0.672267	0.749126	0.681881	0.725698	1	1	0.644618	0.68723	6.23105	7.96058	1.0661	0.0923481	0.197952	0.335163
643	N159	Unknown_N031	C11 H26 N2 O12 P2					440.094	439.087	0.808		DDA for preferred ion	[M-H]-1	4	●	●	●	●	●	-4.79	3.09325	3.5511	3.45007	3.76147	3.59699	3.03111	3.14788	3.53908	3.52104	3.49007	1	1	3.49057	3.34584	7.13161	7.12131	0.958534	-0.0610978	0.375101	0.530841
644	N160	Unknown_N032	C20 H21 N7 O4					423.164	422.157	7.264		DDA for preferred ion	[M-H]-1	4	●	●	●	●	●	-3.87	1.897	2.10966	2.00529	2.3626	2.23663	2.07571	1.96014	2.05099	2.14209	2.08155	1	1	2.12224	2.0621	8.67018	3.20585	0.971663	-0.0414722	0.511036	0.659163
645	N161	Unknown_N033	C5 H12 N O8 P					245.03	244.022	0.843		DDA for preferred ion	[M-H]-1	4	●	●	●	●	●	-1.53	0.655462	0.669212	0.664916	0.691005	0.689942	0.758591	0.724676	0.780604	0.760658	0.763388	1	1	0.674107	0.757583	2.33658	2.68657	1.12383	0.168426	8.78143e-05	0.000399655
646	N162	Unknown_N034	C14 H23 N2 O18 P					538.069	537.062	0.809		DDA for preferred ion	[M-H]-1	4	●	●	●	●	●	1.94	0.824571	0.958109	0.895211	1.11191	1.04783	0.854528	0.832783	1.00358	0.95408	0.97269	1	1	0.967525	0.923532	11.9027	8.16671	0.95453	-0.0671372	0.495183	0.644945
647	N163	Unknown_N035	C4 H9 N O6					167.043	166.036	1.413		DDA for preferred ion	[M-H]-1	4	●	●	●	●	●	2.73	2.00273	2.16501	2.20664	2.1236	2.02209	2.01746	1.96668	2.11355	2.10922	2.20453	1	1	2.10402	2.08229	4.22484	4.4414	0.989672	-0.0149772	0.714702	0.807977
648	N164	Unknown_N036	C11 H12 N4 O10					360.055	359.048	1.797		DDA for preferred ion	[M-H]-1	4	●	●	●	●	●	-0.96	1.59265	2.23936	2.35482	2.70614	1.85542	0.0248946	0.0390438	0.032468	0.0200805	0.0246019	1	1	2.14968	0.0282177	20.2323	26.6145	0.0131265	-6.25137	4.42872e-06	2.46347e-05
649	N165	Unknown_N037	C2 H2 N2 O5 P2					195.944	194.937	0.807		No MS2	[M-H]-1	4	●	●	●	●	●	1.12	2.05433	2.04096	2.05951	2.34933	2.34077	2.01189	2.10246	2.29302	2.02802	2.09358	1	1	2.16898	2.10579	7.41821	5.31369	0.970868	-0.0426522	0.491487	0.64222
650	N166	Unknown_N038	C7 H12 O8					224.053	223.045	0.894		DDA for preferred ion	[M-H]-1	4	●	●	●	●	●	-2.14	5.40686	6.19898	7.69573	6.51913	6.63757	5.57404	5.46771	6.85637	5.68801	6.46421	1	1	6.49165	6.01007	12.7361	10.2246	0.925815	-0.111204	0.326417	0.477988
651	N167	Unknown_N039	C19 H36 O18					552.189	551.181	0.991		No MS2	[M-H]-1	4	●	●	●	●	●	-2.61	0.277543	0.297757	0.343317	0.377262	0.28997	0.310725	0.283163	0.377395	0.290935	0.332344	1	1	0.31717	0.318912	13.1723	11.8663	1.00549	0.00790421	0.94659	0.953735
652	N168	Unknown_N040	C5 H Cl N4 O16 P2 S2					533.799	532.792	0.745		No MS2	[M-H]-1	4	●	●	●	●	●	-0.1	0.348881	0.386143	0.342487	0.42252	0.364287	0.495497	0.421991	0.431332	0.425227	0.43688	1	1	0.372864	0.442185	8.7045	6.86265	1.18592	0.246003	0.00821497	0.0230838
653	N169	Unknown_N041	C19 H29 N5 O11					503.185	502.177	0.887		DDA for preferred ion	[M-H]-1	4	●	●	●	●	●	-3.6	0.656799	0.717176	0.773212	0.746544	0.774261	0.765046	0.796422	0.878149	0.788184	0.943455	1	1	0.733598	0.834251	6.66343	8.92896	1.1372	0.185491	0.0354711	0.0818801
654	N170	Unknown_N042	C3 H5 O P3 S					181.928	180.921	0.763		DDA for preferred ion	[M-H]-1	4	●	●	●	●	●	3.89	0.639734	0.748469	0.69426	0.721403	0.686674	0.652423	0.634464	0.641523	0.630237	0.65641	1	1	0.698108	0.643011	5.83269	1.75011	0.921077	-0.118606	0.0194003	0.0487135
655	N171	Unknown_N043	C10 H13 N3 O5					255.085	254.078	2.94		DDA for preferred ion	[M-H]-1	4	●	●	●	●	●	-1.51	4.42632	4.76124	4.63596	4.53439	4.32581	5.53149	5.24772	5.55775	5.19224	5.57058	1	1	4.53675	5.41996	3.76875	3.39749	1.19468	0.256623	4.96016e-05	0.000235094
656	N172	Unknown_N044	C2 H2 N2 O P2					131.964	130.957	0.748		DDA for preferred ion	[M-H]-1	4	●	●	●	●	●	-2.71	0.69097	0.769181	0.7156	0.738558	0.692164	0.801636	0.739535	0.775764	0.763875	0.759766	1	1	0.721294	0.768115	4.59382	2.97349	1.06491	0.0907342	0.031545	0.0738817
657	N173	Unknown_N045	C39 H32 N6 O8					712.227	711.22	0.876		DDA for preferred ion	[M-H]-1	4	●	●	●	●	●	-1.95	0.693357	0.853809	0.767826	0.830292	0.85907	0.756632	0.772241	0.868389	0.807471	0.889529	1	1	0.800871	0.818852	8.76417	7.12678	1.02245	0.0320337	0.671246	0.775856
658	N174	Unknown_N046	C6 H3 N8 O8 P S					377.952	376.944	0.747		DDA for preferred ion	[M-H]-1	4	●	●	●	●	●	-4.12	0.568282	0.60404	0.54343	0.565006	0.527698	0.247573	0.260854	0.257142	0.267644	0.242675	1	1	0.561691	0.255178	5.14206	3.94632	0.454302	-1.13828	1.66493e-08	1.56896e-07
659	N175	Unknown_N047	C26 H36 N4 O9 P2					610.195	609.188	0.97		DDA for preferred ion	[M-H]-1	4	●	●	●	●	●	-0.94	0.206123	0.247243	0.195706	0.228252	0.258819	0.210035	0.211051	0.215171	0.307252	0.277886	1	1	0.227229	0.244279	11.7237	18.5564	1.07504	0.104385	0.489037	0.641411
660	N176	Unknown_N048	C5 H6 Cl O14 P3 S					449.838	448.831	0.745		No MS2	[M-H]-1	4	●	●	●	●	●	0	0.468477	0.509357	0.438997	0.595058	0.519827	0.602074	0.537254	0.566336	0.571919	0.579815	1	1	0.506343	0.57148	11.6967	4.10703	1.12864	0.174587	0.0515646	0.11103
661	N177	Unknown_N049	C31 H46 N4 O11 P2					712.263	757.261	0.896		DDA for other ion	[M+FA-H]-1	4	●	●	●	●	●	-1.08	0.189733	0.268446	0.28816	0.251295	0.29613	0.21787	0.275031	0.279811	0.234728	0.356355	1	1	0.258753	0.272759	16.3682	19.66	1.05413	0.0760545	0.658902	0.767122
662	N178	Unknown_N050	C15 H15 N7 O4					357.117	356.11	6.911		DDA for preferred ion	[M-H]-1	4	●	●	●	●	●	-4.56	1.91068	1.96698	1.98051	1.9893	1.97246	2.02776	1.89962	2.00921	2.06932	1.97576	1	1	1.96398	1.99633	1.57687	3.19335	1.01647	0.0235699	0.337297	0.490335
663	N179	Unknown_N051	C13 H16 N4 O8					356.095	355.088	0.892		DDA for preferred ion	[M-H]-1	4	●	●	●	●	●	-4.33	0.627769	0.682584	0.610356	0.651368	0.695484	0.607527	0.633831	0.682408	0.665226	0.728119	1	1	0.653512	0.663422	5.48347	6.96861	1.01516	0.0217129	0.714669	0.807977
664	N180	Unknown_N052	C54 H65 N10 O14 P3					1170.39	1169.38	0.994		DDA for preferred ion	[M-H]-1	4	●	●	●	●	●	0.35	0.496149	0.578519	0.544755	0.575573	0.571403	0.549556	0.537912	0.619842	0.625712	0.587141	1	1	0.55328	0.584033	6.26043	6.81939	1.05558	0.0780403	0.228886	0.376096
665	N181	Unknown_N053	C35 H41 N6 O14 P					800.243	799.236	1.163		DDA for preferred ion	[M-H]-1	4	●	●	●	●	●	1.21	1.24369	1.73425	1.57384	0.782757	1.44078	1.25323	1.0751	1.07536	0.857429	0.583516	1	1	1.35507	0.968926	27.0881	26.5345	0.71504	-0.483904	0.0901813	0.17969
666	N182	Unknown_N054	C26 H36 N4 O10					564.241	563.234	7.298		DDA for preferred ion	[M-H]-1	4	●	●	●	●	●	-3.41	1.38455	1.36248	1.18746	1.18795	1.4209	1.56154	1.39965	1.31327	1.63282	1.17498	1	1	1.30867	1.41645	8.58697	13.0703	1.08236	0.114181	0.298094	0.448822
667	N183	Unknown_N055	C8 H18 Cl2 O14 P2 S					501.927	500.919	0.676		DDA for preferred ion	[M-H]-1	4	●	●	●	●	●	-0.68	0.522236	0.58885	0.555066	0.529087	0.505192	0.000912258	0.000875504	0.00135144	0.00112791	0.00153043	1	1	0.540086	0.00115951	6.0421	24.2868	0.0021469	-8.86353	3.17171e-10	6.68563e-09
668	N184	Unknown_N056	C3 H3 N4 O3 P3 S2					299.887	298.88	0.746		No MS2	[M-H]-1	4	●	●	●	●	●	4.37	0.568716	0.593049	0.573406	0.581242	0.537473	0.700327	0.638606	0.652448	0.65152	0.690486	1	1	0.570777	0.666678	3.63921	4.05231	1.16802	0.224062	0.000234656	0.000958978
669	N185	Unknown_N057	C4 H11 N2 O7 P					230.03	229.023	0.8		No MS2	[M-H]-1	4	●	●	●	●	●	-2.13	0.384554	0.426239	0.407262	0.425053	0.41664	0.315222	0.341165	0.398961	0.338744	0.34975	1	1	0.41195	0.348769	4.15235	8.84198	0.84663	-0.240197	0.00391575	0.0120173
670	N186	Unknown_N058	C29 H31 N6 O9 P					638.19	637.183	1.031		DDA for preferred ion	[M-H]-1	4	●	●	●	●	●	1.48	0.46475	0.49588	0.489863	0.471568	0.458995	0.333843	0.285545	0.304336	0.316192	0.302369	1	1	0.476211	0.308457	3.35748	5.80676	0.647731	-0.626533	2.80917e-07	2.06435e-06
671	N187	Unknown_N059	C30 H53 N8 O17 P3					890.274	889.267	0.855		DDA for preferred ion	[M-H]-1	4	●	●	●	●	●	0.06	0.498152	0.508886	0.446885	0.474704	0.381967	0.35241	0.370245	0.449774	0.381472	0.380581	1	1	0.462119	0.386896	10.981	9.575	0.837222	-0.256317	0.0280486	0.0672663
672	N188	Unknown_N060	C25 H31 N6 O12 P3					700.122	699.115	0.811		DDA for preferred ion	[M-H]-1	4	●	●	●	●	●	1.19	0.371315	0.411877	0.402673	0.526013	0.493119	0.380636	0.358536	0.445429	0.42702	0.448945	1	1	0.440999	0.412113	14.8334	9.81922	0.934498	-0.0977368	0.425442	0.581534
673	N189	Unknown_N061	C5 H4 Cl N4 O5 P3					327.908	326.901	0.718		DDA for preferred ion	[M-H]-1	4	●	●	●	●	●	0.12	0.237574	0.271406	0.210979	0.185706	0.212681	0.0145973	0.0139616	0.0111769	0.0123474	0.0138546	1	1	0.223669	0.0131875	14.479	10.5753	0.0589601	-4.08412	4.95849e-07	3.36589e-06
674	N190	Unknown_N062	C11 H17 N3 O7					303.108	302.101	0.839		DDA for preferred ion	[M-H]-1	4	●	●	●	●	●	4.86	0.36773	0.437912	0.394403	0.406585	0.382974	0.447179	0.443897	0.494145	0.483738	0.474543	1	1	0.397921	0.4687	6.67457	4.75415	1.17787	0.236185	0.00183748	0.00598301
675	N191	Unknown_N063	C47 H58 N8 O13 P2 S					1036.33	1035.33	0.965		DDA for preferred ion	[M-H]-1	4	●	●	●	●	●	0.44	0.176684	0.183153	0.140367	0.151428	0.177985	0.176214	0.214044	0.192266	0.198012	0.142492	1	1	0.165923	0.184606	11.3609	14.7083	1.1126	0.15393	0.241872	0.389104
676	N192	Unknown_N064	C15 H27 N10 O14 P					602.146	601.139	0.878		No MS2	[M-H]-1	4	●	●	●	●	●	2.3	0.313128	0.351111	0.435341	0.410937	0.428593	0.313214	0.340013	0.390302	0.32457	0.365372	1	1	0.387822	0.346694	13.7543	9.01289	0.893952	-0.16173	0.175172	0.302399
677	N193	Unknown_N065	C8 H2 Cl N4 O14 P3 S4					633.735	632.727	0.746		No MS2	[M-H]-1	4	●	●	●	●	●	-0.87	0.372241	0.365952	0.338036	0.342424	0.296209	0.497531	0.412342	0.420837	0.440357	0.449334	1	1	0.342972	0.44408	8.74249	7.50746	1.2948	0.372728	0.000999017	0.0035884
678	N194	Unknown_N066	C16 H22 O5 P2					356.095	355.088	0.814		No MS2	[M-H]-1	4	●	●	●	●	●	2.13	0.369946	0.407226	0.413574	0.495801	0.438855	0.528774	0.516491	0.541845	0.553568	0.507194	1	1	0.42508	0.529574	10.96	3.53139	1.24582	0.317098	0.00163555	0.00541353
679	N195	Unknown_N067	C15 H14 N6 O12					470.067	469.059	0.831		DDA for preferred ion	[M-H]-1	4	●	●	●	●	●	-0.71	0.460378	0.447367	0.40402	0.396544	0.348006	0.372605	0.37524	0.401862	0.368085	0.331964	1	1	0.411263	0.369951	10.8649	6.75738	0.899548	-0.152727	0.108854	0.206123
680	N196	Unknown_N068	C12 H18 N10 O9					446.127	445.12	0.896		DDA for preferred ion	[M-H]-1	4	●	●	●	●	●	2.25	0.361374	0.390957	0.396877	0.426293	0.414709	0.385495	0.418292	0.437801	0.393848	0.47362	1	1	0.398042	0.421811	6.24552	8.42613	1.05972	0.0836766	0.255279	0.404107
681	N197	Unknown_N069	C6 H8 N4 O11 S					343.991	342.984	0.774		DDA for preferred ion	[M-H]-1	4	●	●	●	●	●	-0.39	0.280658	0.281083	0.285095	0.301612	0.265221	0.257707	0.300098	0.292477	0.303299	0.289914	1	1	0.282734	0.288699	4.59695	6.2907	1.0211	0.0301229	0.566833	0.701751
682	N198	Unknown_N070	C6 H15 O8 P					246.05	245.043	0.848		No MS2	[M-H]-1	4	●	●	●	●	●	-1.29	0.440057	0.467796	0.445182	0.471221	0.44137	0.558916	0.511124	0.545671	0.593762	0.536781	1	1	0.453125	0.549251	3.33735	5.53476	1.21214	0.277555	0.000225262	0.000925307
683	N199	Unknown_N071	C20 H31 Cl N4 O12					554.161	553.154	0.859		DDA for preferred ion	[M-H]-1	4	●	●	●	●	●	-3.46	0.638275	0.718552	0.62269	0.841358	0.786048	0.745838	0.71222	0.795323	0.728413	0.763112	1	1	0.721385	0.748981	13.0096	4.29097	1.03826	0.0541612	0.551215	0.693602
684	N200	Unknown_N072	C4 H6 O P2					131.99	130.983	0.675		DDA for preferred ion	[M-H]-1	4	●	●	●	●	●	3.62	0.626872	0.692194	0.599018	0.61789	0.593302	0.0574006	0.0561793	0.0603594	0.0594446	0.0615874	1	1	0.625855	0.0589943	6.31354	3.71902	0.0942618	-3.40718	9.83335e-10	1.60745e-08
685	N201	Unknown_N073	C6 H13 N5 O7 S					299.053	298.046	0.813		DDA for preferred ion	[M-H]-1	4	●	●	●	●	●	-0.67	0.276264	0.305631	0.266139	0.313906	0.290811	0.263089	0.281543	0.320993	0.314302	0.32268	1	1	0.29055	0.300521	6.82517	8.89988	1.03432	0.0486814	0.521929	0.66886
686	N202	Unknown_N074	C28 H24 N4 O12					608.139	607.131	6.696		DDA for preferred ion	[M-H]-1	4	●	●	●	●	●	-0.75	0.87022	0.979639	0.597891	0.946221	0.932279	0.966355	1.00516	0.951697	0.996321	0.994466	1	1	0.86525	0.9828	17.8709	2.30731	1.13586	0.183781	0.131092	0.240836
687	N203	Unknown_N075	C27 H36 N4 O10 P2					638.19	637.182	1.247		DDA for preferred ion	[M-H]-1	4	●	●	●	●	●	-1.4	0.732758	0.846877	0.836111	0.751207	0.738253	0.538649	0.495286	0.538057	0.545986	0.547024	1	1	0.781041	0.533	7.13416	4.02956	0.682423	-0.551262	1.46945e-05	7.69301e-05
688	N204	Unknown_N076	C7 H3 O3 P S					197.954	196.946	0.745		DDA for preferred ion	[M-H]-1	4	●	●	●	●	●	-2.13	0.369271	0.39889	0.367327	0.476604	0.438104	0.434705	0.405813	0.41947	0.417681	0.423721	1	1	0.410039	0.420278	11.4579	2.48592	1.02497	0.0355819	0.647017	0.761029
689	N205	Unknown_N077	C32 H46 N4 O15 S					758.269	757.261	0.896		DDA for preferred ion	[M-H]-1	4	●	●	●	●	●	0.96	0.189733	0.268446	0.28816	0.251295	0.29613	0.21787	0.275031	0.279811	0.234728	0.356355	1	1	0.258753	0.272759	16.3682	19.66	1.05413	0.0760545	0.658902	0.767122
690	N206	Unknown_N078	C12 H29 N4 O6 P3					418.132	417.125	0.987		DDA for preferred ion	[M-H]-1	4	●	●	●	●	●	4.84	0.366221	0.381385	0.405619	0.443286	0.406366	0.538863	0.51991	0.637118	0.4792	0.46864	1	1	0.400576	0.528746	7.31205	12.6843	1.31997	0.4005	0.00444286	0.0133286
691	N207	Unknown_N079	C17 H39 N6 O6 P3					516.216	515.209	0.996		DDA for preferred ion	[M-H]-1	4	●	●	●	●	●	3.1	0.517209	0.479136	0.556087	0.598163	0.517352	0.532901	0.594295	0.661046	0.497026	0.606993	1	1	0.53359	0.578452	8.4714	11.1341	1.08408	0.116467	0.238122	0.386105
692	N208	Unknown_N080	C12 H22 N6 O14					474.121	473.114	0.951		DDA for preferred ion	[M-H]-1	4	●	●	●	●	●	4.27	0.643995	0.705062	0.707746	0.724126	0.645393	0.632432	0.687789	0.656351	0.64638	0.616711	1	1	0.685264	0.647933	5.50897	4.13908	0.945522	-0.0808168	0.109109	0.206123
693	N209	Unknown_N081	C11 H15 N5 O6					313.102	312.095	4.483		DDA for preferred ion	[M-H]-1	4	●	●	●	●	●	-0.31	3.04865	3.42874	3.31378	3.48727	3.38969	2.29481	2.44933	2.45739	2.2868	2.3594	1	1	3.33362	2.36955	5.13915	3.44267	0.710802	-0.49248	3.2496e-06	1.84605e-05
694	N210	Unknown_N082	C19 H35 N O14					501.205	500.198	0.903		No MS2	[M-H]-1	4	●	●	●	●	●	-0.99	0.110553	0.144649	0.132464	0.146797	0.142726	0.148137	0.137047	0.14674	0.146618	0.162528	1	1	0.135438	0.148214	11.0448	6.16825	1.09433	0.130054	0.141833	0.257376
695	N211	Unknown_N083	C5 H7 N7 O6 P2					322.992	321.985	0.756		DDA for preferred ion	[M-H]-1	4	●	●	●	●	●	-4.03	0.136301	0.15498	0.145173	0.158156	0.125263	0.16408	0.164281	0.15382	0.164734	0.1703	1	1	0.143975	0.163443	9.40029	3.65034	1.13522	0.182972	0.0186179	0.0471929
696	N212	Unknown_N084	C7 H10 N O6 P					235.024	234.017	0.932		No MS2	[M-H]-1	4	●	●	●	●	●	-2.15	0.193944	0.181005	0.185661	0.174129	0.183174	0.179032	0.165326	0.197716	0.181236	0.186175	1	1	0.183583	0.181897	3.92674	6.45687	0.990819	-0.013307	0.791402	0.860126
697	N213	Unknown_N085	C11 H30 N5 O14 P					487.153	486.146	1		No MS2	[M-H]-1	4	●	●	●	●	●	1.05	0.154558	0.152475	0.180525	0.193021	0.165953	0.179726	0.165846	0.185587	0.168851	0.195792	1	1	0.169307	0.17916	10.2314	6.84605	1.0582	0.0816145	0.329576	0.481734
698	N214	Unknown_N086	C22 H26 O11 P2					528.096	527.088	0.896		No MS2	[M-H]-1	4	●	●	●	●	●	1.21	0.14354	0.229549	0.182954	0.25593	0.26842	0.226781	0.184825	0.250517	0.252852	0.243189	1	1	0.216079	0.231633	24.1234	12.1245	1.07198	0.100283	0.573133	0.707365
699	N215	Unknown_N087	C19 H18 N6 O5					410.132	409.125	8.091		DDA for preferred ion	[M-H]-1	4	●	●	●	●	●	-3.9	0.6101	0.646693	0.317535	0.670905	0.65206	0.670819	0.347375	0.667849	0.342951	0.306472	1	1	0.579459	0.467093	25.5529	39.6717	0.806086	-0.310995	0.320405	0.471816
700	N216	Unknown_N088	C27 H42 O14 P2					652.206	651.198	1.001		No MS2	[M-H]-1	4	●	●	●	●	●	1.04	0.178173	0.166848	0.173034	0.158754	0.169303	0.190759	0.164318	0.227413	0.174732	0.193933	1	1	0.169223	0.190231	4.2805	12.6276	1.12415	0.16883	0.0980592	0.192513
701	N217	Unknown_N089	C20 H24 N4 O8					448.158	447.15	8.995		DDA for preferred ion	[M-H]-1	4	●	●	●	●	●	-3.85	0.822176	0.550772	0.719907	0.45023	0.412643	0.551022	0.838244	0.827795	0.777721	0.489862	1	1	0.591146	0.696929	29.7006	23.5542	1.17895	0.237498	0.35389	0.508916
702	N218	Unknown_N090	C18 H30 O9					390.189	389.181	7.468		No MS2	[M-H]-1	4	●	●	●	●	●	-0.69	0.56086	0.59061	0.785802	0.748324	0.724838	0.0194853	0.0181322	0.0213955	0.00563058	0.0158732	1	1	0.682087	0.0161034	14.6675	38.4427	0.023609	-5.40452	4.15095e-07	2.91659e-06
703	N219	Unknown_N091	C7 H4 Cl O8 P3 S4					471.768	470.761	0.751		No MS2	[M-H]-1	4	●	●	●	●	●	-2.5	0.133407	0.174189	0.153535	0.152156	0.135806	0.161832	0.151802	0.142562	0.14024	0.158779	1	1	0.149819	0.151043	10.9621	6.32828	1.00817	0.0117439	0.888989	0.920001
704	N220	Unknown_N092	C27 H49 N8 O13 P3					786.264	785.256	0.901		No MS2	[M-H]-1	4	●	●	●	●	●	0.6	0.132737	0.160617	0.154612	0.132977	0.169364	0.138914	0.139191	0.147253	0.144911	0.149223	1	1	0.150062	0.143898	11.0345	3.25267	0.958928	-0.0605059	0.44631	0.606951
705	N221	Unknown_N093	C3 H8 N9 P					201.063	200.056	0.899		DDA for preferred ion	[M-H]-1	4	●	●	●	●	●	-4.77	0.273579	0.285502	0.278234	0.277729	0.276847	0.274928	0.270965	0.297548	0.272746	0.298105	1	1	0.278378	0.282859	1.57157	4.85656	1.01609	0.0230351	0.506786	0.657905
706	N222	Unknown_N094	C15 H25 Cl N10 O10					540.145	539.138	1.319		DDA for preferred ion	[M-H]-1	4	●	●	●	●	●	1.41	0.310618	0.326035	0.316655	0.340246	0.327178	0.353482	0.355547	0.353168	0.361557	0.342549	1	1	0.324146	0.35326	3.48714	1.94508	1.08982	0.124087	0.00116189	0.00402888
707	N223	Unknown_N095	C20 H25 N5 O6					431.18	430.173	5.515		DDA for preferred ion	[M-H]-1	4	●	●	●	●	●	-0.92	0.350928	0.415429	0.392675	0.453683	0.457105	0.384135	0.392815	0.400582	0.423271	0.417723	1	1	0.413964	0.403705	10.7134	4.09022	0.975218	-0.0362029	0.640863	0.758055
708	N224	Unknown_N096	C7 H9 N O5 S					219.02	218.012	5.201		DDA for preferred ion	[M-H]-1	4	●	●	●	●	●	-2.23	0.402593	0.471756	0.437831	0.445261	0.41895	0.449705	0.410876	0.427096	0.412421	0.453716	1	1	0.435278	0.430763	6.04754	4.68764	0.989626	-0.015044	0.76864	0.845896
709	N225	Unknown_N097	C3 H9 N4 O P					148.052	147.044	5.166		DDA for preferred ion	[M-H]-1	4	●	●	●	●	●	0.72	0.5058	0.62081	0.329466	0.65757	0.652777	0.557749	0.556089	0.570687	0.582538	0.588647	1	1	0.553285	0.571142	25.1876	2.54104	1.03228	0.0458275	0.782893	0.852424
710	N226	Unknown_N098	C2 H3 N2 O4 P S2					213.928	212.92	0.747		DDA for preferred ion	[M-H]-1	4	●	●	●	●	●	2.26	1.1317	1.25936	1.14889	1.21894	1.13397	1.34854	1.30179	1.26149	1.27525	1.35229	1	1	1.17857	1.30787	4.87863	3.17059	1.10971	0.150182	0.00354188	0.0109117
711	N227	Unknown_N099	C9 H10 N10 O4					322.09	321.082	1.034		DDA for preferred ion	[M-H]-1	4	●	●	●	●	●	3.04	0.168714	0.19575	0.178637	0.166245	0.164138	0.215535	0.206058	0.199051	0.204158	0.219544	1	1	0.174697	0.208869	7.44963	4.04036	1.19561	0.257745	0.00115483	0.00402183
712	N228	Unknown_N100	C29 H34 N3 O9 P					599.206	598.198	0.927		DDA for preferred ion	[M-H]-1	4	●	●	●	●	●	3.78	0.169142	0.150462	0.149215	0.134417	0.159785	0.145605	0.144148	0.191211	0.1768	0.15689	1	1	0.152604	0.162931	8.49305	12.5841	1.06767	0.0944649	0.368989	0.523116
713	N229	Unknown_N101	C22 H31 N5 O15					605.18	604.173	0.978		No MS2	[M-H]-1	4	●	●	●	●	●	-2.87	0.223779	0.223429	0.20724	0.262857	0.242276	0.223063	0.236382	0.239218	0.233612	0.233823	1	1	0.231916	0.23322	9.17684	2.62273	1.00562	0.00808714	0.898518	0.925408
714	N230	Unknown_N102	C19 H25 N4 O9 P					484.134	483.127	7.863		DDA for preferred ion	[M-H]-1	4	●	●	●	●	●	-4	0.00156081	0.00153739	0.0014907	0.00131083	0.00129643	0.596601	0.577206	0.522354	0.645534	0.609273	1	1	0.00143923	0.590194	8.78502	7.6895	410.075	8.67974	2.15887e-09	2.74485e-08
715	N231	Unknown_N103	C16 H30 O15					462.158	461.151	1.005		No MS2	[M-H]-1	4	●	●	●	●	●	-0.61	0.174384	0.154104	0.166551	0.16155	0.158312	0.218055	0.200156	0.224524	0.170146	0.194825	1	1	0.16298	0.201541	4.80621	10.6233	1.2366	0.306376	0.00537245	0.0155918
716	N232	Unknown_N104	C20 H30 O9					414.189	413.181	6.104		DDA for preferred ion	[M-H]-1	4	●	●	●	●	●	-1.01	0.108593	0.119312	0.11829	0.122336	0.115281	0.785123	0.738939	0.758335	0.792045	0.775811	1	1	0.116762	0.770051	4.46746	2.79226	6.59502	2.72138	3.08154e-12	1.12198e-10
717	N233	Unknown_N105	C14 H32 N5 O7 P3					475.153	474.146	0.806		DDA for preferred ion	[M-H]-1	4	●	●	●	●	●	3.45	0.273109	0.315733	0.276837	0.309833	0.355481	0.329973	0.315418	0.351718	0.348086	0.318431	1	1	0.306199	0.332725	10.9417	5.00239	1.08663	0.119864	0.151501	0.269671
718	N234	Unknown_N106	C16 H12 N6 O2					320.101	319.093	0.936		DDA for preferred ion	[M-H]-1	4	●	●	●	●	●	-4.64	0.229372	0.217535	0.233148	0.199983	0.245992	0.204793	0.224088	0.273171	0.237628	0.233203	1	1	0.225206	0.234576	7.71505	10.6528	1.04161	0.0588117	0.510655	0.659163
719	N235	Unknown_N107	C14 H15 N3 O8					353.086	352.078	8.961		DDA for preferred ion	[M-H]-1	4	●	●	●	●	●	-0.62	0.510363	1.09948	1.09617	0.572039	1.06725	0.521649	0.999735	1.09841	0.498283	1.14639	1	1	0.869062	0.852894	34.5602	37.2368	0.981397	-0.0270919	0.936118	0.949153
720	N236	Unknown_N108	C19 H27 N2 P3 S2					440.082	439.074	0.797		DDA for preferred ion	[M-H]-1	4	●	●	●	●	●	-2.95	0.284438	0.139194	0.226283	0.288403	0.100897	0.319196	0.226923	0.130966	0.0821598	0.320322	1	1	0.207843	0.215913	40.8586	50.0948	1.03883	0.0549581	0.898836	0.925408
721	N237	Unknown_N109	C H2 N4 O6 P2 S5					387.807	386.8	0.753		No MS2	[M-H]-1	4	●	●	●	●	●	4.08	0.240948	0.302596	0.251088	0.267857	0.230942	0.276375	0.248328	0.24225	0.235801	0.25854	1	1	0.258686	0.252259	10.8555	6.29147	0.975153	-0.0363001	0.667712	0.774004
722	N238	Unknown_N110	C33 H39 N8 O9 P					722.259	721.251	1.017		DDA for preferred ion	[M-H]-1	4	●	●	●	●	●	1.19	0.215197	0.230052	0.2203	0.235817	0.23073	0.241024	0.238589	0.243488	0.271723	0.268944	1	1	0.226419	0.252753	3.71802	6.39808	1.11631	0.158733	0.0120595	0.0319856
723	N239	Unknown_N111	C10 H15 N3 O6					273.096	272.089	1.059		DDA for preferred ion	[M-H]-1	4	●	●	●	●	●	-0.81	0.462532	0.506686	0.509741	0.491548	0.465938	0.591205	0.559811	0.548858	0.559435	0.55262	1	1	0.487289	0.562386	4.55104	2.98106	1.15411	0.206782	0.000309257	0.00123241
724	N240	Unknown_N112	C11 H3 Cl O18 S5					617.761	616.753	0.744		No MS2	[M-H]-1	4	●	●	●	●	●	-0.81	0.229401	0.253448	0.231577	0.285687	0.249494	0.310712	0.268748	0.285324	0.275452	0.287278	1	1	0.249921	0.285503	9.05687	5.59439	1.14237	0.192031	0.0207655	0.0516559
725	N241	Unknown_N113	C29 H47 Cl O14 P2					716.214	715.207	0.856		No MS2	[M-H]-1	4	●	●	●	●	●	1.25	0.304816	0.357021	0.294912	0.405061	0.397188	0.338743	0.3527	0.392358	0.377728	0.368463	1	1	0.3518	0.365999	14.4716	5.72826	1.04036	0.0570845	0.580031	0.712585
726	N242	Unknown_N114	C20 H30 N4 O15					566.169	565.162	0.889		No MS2	[M-H]-1	4	●	●	●	●	●	-3.1	0.169913	0.226117	0.260302	0.21981	0.240582	0.157779	0.187888	0.214129	0.161923	0.233071	1	1	0.223345	0.190958	15.081	17.0972	0.854991	-0.226018	0.161206	0.281935
727	N243	Unknown_N115	C4 H7 Cl N2 O6 S					245.971	244.964	0.678		DDA for preferred ion	[M-H]-1	4	●	●	●	●	●	-1.16	0.218846	0.258961	0.229344	0.240876	0.208228	0.00322884	0.0030252	0.00357206	0.00358031	0.00379937	1	1	0.231251	0.00344116	8.50707	8.99118	0.0148806	-6.07042	5.31554e-09	5.91695e-08
728	N244	Unknown_N116	C20 H32 N4 O13					536.195	535.187	0.901		DDA for preferred ion	[M-H]-1	4	●	●	●	●	●	-3.48	0.173415	0.206634	0.226809	0.219669	0.236944	0.22395	0.236388	0.240768	0.230879	0.291333	1	1	0.212694	0.244664	11.5537	10.9687	1.15031	0.202022	0.0850537	0.170747
729	N245	Unknown_N117	C37 H46 N7 O13 P					827.29	826.283	0.86		DDA for preferred ion	[M-H]-1	4	●	●	●	●	●	1.24	0.227353	0.243675	0.212928	0.259429	0.266166	0.249766	0.246725	0.295838	0.280832	0.260172	1	1	0.24191	0.266667	9.12764	7.90421	1.10234	0.140565	0.107325	0.205664
730	N246	Unknown_N118	C12 H18 O5					242.115	241.108	6.669		DDA for preferred ion	[M-H]-1	4	●	●	●	●	●	-1.43	0.0142711	0.0128678	0.0131404	0.0184805	0.0195734	0.972183	0.964523	0.963276	0.990759	0.991151	1	1	0.0156666	0.976379	20.0184	1.40696	62.3221	5.96167	3.88578e-15	3.07005e-12
731	N247	Unknown_N119	C14 H4 Cl O5 P3 S					411.87	410.862	0.72		No MS2	[M-H]-1	4	●	●	●	●	●	3.69	0.187163	0.22155	0.170279	0.147945	0.180649	0.00990398	0.00914196	0.0126881	0.0114119	0.0127399	1	1	0.181517	0.0111772	14.8046	14.5254	0.0615764	-4.02148	6.05853e-07	3.94544e-06
732	N248	Unknown_N120	C18 H30 O16					502.153	501.146	0.904		No MS2	[M-H]-1	4	●	●	●	●	●	-0.96	0.00964861	0.013478	0.00985775	0.0148571	0.00880581	0.224908	0.239114	0.265301	0.236018	0.281505	1	1	0.0113295	0.249369	23.5275	9.3366	22.0107	4.46013	1.49608e-08	1.42662e-07
733	N249	Unknown_N121	C3 H5 N2 P S3					195.935	194.928	0.809		No MS2	[M-H]-1	4	●	●	●	●	●	-2.19	0.248876	0.244607	0.214063	0.308614	0.306147	0.268821	0.281539	0.283557	0.240983	0.260962	1	1	0.264461	0.267172	15.664	6.48828	1.01025	0.0147144	0.895948	0.924813
734	N250	Unknown_N122	C8 H7 N7 O2					233.066	232.059	5.169		DDA for preferred ion	[M-H]-1	4	●	●	●	●	●	-0.39	0.627704	0.667452	0.663376	0.689564	0.666303	0.625274	0.644941	0.655127	0.681157	0.68592	1	1	0.66288	0.658484	3.35828	3.84516	0.993368	-0.00959969	0.778032	0.851064
735	N251	Unknown_N123	C9 H8 Cl N7 O4 P2 S					406.953	405.946	0.755		DDA for preferred ion	[M-H]-1	4	●	●	●	●	●	2.6	0.128957	0.144488	0.133587	0.145165	0.12302	0.170816	0.161081	0.144103	0.163253	0.157278	1	1	0.135044	0.159306	7.17349	6.16994	1.17967	0.238379	0.00434911	0.0130964
736	N252	Unknown_N124	C21 H44 N5 O12 P3					651.222	650.214	0.864		No MS2	[M-H]-1	4	●	●	●	●	●	2.43	0.261893	0.297222	0.277034	0.266655	0.282335	0.288727	0.292697	0.342082	0.316529	0.321515	1	1	0.277028	0.31231	5.01693	7.03291	1.12736	0.172948	0.0161795	0.0414673
737	N253	Unknown_N125	C2 H7 N4 O3 P3					227.973	226.966	0.713		DDA for preferred ion	[M-H]-1	4	●	●	●	●	●	-1.15	0.0936741	0.0908051	0.0886604	0.102217	0.0944767	0.00732175	0.00714649	0.00742426	0.0068356	0.0116503	1	1	0.0939666	0.00807568	5.49274	24.8985	0.0859421	-3.54049	5.23541e-10	1.07527e-08
738	N254	Unknown_N126	C42 H47 N10 O15 P					962.295	961.288	1.185		DDA for preferred ion	[M-H]-1	4	●	●	●	●	●	-0.53	0.505248	0.680893	0.685114	0.591274	0.668835	0.450333	0.40796	0.414833	0.431488	0.417319	1	1	0.626273	0.424387	12.4016	3.96862	0.677638	-0.561412	0.000464828	0.00179868
739	N255	Unknown_N127	C4 H10 N O8 P					231.014	230.007	0.811		DDA for preferred ion	[M-H]-1	4	●	●	●	●	●	-2.2	1.06066	1.11121	1.06283	1.15498	1.04723	1.09595	1.12044	1.28616	1.17077	1.16726	1	1	1.08738	1.16811	4.12973	6.26512	1.07424	0.103322	0.0686745	0.14214
740	N256	Unknown_N128	C5 H10 N7 O11 P3					436.965	435.957	1.783		DDA for preferred ion	[M-H]-1	4	●	●	●	●	●	-1.1	0.975077	1.01427	0.963747	0.963895	0.957608	0.00940191	0.00919818	0.0102375	0.0102509	0.00957299	1	1	0.974919	0.00973228	2.347	4.99146	0.00998266	-6.64636	1.78524e-13	2.85987e-11
741	N257	Unknown_N129	C5 H5 N9 O2					223.056	222.049	0.757		DDA for preferred ion	[M-H]-1	4	●	●	●	●	●	-0.68	0.155699	0.198177	0.169132	0.237917	0.2229	0.190604	0.199429	0.205419	0.196528	0.19772	1	1	0.196765	0.19794	17.6575	2.69723	1.00597	0.0085888	0.942259	0.950566
742	N258	Unknown_N130	C14 H31 N4 O11 P					462.174	461.166	7.65		DDA for preferred ion	[M-H]-1	4	●	●	●	●	●	1.88	0.58829	0.661286	0.639179	0.651029	0.360552	0.653484	0.634824	0.624958	0.642124	0.672593	1	1	0.580067	0.645596	21.7006	2.84041	1.11297	0.154413	0.282624	0.428754
743	N259	Unknown_N131	C3 H3 N4 O5 P3 S2					331.877	330.87	0.798		No MS2	[M-H]-1	4	●	●	●	●	●	3.34	0.240374	0.261417	0.239584	0.265769	0.263666	0.246466	0.264285	0.27788	0.272674	0.2715	1	1	0.254162	0.266561	5.13115	4.59027	1.04878	0.0687172	0.15965	0.281054
744	N260	Unknown_N132	C6 H13 N2 O12 P3 S2					461.913	460.906	0.745		DDA for preferred ion	[M-H]-1	4	●	●	●	●	●	1.51	0.213709	0.225714	0.200281	0.216211	0.182807	0.0976287	0.0946309	0.0976112	0.0999412	0.0961501	1	1	0.207744	0.0971924	8.01046	2.02989	0.467846	-1.09589	4.38616e-07	3.05505e-06
745	N261	Unknown_N133	C10 H15 N3 O9					321.081	320.073	4.925		DDA for preferred ion	[M-H]-1	4	●	●	●	●	●	-0.53	0.57525	0.659071	0.654899	0.636701	0.620169	0.615213	0.649426	0.644229	0.644695	0.65328	1	1	0.629218	0.641369	5.39015	2.35192	1.01931	0.0275937	0.485082	0.640499
746	N262	Unknown_N134	C15 H2 Cl N4 O11 P3 S5					701.722	700.715	0.744		No MS2	[M-H]-1	4	●	●	●	●	●	-0.52	0.162127	0.179799	0.165007	0.2038	0.17174	0.225701	0.204845	0.235278	0.215286	0.23196	1	1	0.176495	0.222614	9.47042	5.62276	1.26131	0.334919	0.00113722	0.00397779
747	N263	Unknown_N135	C16 H24 N4 O11					448.142	447.135	0.974		DDA for preferred ion	[M-H]-1	4	●	●	●	●	●	-3.95	0.223053	0.183341	0.217205	0.270621	0.230996	0.505271	0.588511	0.619268	0.576583	0.582604	1	1	0.225043	0.574448	13.9057	7.31506	2.55261	1.35197	4.03329e-07	2.86675e-06
748	N264	Unknown_N136	C17 H24 O9 P2					434.09	433.083	0.888		No MS2	[M-H]-1	4	●	●	●	●	●	1.88	0.21004	0.253893	0.243434	0.239714	0.238594	0.184273	0.188777	0.216793	0.170851	0.216155	1	1	0.237135	0.19537	6.87591	10.4232	0.823876	-0.279501	0.00718918	0.020493
749	N265	Unknown_N137	C3 H3 N2 O4 P					161.982	160.975	0.677		No MS2	[M-H]-1	4	●	●	●	●	●	-3.46	1.79138	1.95788	1.91633	1.84952	1.77781	0.133543	0.130718	0.140215	0.145509	0.146721	1	1	1.85858	0.139341	4.19512	5.09038	0.0749718	-3.73751	3.27485e-11	9.36841e-10
750	N266	Unknown_N138	C15 H31 N4 O8 P3					488.137	487.13	1.033		DDA for preferred ion	[M-H]-1	4	●	●	●	●	●	3.64	0.217895	0.253146	0.216324	0.248292	0.208277	0.233384	0.225525	0.221176	0.228479	0.23798	1	1	0.228787	0.229309	8.92676	2.86742	1.00228	0.00328758	0.957953	0.962761
751	N267	Unknown_N139	C8 H2 Cl O13 P3 S					465.812	464.804	0.746		DDA for preferred ion	[M-H]-1	4	●	●	●	●	●	-0.23	1.03812	1.10398	0.992525	0.993676	0.901727	1.32214	1.15271	1.15835	1.19695	1.25509	1	1	1.00601	1.21705	7.34477	5.8794	1.20978	0.274747	0.0017834	0.00583062
752	N268	Unknown_N140	C30 H38 N4 O3 P2					564.241	563.234	7.422		DDA for preferred ion	[M-H]-1	4	●	●	●	●	●	-1.34	0.554403	0.657662	0.74636	0.713858	0.365696	0.622402	0.584191	0.657415	0.690967	0.475532	1	1	0.607596	0.606101	25.2835	13.7123	0.99754	-0.00355292	0.985204	0.986435
753	N269	Unknown_N141	C27 H36 N4 O10					576.241	575.234	5.97		DDA for preferred ion	[M-H]-1	4	●	●	●	●	●	-3.06	0.564248	0.614429	0.634221	0.612313	0.591744	0.234556	0.219666	0.214518	0.212232	0.216293	1	1	0.603391	0.219453	4.40022	4.04146	0.363699	-1.45918	1.38792e-09	1.92686e-08
754	N270	Unknown_N142	C30 H38 N4 O3 P2					564.241	563.234	7.593		DDA for preferred ion	[M-H]-1	4	●	●	●	●	●	-1.28	0.864401	1.62261	1.46959	1.48756	0.552376	0.874166	0.79944	0.865529	0.994202	0.561476	1	1	1.19931	0.818963	38.7973	19.5565	0.682863	-0.550333	0.122199	0.227102
755	N271	Unknown_N143	C17 H24 N4 O12					476.137	475.13	1.079		DDA for preferred ion	[M-H]-1	4	●	●	●	●	●	-4.7	2.53719	2.91929	2.92949	3.03992	2.86711	2.09883	1.93712	1.88597	1.93502	2.08981	1	1	2.8586	1.98935	6.65963	4.92821	0.695917	-0.523013	1.74046e-05	8.99423e-05
756	N272	Unknown_N144	C9 H19 N5 O6 P2					355.08	354.073	0.83		No MS2	[M-H]-1	4	●	●	●	●	●	-3.47	0.198802	0.207272	0.190927	0.209009	0.180621	0.251466	0.220925	0.260656	0.25508	0.226668	1	1	0.197326	0.242959	5.98336	7.37259	1.23126	0.300131	0.00143369	0.00482516
757	N273	Unknown_N145	C26 H33 N6 O12 P3					714.138	713.131	0.845		No MS2	[M-H]-1	4	●	●	●	●	●	1.46	0.208009	0.236507	0.223715	0.237186	0.216146	0.202427	0.239431	0.235592	0.230964	0.236079	1	1	0.224313	0.228898	5.67098	6.59774	1.02044	0.0291972	0.617595	0.743944
758	N274	Unknown_N146	C22 H35 Cl O9 P2					540.145	539.138	0.821		No MS2	[M-H]-1	4	●	●	●	●	●	1.1	0.228606	0.265656	0.198066	0.289149	0.298592	0.266629	0.220721	0.265861	0.269008	0.242535	1	1	0.256014	0.252951	16.4715	8.2899	0.988036	-0.0173649	0.887968	0.920001
759	N275	Unknown_N147						97.9756	96.9683	1.091		DDA for preferred ion	[M-H]-1	4	●	●	●	●	●		3.02344	3.20976	3.83411	3.92529	2.72005	3.48884	5.481	5.87851	6.16461	5.36746	1	1	3.34253	5.27608	15.6044	19.8717	1.57847	0.658527	0.00611146	0.0176089
760	N276	Unknown_N148						160.084	159.077	0.951		No MS2	[M-H]-1	4	●	●	●	●	●		0.236623	0.2328	0.249015	0.239433	0.214113	0.263682	0.222519	0.249417	0.206089	0.223778	1	1	0.234397	0.233097	5.47185	9.89964	0.994456	-0.00802093	0.915066	0.934908
761	N277	Unknown_N149						161.068	160.061	1.966		DDA for preferred ion	[M-H]-1	4	●	●	●	●	●		0.484533	0.546037	0.492843	0.50762	0.47988	0.954266	0.895314	0.934741	1.34938	0.934536	1	1	0.502182	1.01365	5.31434	18.6356	2.01848	1.01327	0.000325248	0.00128297
762	N278	Unknown_N150						173.068	172.061	1.046		DDA for preferred ion	[M-H]-1	4	●	●	●	●	●		0.232696	0.251177	0.238442	0.25321	0.247783	0.30157	0.283813	0.298387	0.272054	0.286276	1	1	0.244662	0.28842	3.58144	4.1241	1.17885	0.237383	0.000165382	0.000708399
763	N279	Unknown_N151						160.986	159.978	0.676		No MS2	[M-H]-1	4	●	●	●	●	●		1.45579	1.59586	1.5117	1.47109	1.42562	0.11158	0.107991	0.115434	0.116244	0.11857	1	1	1.49201	0.113964	4.41178	3.66896	0.0763828	-3.71061	4.87064e-11	1.25851e-09
764	N280	Unknown_N152						717.696	716.689	0.745		No MS2	[M-H]-1	4	●	●	●	●	●		0.249063	0.258668	0.237075	0.219825	0.204042	0.327052	0.281059	0.278599	0.285956	0.306163	1	1	0.233734	0.295766	9.42925	6.95829	1.26539	0.339586	0.00175568	0.00576354
765	N281	Unknown_N153						143.057	142.05	4.464		DDA for preferred ion	[M-H]-1	4	●	●	●	●	●		2.64314	2.96957	2.69916	2.8675	2.78269	2.83934	2.63488	2.71471	2.69635	2.84155	1	1	2.79241	2.74537	4.67261	3.33992	0.983152	-0.0245129	0.528012	0.672334
766	N282	Unknown_N154						303.846	302.839	0.755		DDA for preferred ion	[M-H]-1	4	●	●	●	●	●		0.478654	0.607588	0.540492	0.567488	0.508814	0.560971	0.498556	0.501726	0.501809	0.55022	1	1	0.540607	0.522657	9.27565	5.80435	0.966796	-0.0487169	0.512776	0.660344
767	N283	Unknown_N155						665.237	664.23	0.862		DDA for preferred ion	[M-H]-1	4	●	●	●	●	●		0.645478	0.708582	0.617846	0.714035	0.698237	0.717796	0.702469	0.814072	0.770172	0.739755	1	1	0.676836	0.748853	6.31722	5.93706	1.1064	0.145876	0.0310983	0.0733092
768	N284	Unknown_N156						97.9661	96.9588	1.068		DDA for preferred ion	[M-H]-1	4	●	●	●	●	●		3.93892	3.94602	4.14147	4.46123	4.16139	3.63209	3.01623	4.15667	3.88074	3.58457	1	1	4.12981	3.65406	5.15359	11.5795	0.884802	-0.176574	0.0549059	0.116867
769	N285	Unknown_N157						133.952	132.945	0.818		No MS2	[M-H]-1	4	●	●	●	●	●		0.256278	0.278642	0.243833	0.381976	0.330064	0.256439	0.253468	0.287511	0.291543	0.254508	1	1	0.298159	0.268694	19.2153	7.10897	0.901178	-0.150116	0.30706	0.458871
770	N286	Unknown_N158						115.995	114.988	0.677		DDA for preferred ion	[M-H]-1	4	●	●	●	●	●		0.663461	0.731806	0.771388	0.719203	0.710196	0.0323465	0.0314985	0.0324266	0.0320634	0.0347767	1	1	0.719211	0.0326224	5.41653	3.85643	0.0453586	-4.46248	1.89738e-10	4.22167e-09
771	N287	Unknown_N159						129.041	128.034	0.851		No MS2	[M-H]-1	4	●	●	●	●	●		0.533805	0.527227	0.509997	0.549995	0.502866	0.557166	0.545105	0.590361	0.537868	0.580603	1	1	0.524778	0.562221	3.5929	4.01812	1.07135	0.0994284	0.0216347	0.0534858
772	N288	Unknown_N160						165.042	164.034	5.863		DDA for preferred ion	[M-H]-1	4	●	●	●	●	●		1.75045	2.12864	1.95597	1.97198	1.92571	1.92234	1.80283	1.88389	1.82421	2.02493	1	1	1.94655	1.89164	6.92981	4.66892	0.97179	-0.0412837	0.46818	0.629215
773	N289	Unknown_N161						133.073	132.066	0.941		DDA for preferred ion	[M-H]-1	4	●	●	●	●	●		0.377044	0.38792	0.393693	0.359917	0.470173	0.41085	0.37729	0.398316	0.400555	0.432615	1	1	0.39775	0.403925	10.6802	4.98731	1.01553	0.0222282	0.776444	0.850796
774	N290	Unknown_N162						85.0151	84.0078	16.928		No MS2	[M-H]-1	4	●	●	●	●	●		1.06974	0.27837	0.550924	5.99983	2.69197	0.335724	0.229664	0.374592	0.303985	1.20727	1	1	2.11817	0.490247	111.563	82.4771	0.231448	-2.11124	0.167408	0.290875
775	N291	Unknown_N163						159.052	158.045	0.881		DDA for preferred ion	[M-H]-1	4	●	●	●	●	●		0.307625	0.3156	0.334168	0.366446	0.31837	0.319813	0.315246	0.339945	0.328751	0.330765	1	1	0.328442	0.326904	7.10268	2.96022	0.995318	-0.0067707	0.895065	0.924813
776	N292	Unknown_N164						387.946	386.939	0.676		DDA for preferred ion	[M-H]-1	4	●	●	●	●	●		1.55292	1.75765	1.68765	1.58345	1.56901	0.00755034	0.00684627	0.00861499	0.00953207	0.0103591	1	1	1.63014	0.00858055	5.43928	16.6239	0.0052637	-7.56971	1.40926e-10	3.2252e-09
777	N293	Unknown_N165						233.9	232.893	0.79		No MS2	[M-H]-1	4	●	●	●	●	●		0.527095	0.565632	0.555923	0.614537	0.582668	0.515398	0.558242	0.580715	0.580859	0.577179	1	1	0.569171	0.562479	5.69222	4.96606	0.988242	-0.0170636	0.735507	0.819281
778	N294	Unknown_N166						139.062	138.055	0.934		DDA for preferred ion	[M-H]-1	4	●	●	●	●	●		0.374447	0.376271	0.351019	0.349141	0.358189	0.374436	0.361917	0.432376	0.388619	0.386396	1	1	0.361813	0.388749	3.5472	6.8466	1.07445	0.103592	0.0758739	0.154644
779	N295	Unknown_N167						142.073	141.066	0.973		No MS2	[M-H]-1	4	●	●	●	●	●		0.271845	0.282029	0.253818	0.218031	0.259571	0.265523	0.256744	0.244083	0.272738	0.274477	1	1	0.257059	0.262713	9.49328	4.77519	1.022	0.0313911	0.657208	0.767122
780	N296	Unknown_N168						152.068	151.06	0.883		No MS2	[M-H]-1	4	●	●	●	●	●		0.270732	0.298332	0.30123	0.30266	0.297495	0.305731	0.323634	0.363397	0.350329	0.338374	1	1	0.29409	0.336293	4.49685	6.69927	1.1435	0.193462	0.00685814	0.0196192
781	N297	Unknown_N169						148.051	147.044	8.741		DDA for preferred ion	[M-H]-1	4	●	●	●	●	●		0.0885504	0.0908149	0.0831112	0.0747114	0.0774637	1.00823	0.877819	0.914106	0.891	1.00042	1	1	0.0829303	0.938317	8.33725	6.5763	11.3145	3.5001	1.34039e-09	1.92686e-08
782	N298	Unknown_N170						120.041	119.034	1.468		DDA for preferred ion	[M-H]-1	4	●	●	●	●	●		0.467124	0.575369	0.370109	0.531989	0.532473	0.540258	0.501156	0.531568	0.548699	0.391689	1	1	0.495413	0.502674	16.1499	12.8486	1.01466	0.0209919	0.878444	0.914193
783	N299	Unknown_N171						164.031	163.024	0.957		DDA for preferred ion	[M-H]-1	4	●	●	●	●	●		0.744103	0.61147	0.755134	0.724063	0.357258	0.871966	0.644428	0.881986	0.783741	0.664366	1	1	0.638406	0.769298	26.1997	14.5406	1.20503	0.269068	0.183875	0.314709
784	N300	Unknown_N172						381.851	380.843	0.747		DDA for preferred ion	[M-H]-1	4	●	●	●	●	●		1.92026	2.04138	1.91904	1.93193	1.72592	2.4237	2.14955	2.19484	2.20039	2.28349	1	1	1.90771	2.25039	5.96453	4.81105	1.17963	0.238336	0.00122639	0.00421604
785	N301	Unknown_N173						297.889	296.882	0.747		DDA for preferred ion	[M-H]-1	4	●	●	●	●	●		2.7892	2.9919	2.76011	2.83894	2.56827	3.38242	3.1018	3.18144	3.15226	3.23321	1	1	2.78968	3.21023	5.47222	3.34507	1.15075	0.202574	0.00100376	0.00358934
786	N302	Unknown_N174						145.036	144.029	1.033		DDA for preferred ion	[M-H]-1	4	●	●	●	●	●		0.431179	0.474005	0.437097	0.473786	0.422781	0.537574	0.470977	0.492308	0.484032	0.540551	1	1	0.44777	0.505089	5.44609	6.32561	1.12801	0.173779	0.0128257	0.0337941
787	N303	Unknown_N175						293.93	292.923	0.811		No MS2	[M-H]-1	4	●	●	●	●	●		2.13252	2.11595	2.27169	2.72873	2.47709	1.90796	2.01699	2.3175	2.08982	2.11346	1	1	2.3452	2.08915	11.0306	7.21081	0.890819	-0.166796	0.0921615	0.182587
788	N304	Unknown_N176						143.057	142.05	2.608		DDA for preferred ion	[M-H]-1	4	●	●	●	●	●		2.11884	2.36719	2.32116	2.40629	2.33951	2.23498	2.21399	2.32075	2.26163	2.36651	1	1	2.3106	2.27957	4.84243	2.76275	0.986572	-0.0195035	0.603678	0.734872
789	N305	Unknown_N177						134.057	133.05	1.869		DDA for preferred ion	[M-H]-1	4	●	●	●	●	●		0.274389	0.304959	0.28066	0.309453	0.301985	0.714786	0.662449	0.70562	0.660176	0.701321	1	1	0.294289	0.68887	5.33163	3.72135	2.34079	1.227	1.96443e-09	2.53792e-08
790	N306	Unknown_N178						89.0464	88.0391	0.805		No MS2	[M-H]-1	4	●	●	●	●	●		0.578502	0.679607	0.614074	0.63011	0.616638	0.687152	0.745165	0.763261	0.695839	0.708082	1	1	0.623786	0.7199	5.86396	4.55944	1.15408	0.206744	0.002371	0.00750661
791	N307	Unknown_N179						129.966	128.958	0.749		DDA for preferred ion	[M-H]-1	4	●	●	●	●	●		9.86915	10.8049	10.1079	10.48	9.83008	11.238	10.563	10.7904	10.807	11.0636	1	1	10.2184	10.8924	4.08621	2.40699	1.06596	0.0921526	0.0156582	0.0403287
792	N308	Unknown_N180						133.036	132.029	0.806		DDA for preferred ion	[M-H]-1	4	●	●	●	●	●		9.64952	10.656	9.88511	10.1035	9.47884	10.4446	10.9213	11.8885	10.7826	10.7363	1	1	9.95458	10.9547	4.59886	5.02202	1.10046	0.138113	0.0141316	0.0366323
793	N309	Unknown_N181						195.953	194.946	0.81		No MS2	[M-H]-1	4	●	●	●	●	●		11.4602	11.7625	12.3733	13.3519	12.7188	10.6137	11.1105	12.4649	11.2514	11.5184	1	1	12.3333	11.3918	6.11594	6.00498	0.923657	-0.114571	0.0725007	0.148525
794	N310	Unknown_N182						97.9665	96.9593	0.803		DDA for preferred ion	[M-H]-1	4	●	●	●	●	●		34.7728	36.2436	35.2157	39.1884	38.1285	35.0264	35.2534	37.537	35.1187	35.7842	1	1	36.7098	35.7439	5.16098	2.92195	0.97369	-0.0384658	0.347375	0.501347
795	N311	Unknown_N183						97.9754	96.9681	0.809		DDA for preferred ion	[M-H]-1	4	●	●	●	●	●		50.832	51.4279	52.2317	54.598	52.9518	48.2738	49.6731	53.8483	49.9077	49.6814	1	1	52.4083	50.2768	2.79246	4.17485	0.95933	-0.0599006	0.0995323	0.193979
796	N312	Unknown_N184						115.026	114.018	1.57		DDA for preferred ion	[M-H]-1	4	●	●	●	●	●		0.659235	0.710906	0.761041	0.762464	0.72498	0.701375	0.711456	0.728053	0.701957	0.750615	1	1	0.723725	0.718691	5.8696	2.90119	0.993044	-0.0100701	0.817958	0.871948
797	N313	Unknown_N185						132.052	131.045	0.789		No MS2	[M-H]-1	4	●	●	●	●	●		1.1986	1.25633	1.27713	1.48869	1.33093	0.984395	1.13667	1.21906	1.11176	1.12026	1	1	1.31033	1.11443	8.42408	7.55995	0.850492	-0.23363	0.013504	0.0351489
798	N314	Unknown_N186						85.015	84.0078	16.693		DDA for preferred ion	[M-H]-1	4	●	●	●	●	●		0.345417	0.577177	3.26	0.880097	0.750216	0.356946	0.924876	0.435411	1.95122	1.03954	1	1	1.16258	0.941598	102.314	67.738	0.80992	-0.304148	0.723778	0.813782
799	N315	Unknown_N187						120.041	119.034	1.035		DDA for preferred ion	[M-H]-1	4	●	●	●	●	●		0.503149	0.528161	0.547117	0.540104	0.516872	0.66944	0.588595	0.651069	0.612507	0.653572	1	1	0.527081	0.635037	3.35273	5.25147	1.20482	0.268816	0.000210014	0.000876153
800	N316	Unknown_N188						331.887	330.879	0.801		No MS2	[M-H]-1	4	●	●	●	●	●		0.48261	0.537665	0.512765	0.572864	0.536402	0.479713	0.481123	0.522525	0.463966	0.533936	1	1	0.528461	0.496253	6.32442	6.0915	0.939053	-0.0907221	0.148679	0.26583
801	N317	Unknown_N189						233.909	232.902	0.792		No MS2	[M-H]-1	4	●	●	●	●	●		0.771665	0.846866	0.828714	0.84864	0.80339	0.704144	0.774035	0.839793	0.794939	0.819575	1	1	0.819855	0.786497	3.96647	6.65037	0.959313	-0.059927	0.260425	0.407423
